# Supplementary material for: Detection of bacterial pathogens from clinical specimens using conventional microbial culture and 16S metagenomics: a comparative study
Source: PubMed Central journal article supplement (PMC5606128; doi:10.1186/s12879-017-2727-8), 2017-09-19

|                              |    |
|------------------------------|----|
| Additional File 4_B_P1.....  | 4  |
| Additional file 4_B_P5.....  | 5  |
| Additional file 4_B_P6.....  | 6  |
| Additional file 4_B_P7.....  | 7  |
| Additional file 4_B_P10..... | 8  |
| Additional file 4_B_P11..... | 9  |
| Additional file 4_B_P12..... | 10 |
| Additional file 4_B_P13..... | 11 |
| Additional file 4_B_P14..... | 12 |
| Additional file 4_B_P15..... | 13 |
| Additional file 4_B_P16..... | 14 |
| Additional file 4_B_P17..... | 15 |
| Additional file 4_B_P20..... | 16 |
| Additional file 4_B_P21..... | 17 |
| Additional file 4_B_P22..... | 18 |
| Additional file 4_B_P23..... | 19 |
| Additional file 4_B_P24..... | 20 |
| Additional file 4_B_P25..... | 21 |
| Additional file 4_B_P26..... | 22 |
| Additional file 4_B_P27..... | 23 |
| Additional file 4_B_P28..... | 24 |
| Additional file 4_B_P29..... | 25 |
| Additional file 4_B_P30..... | 26 |
| Additional file 4_B_P31..... | 27 |
| Additional file 4_B_P33..... | 28 |
| Additional file 4_B_P34..... | 29 |
| Additional file 4_B_P35..... | 30 |
| Additional file 4_B_P36..... | 31 |
| Additional file 4_B_P37..... | 32 |

|                              |    |
|------------------------------|----|
| Additional file 4_B_P38..... | 33 |
| Additional file 4_B_P39..... | 34 |
| Additional file 4_B_P40..... | 35 |
| Additional file 4_B_P41..... | 36 |
| Additional file 4_B_P42..... | 37 |
| Additional file 4_B_P43..... | 38 |
| Additional file 4_B_P44..... | 39 |
| Additional file 4_B_P45..... | 40 |
| Additional file 4_B_P46..... | 41 |
| Additional file 4_B_P47..... | 42 |
| Additional file 4_B_P49..... | 43 |
| Additional file 4_B_P50..... | 44 |
| Additional file 4_B_P51..... | 45 |
| Additional file 4_B_P53..... | 46 |
| Additional file 4_B_P54..... | 47 |
| Additional file 4_B_P57..... | 48 |
| Additional file 4_B_P58..... | 49 |
| Additional file 4_B_P59..... | 50 |
| Additional file 4_B_P60..... | 51 |
| Additional file 4_B_P61..... | 52 |
| Additional file 4_B_P62..... | 53 |
| Additional file 4_B_P63..... | 54 |
| Additional file 4_B_P64..... | 55 |
| Additional file 4_B_P65..... | 56 |
| Additional file 4_B_P66..... | 57 |
| Additional file 4_B_P67..... | 58 |
| Additional file 4_B_P69..... | 59 |
| Additional file 4_B_P70..... | 60 |
| Additional file 4_B_P71..... | 61 |

|                              |    |
|------------------------------|----|
| Additional file 4_B_P74..... | 62 |
| Additional file 4_B_P75..... | 63 |
| Additional file 4_B_P76..... | 64 |
| Additional file 4_B_P77..... | 65 |
| Additional file 4_B_P78..... | 66 |
| Additional file 4_B_P80..... | 67 |
| Additional file 4_B_P81..... | 68 |
| Additional file 4_B_P82..... | 69 |
| Additional file 4_B_P84..... | 70 |
| Additional file 4_B_P85..... | 71 |
| Additional file 4_B_P86..... | 72 |
| Additional file 4_B_P87..... | 73 |
| Additional file 4_B_P88..... | 74 |
| Additional file 4_B_P89..... | 75 |
| Additional file 4_B_P90..... | 76 |
| Additional file 4_B_P91..... | 77 |
| Additional file 4_B_P93..... | 78 |
| Additional file 4_B_P94..... | 79 |
| Additional file 4_B_P96..... | 80 |
| Additional file 4_F_P17..... | 81 |
| Additional file 4_F_P22..... | 82 |
| Additional file 4_F_P25..... | 83 |
| Additional file 4_F_P26..... | 84 |
| Additional file 4_F_P37..... | 85 |
| Additional file 4_F_P38..... | 86 |
| Additional file 4_F_P76..... | 87 |
| Additional file 4_F_P81..... | 88 |
| Additional file 4_F_P85..... | 89 |

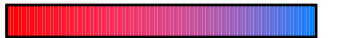

100% 50% 0%

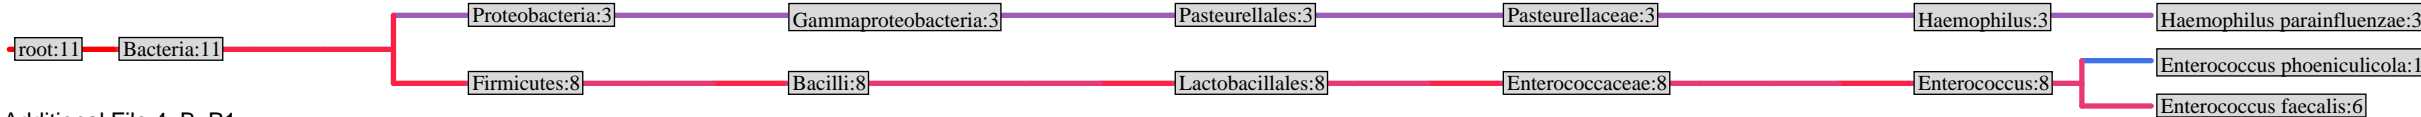

Additional File 4\_B\_P1

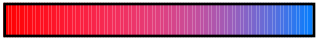

100% 50% 0%

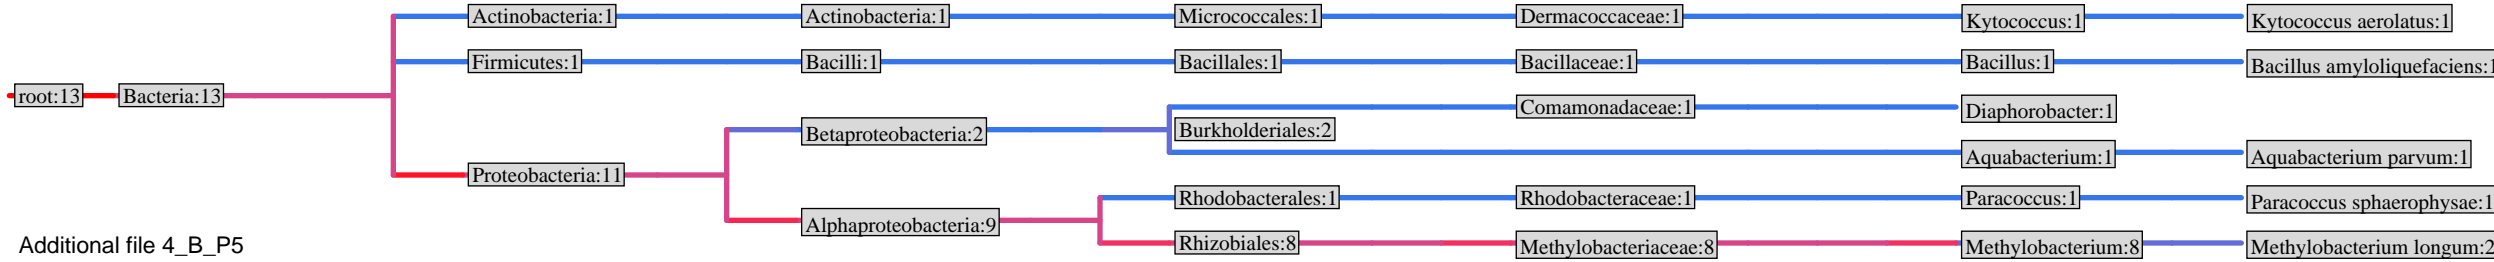

Additional file 4\_B\_P5

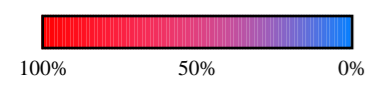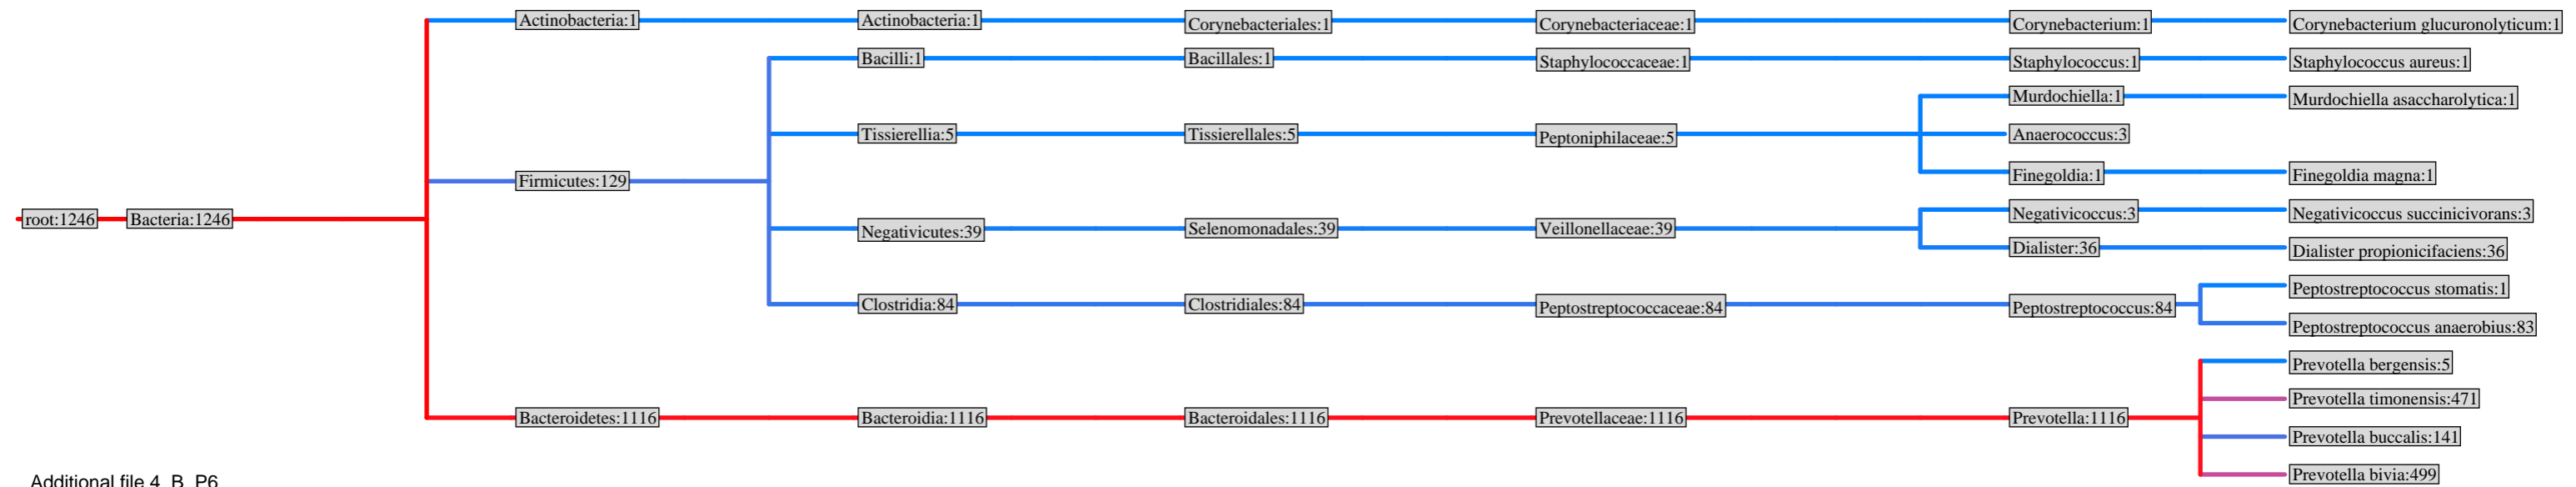

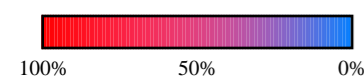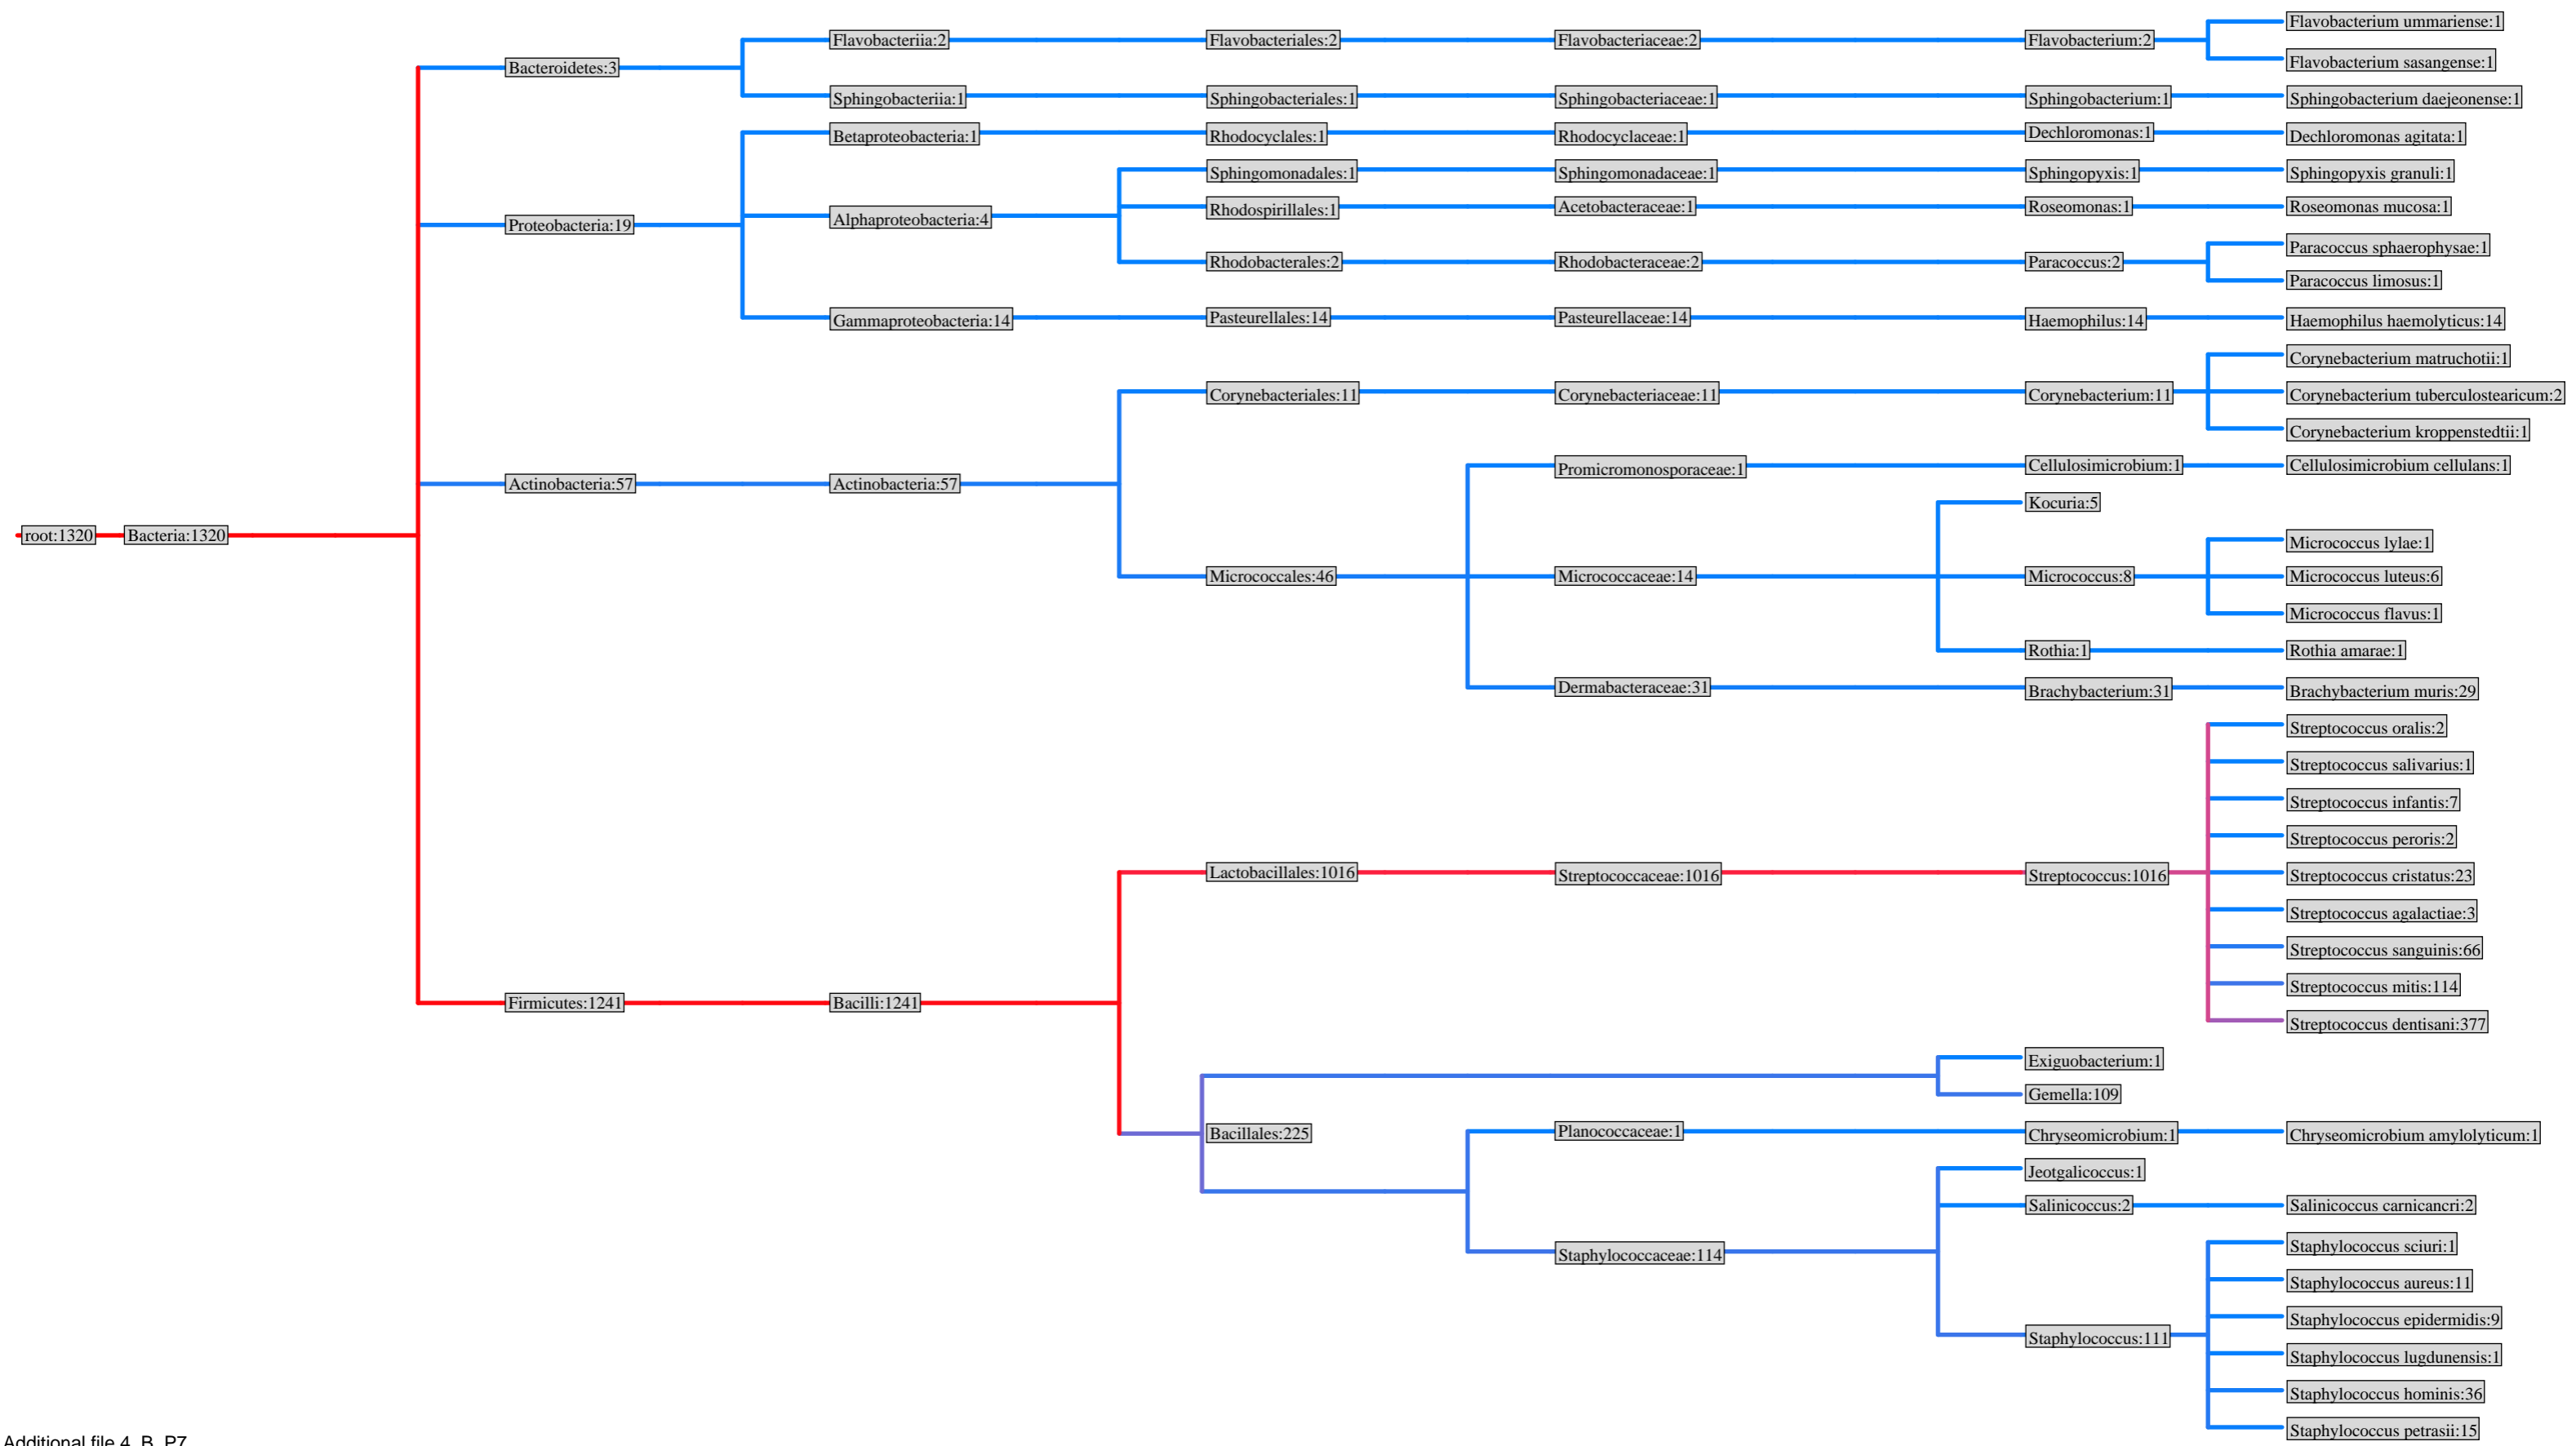

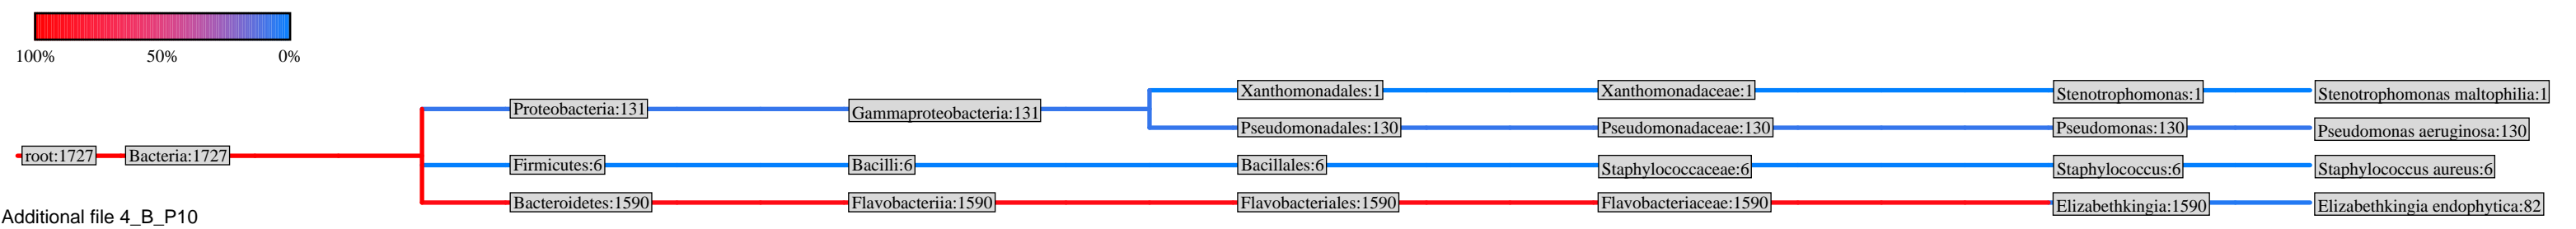



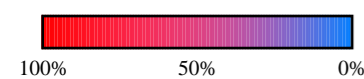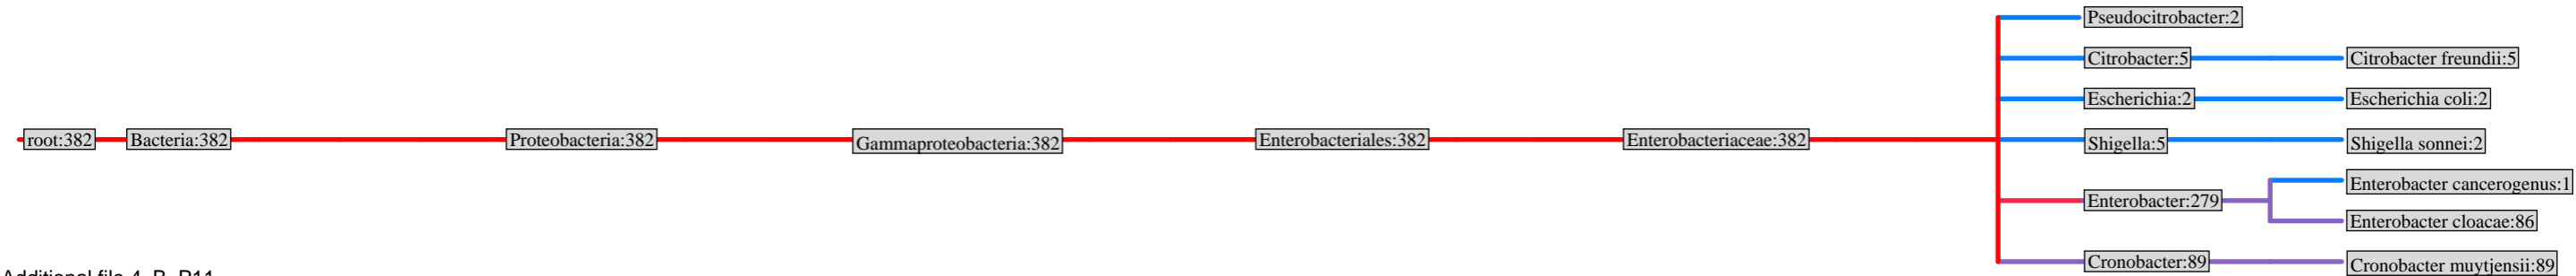

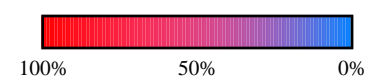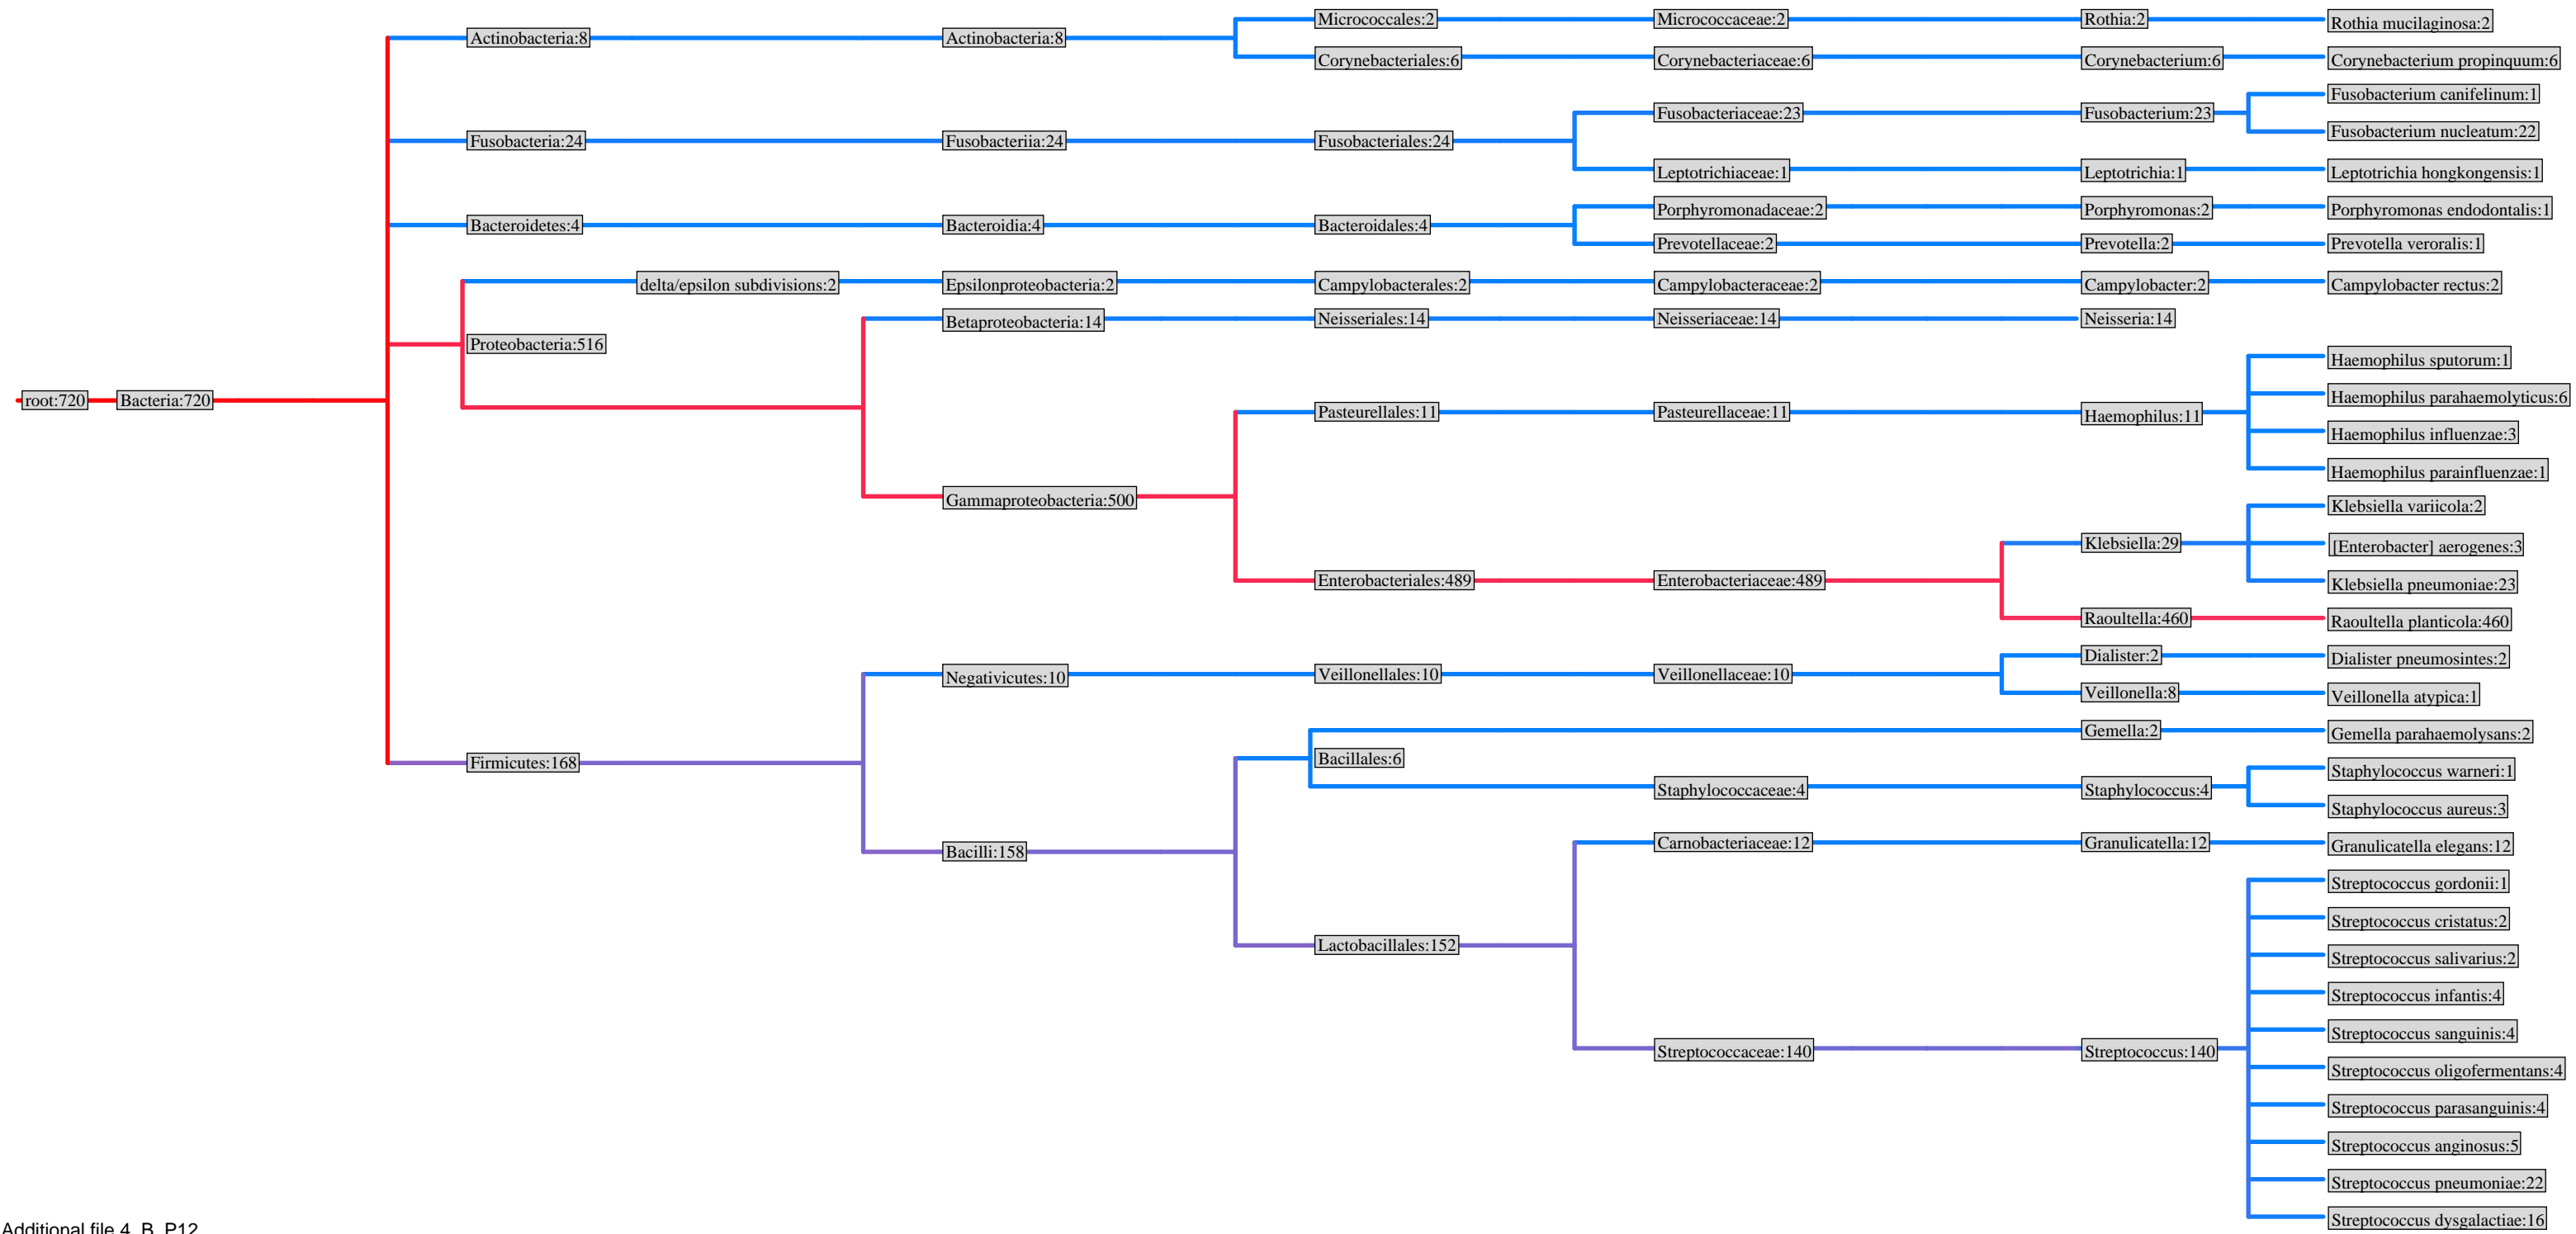

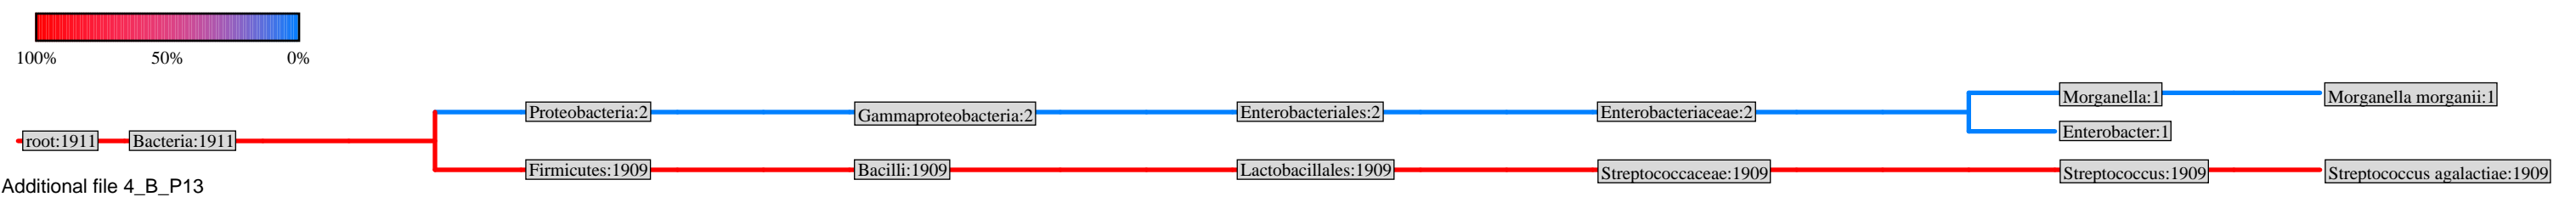

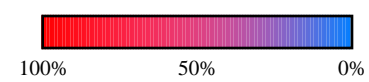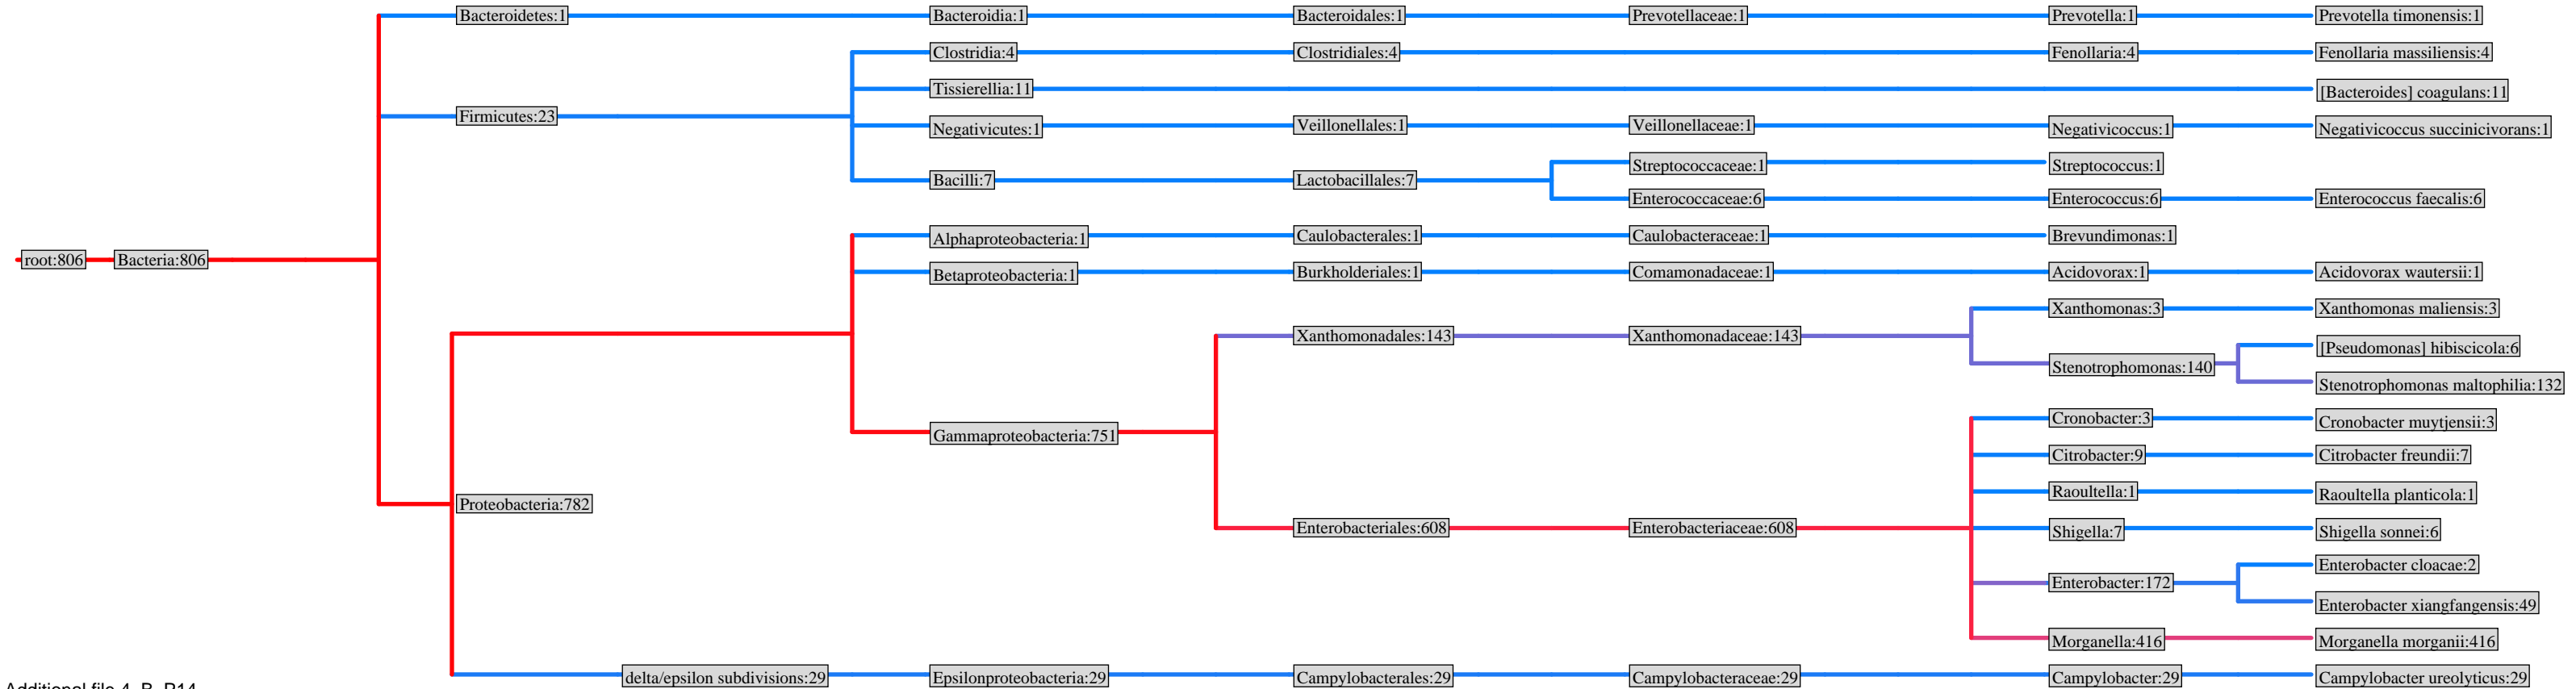

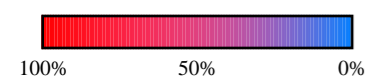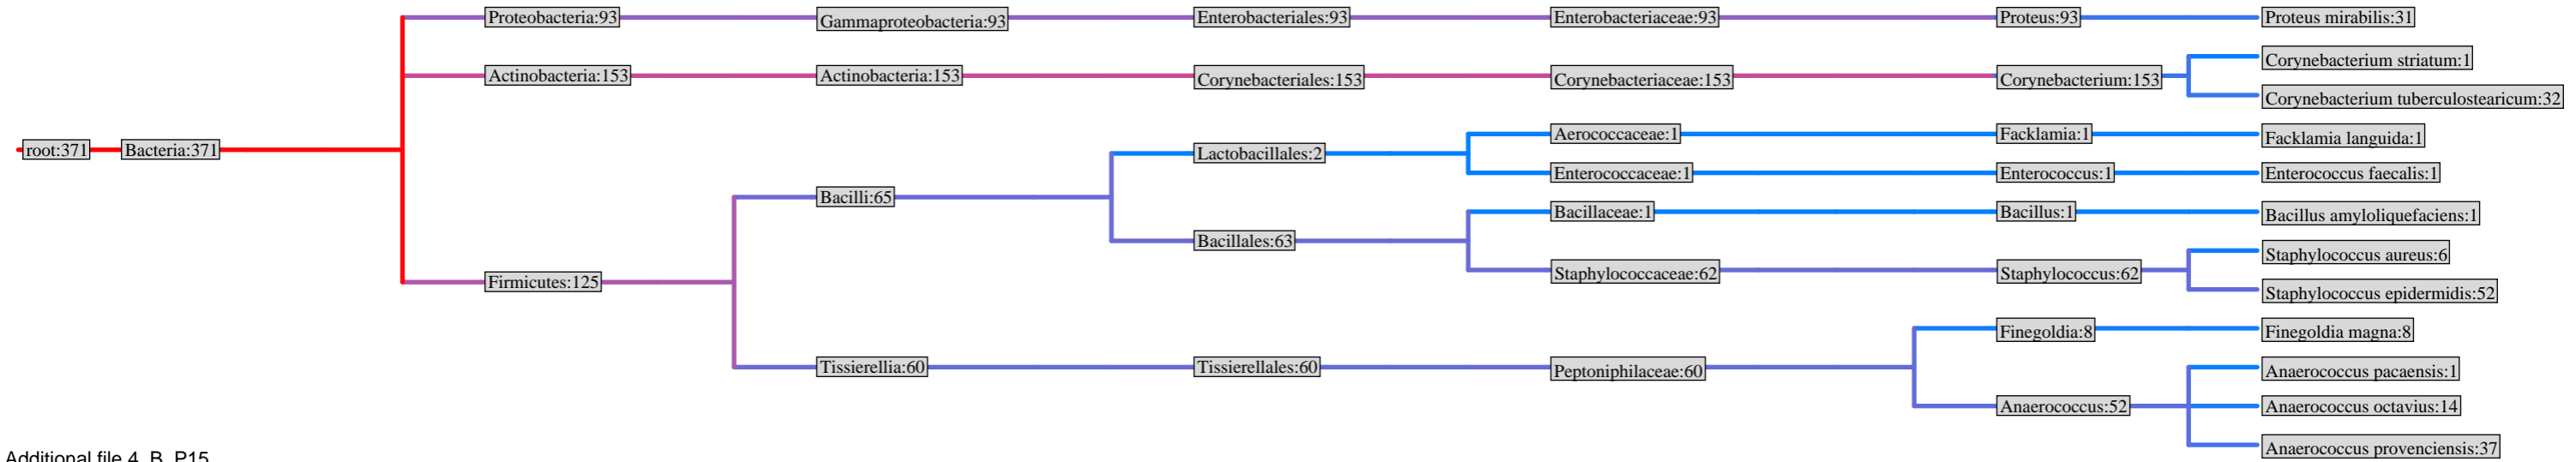

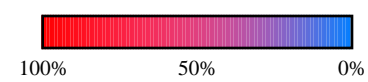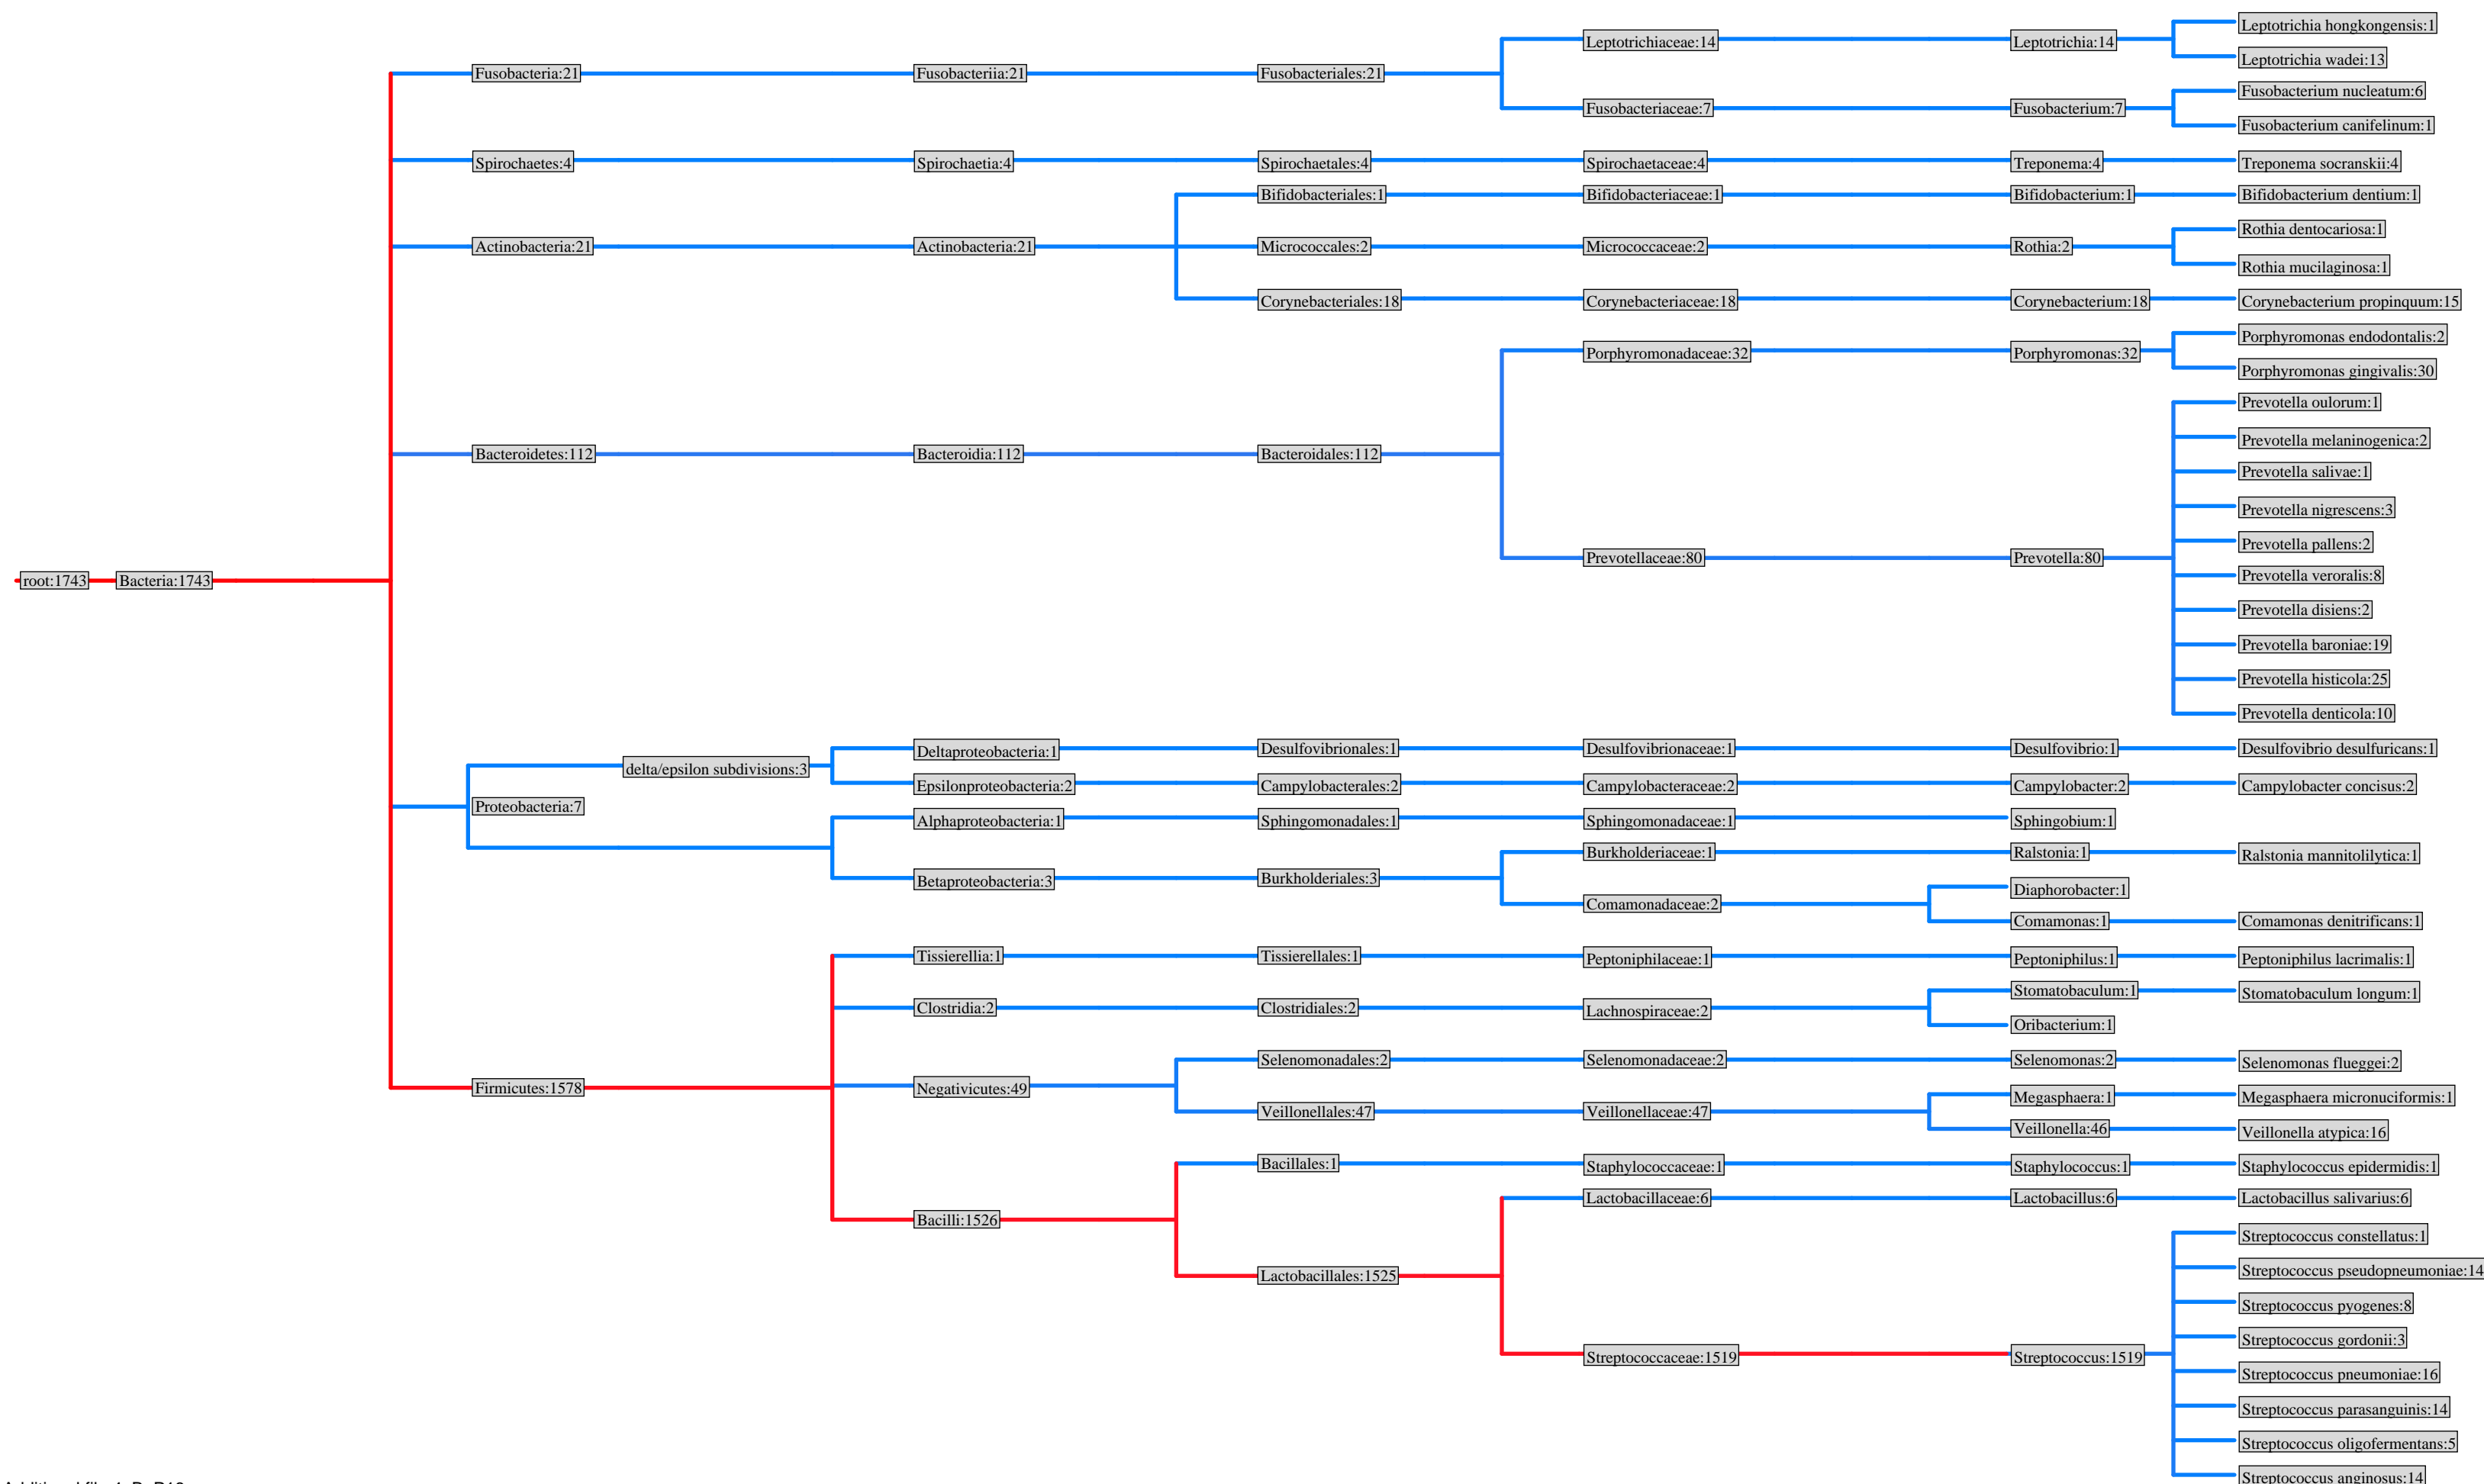

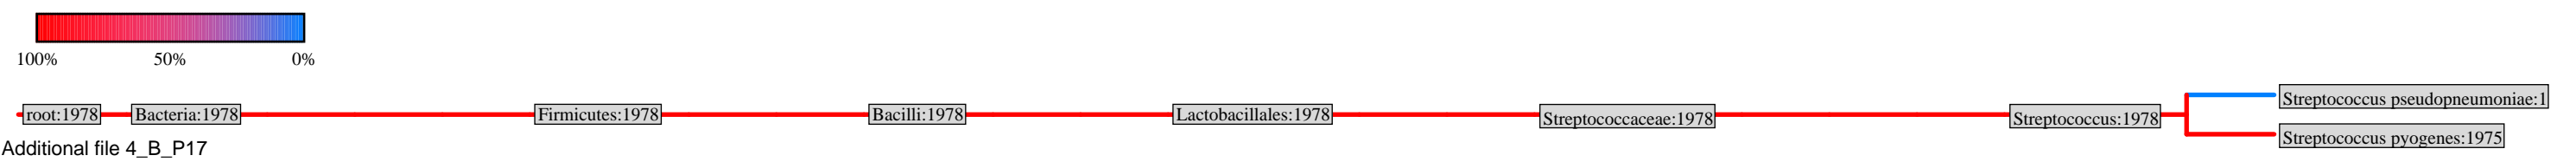

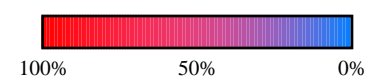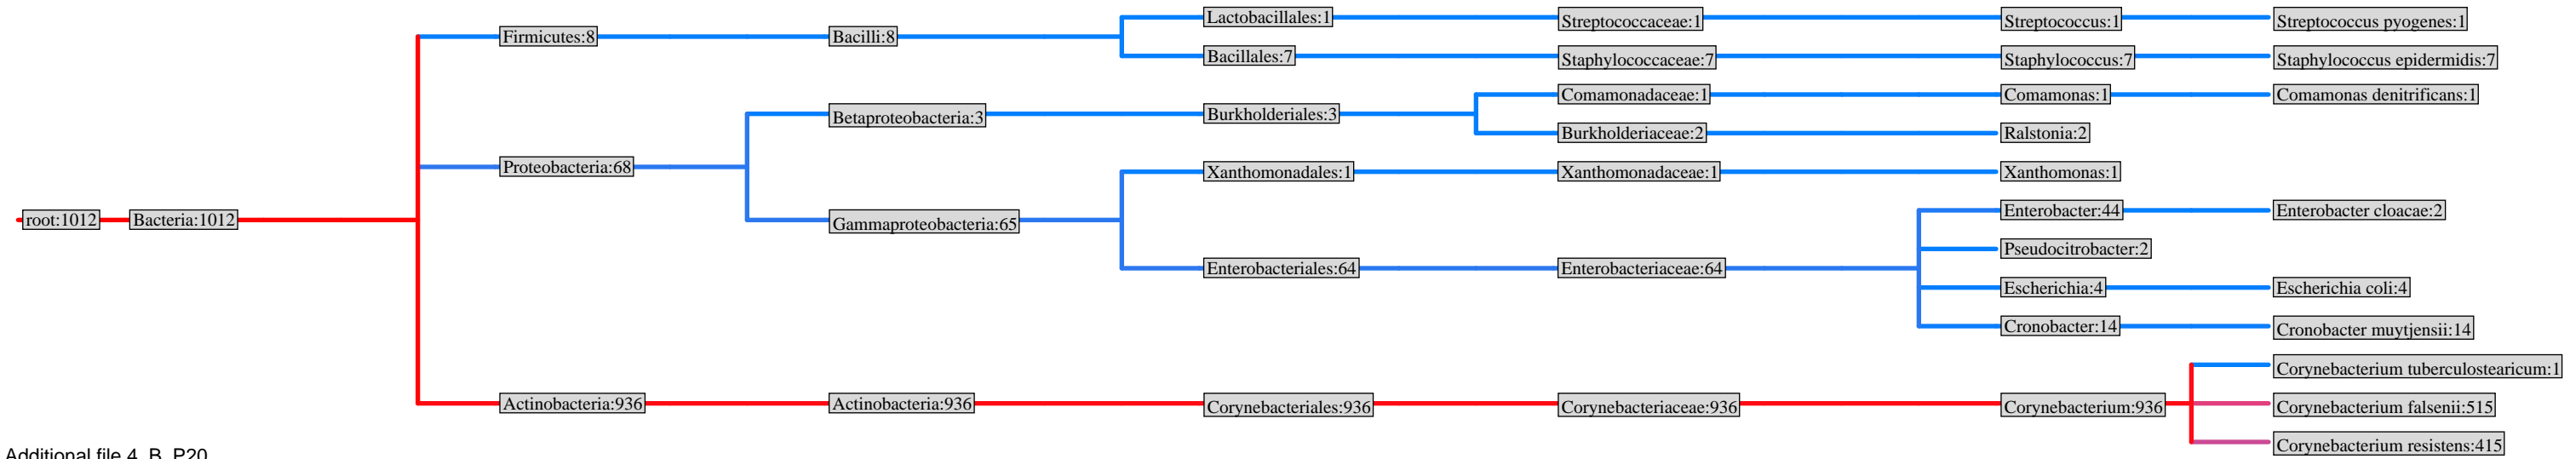



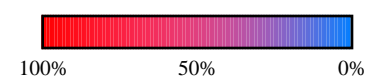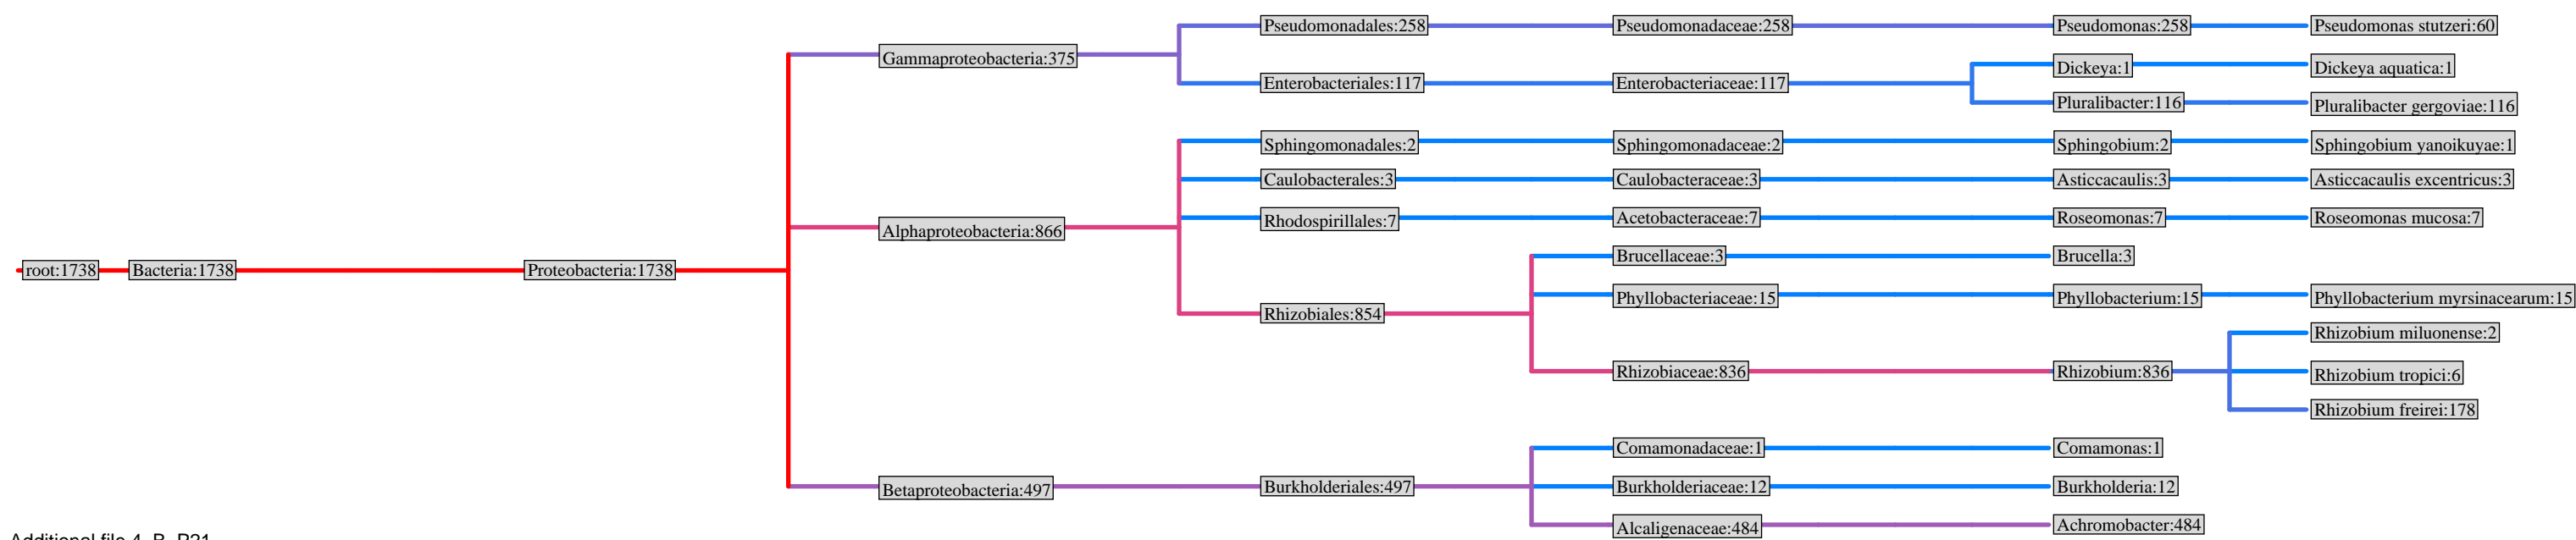

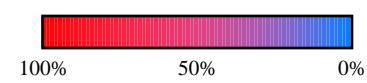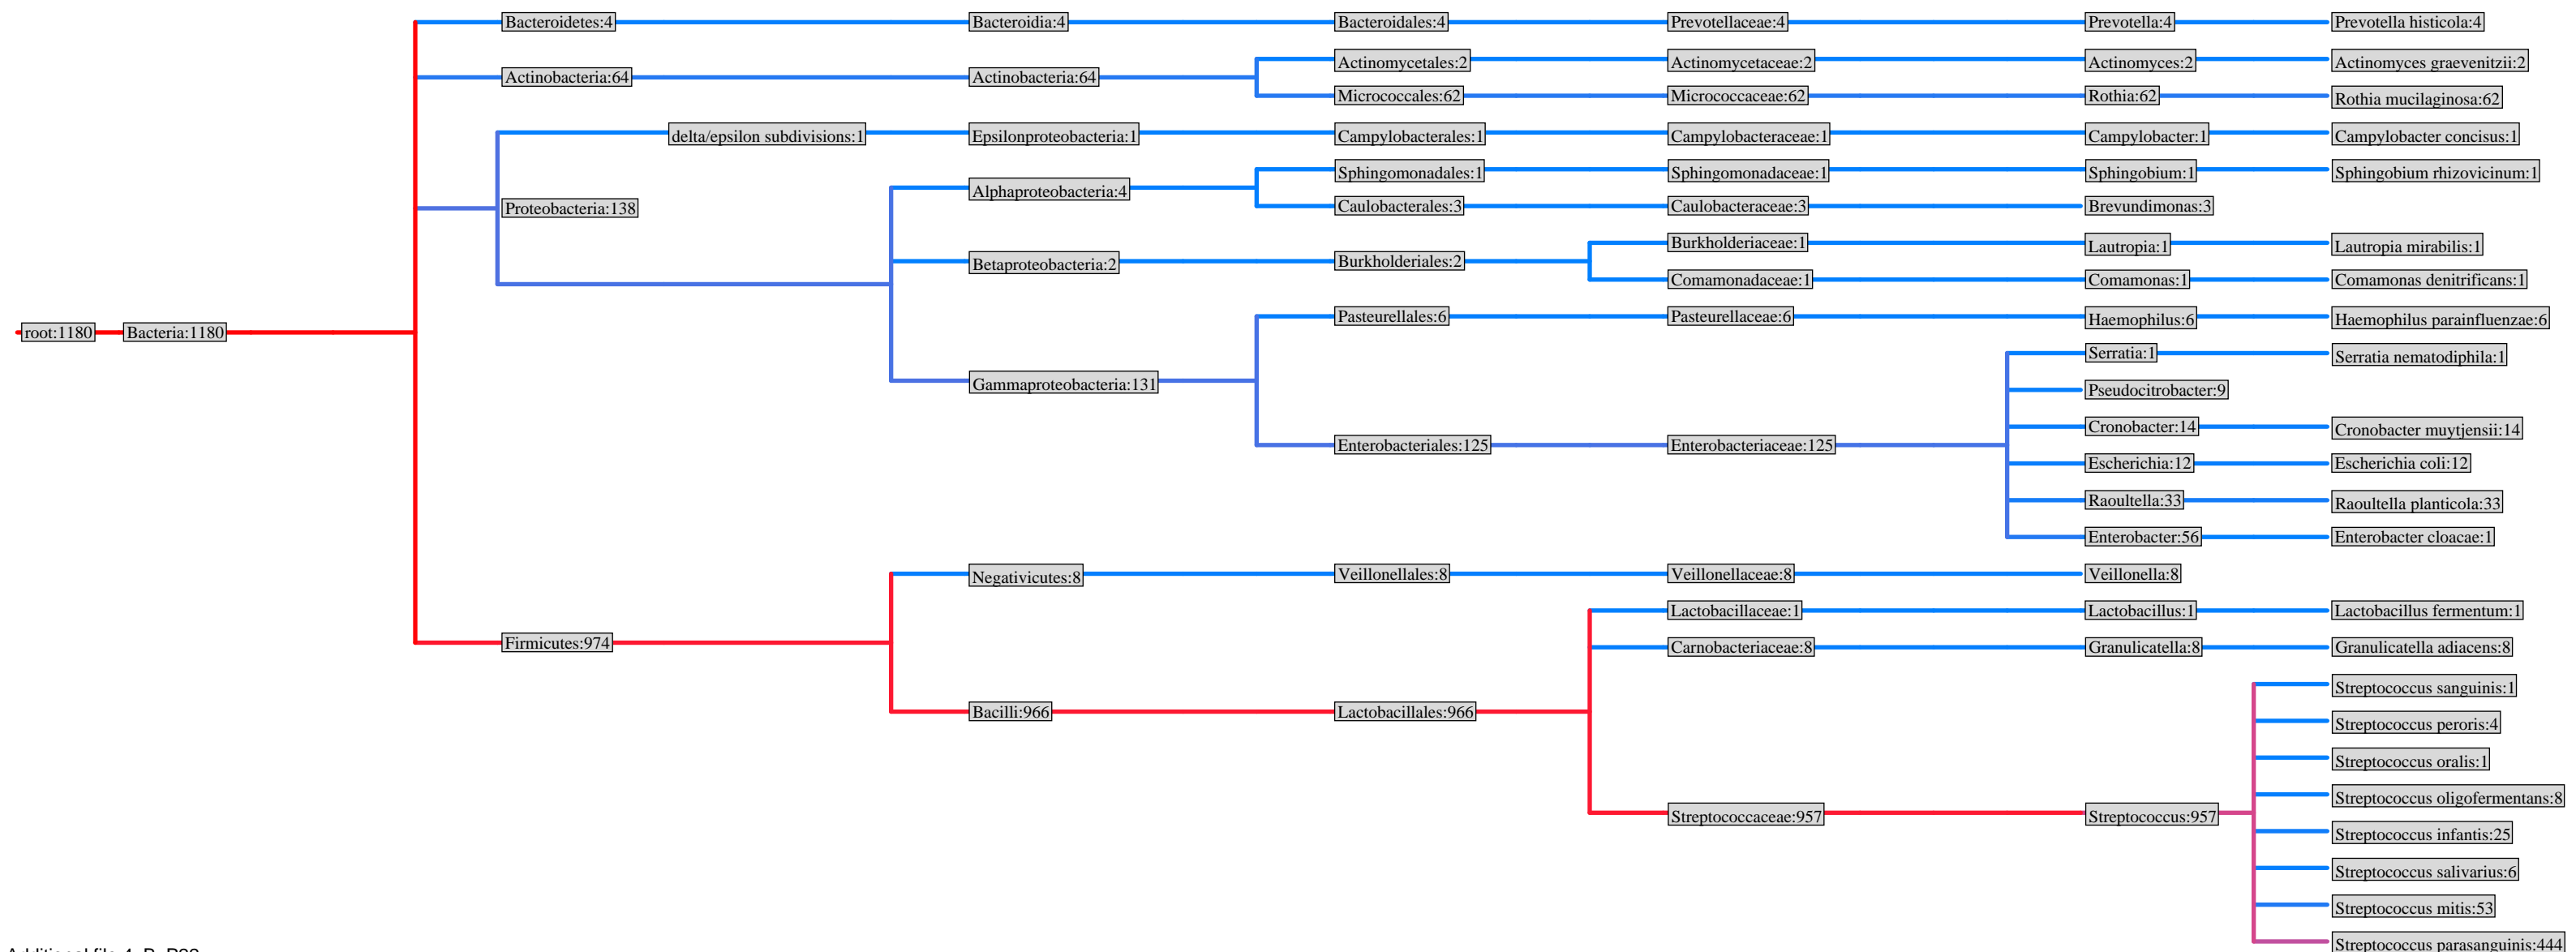

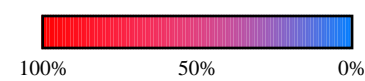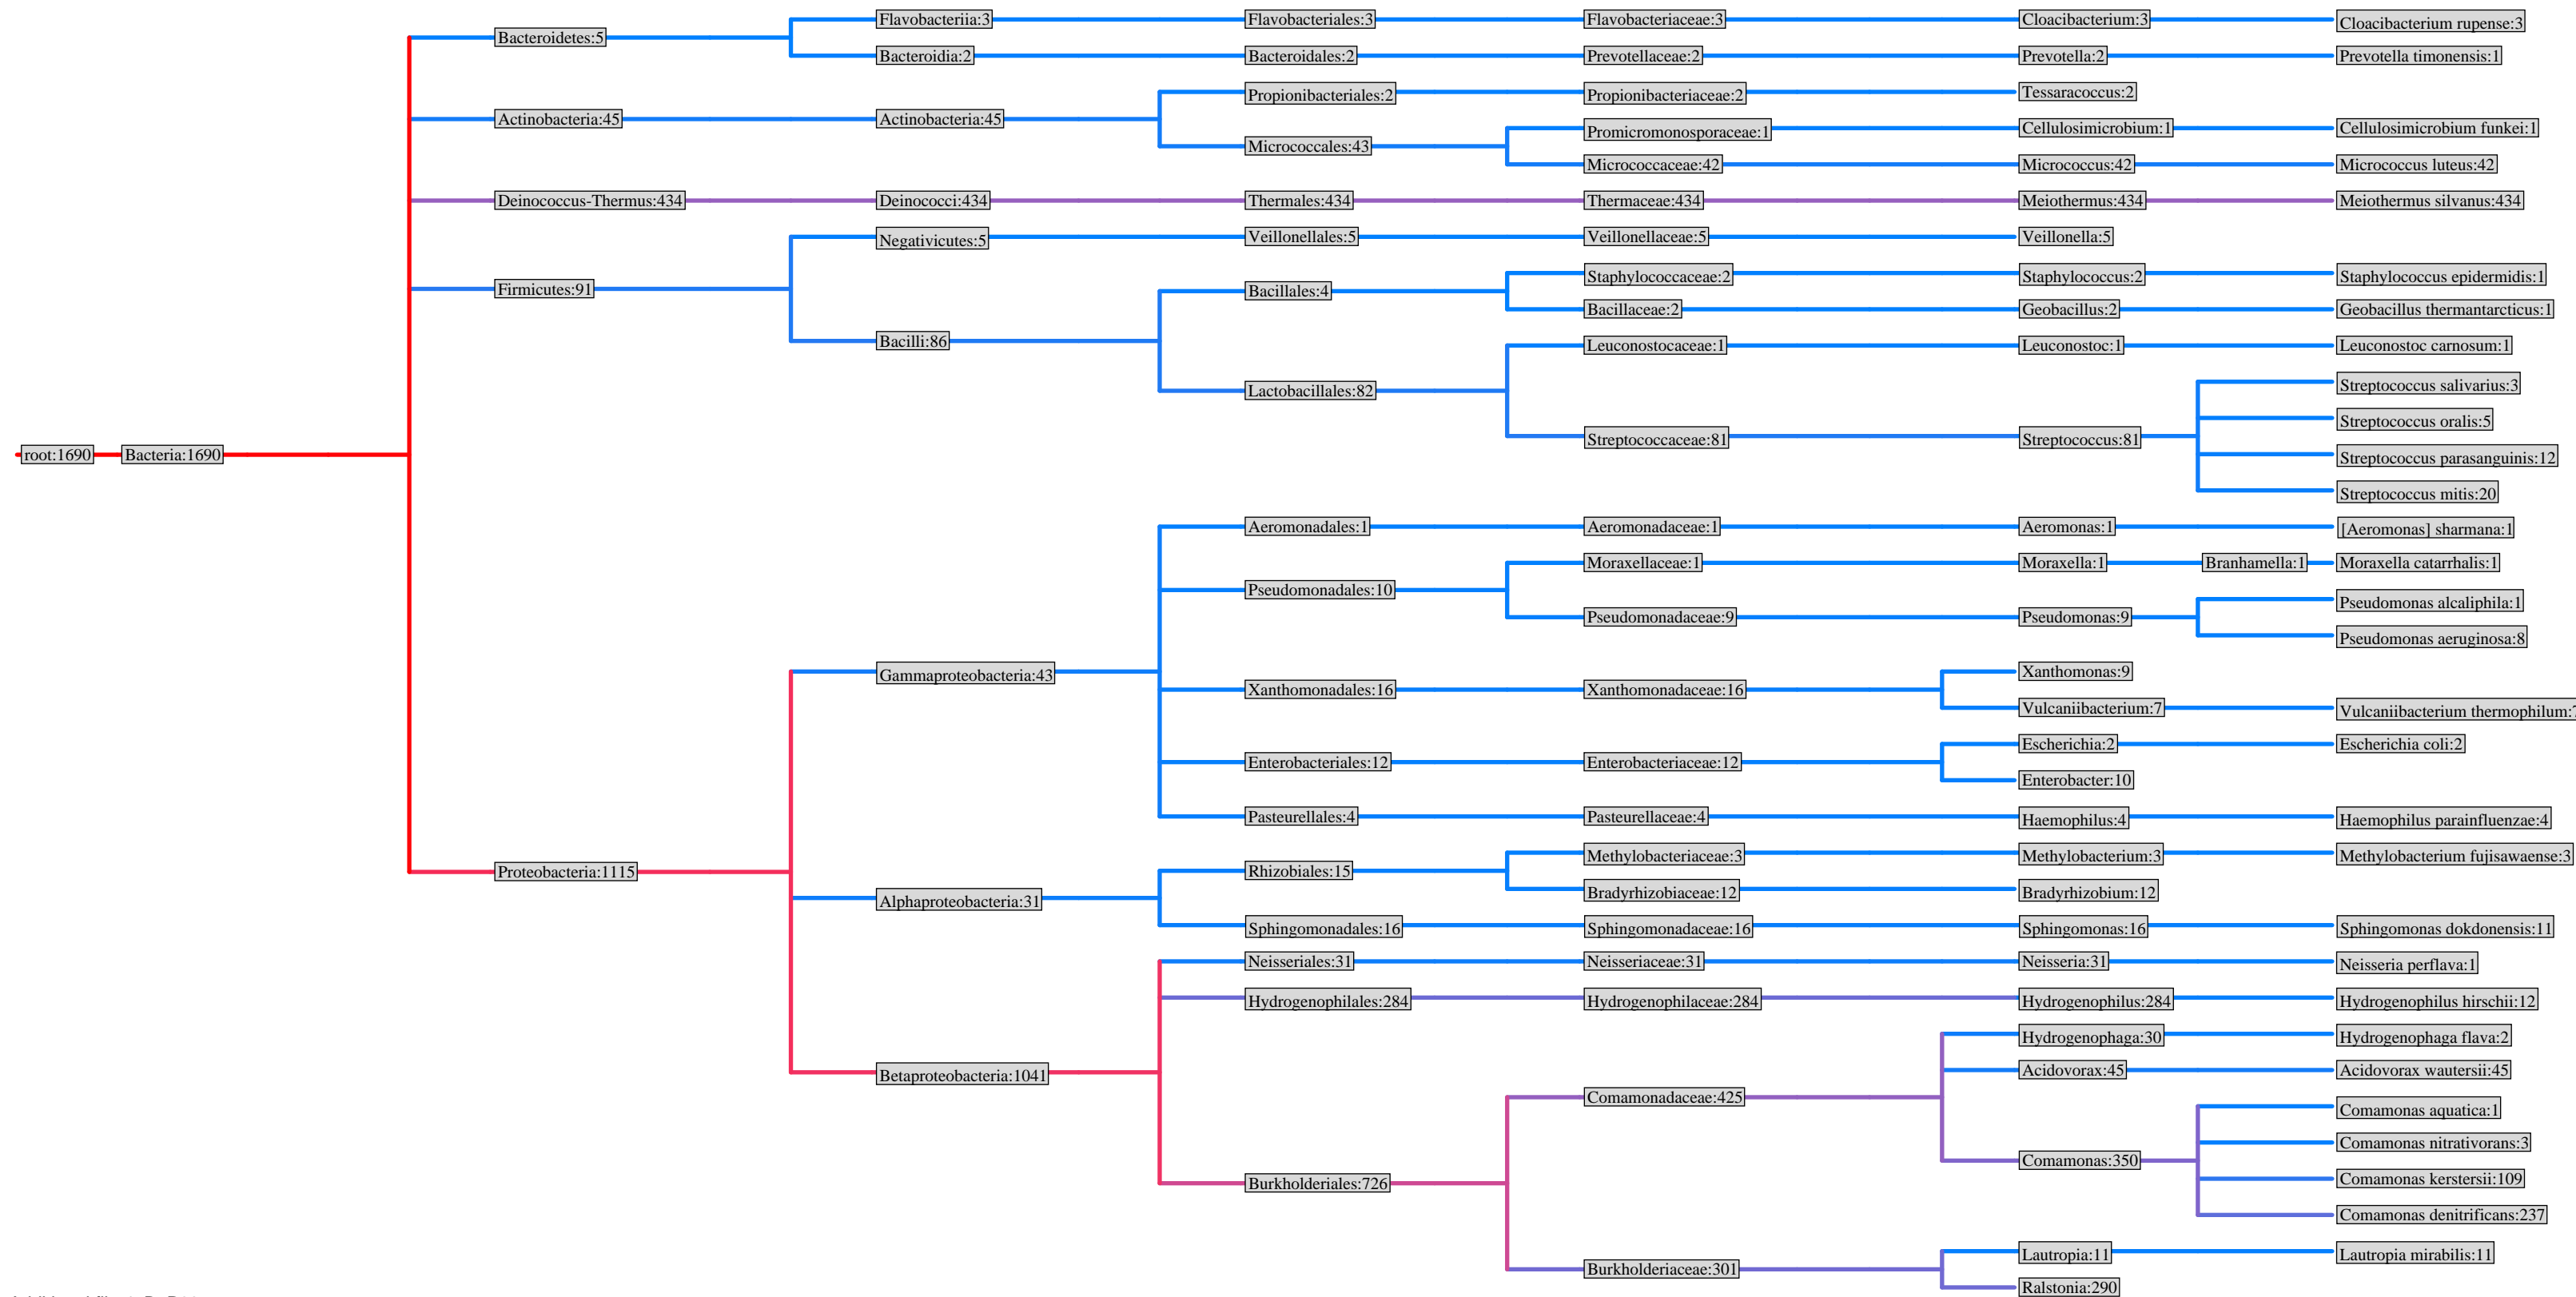

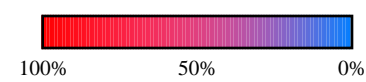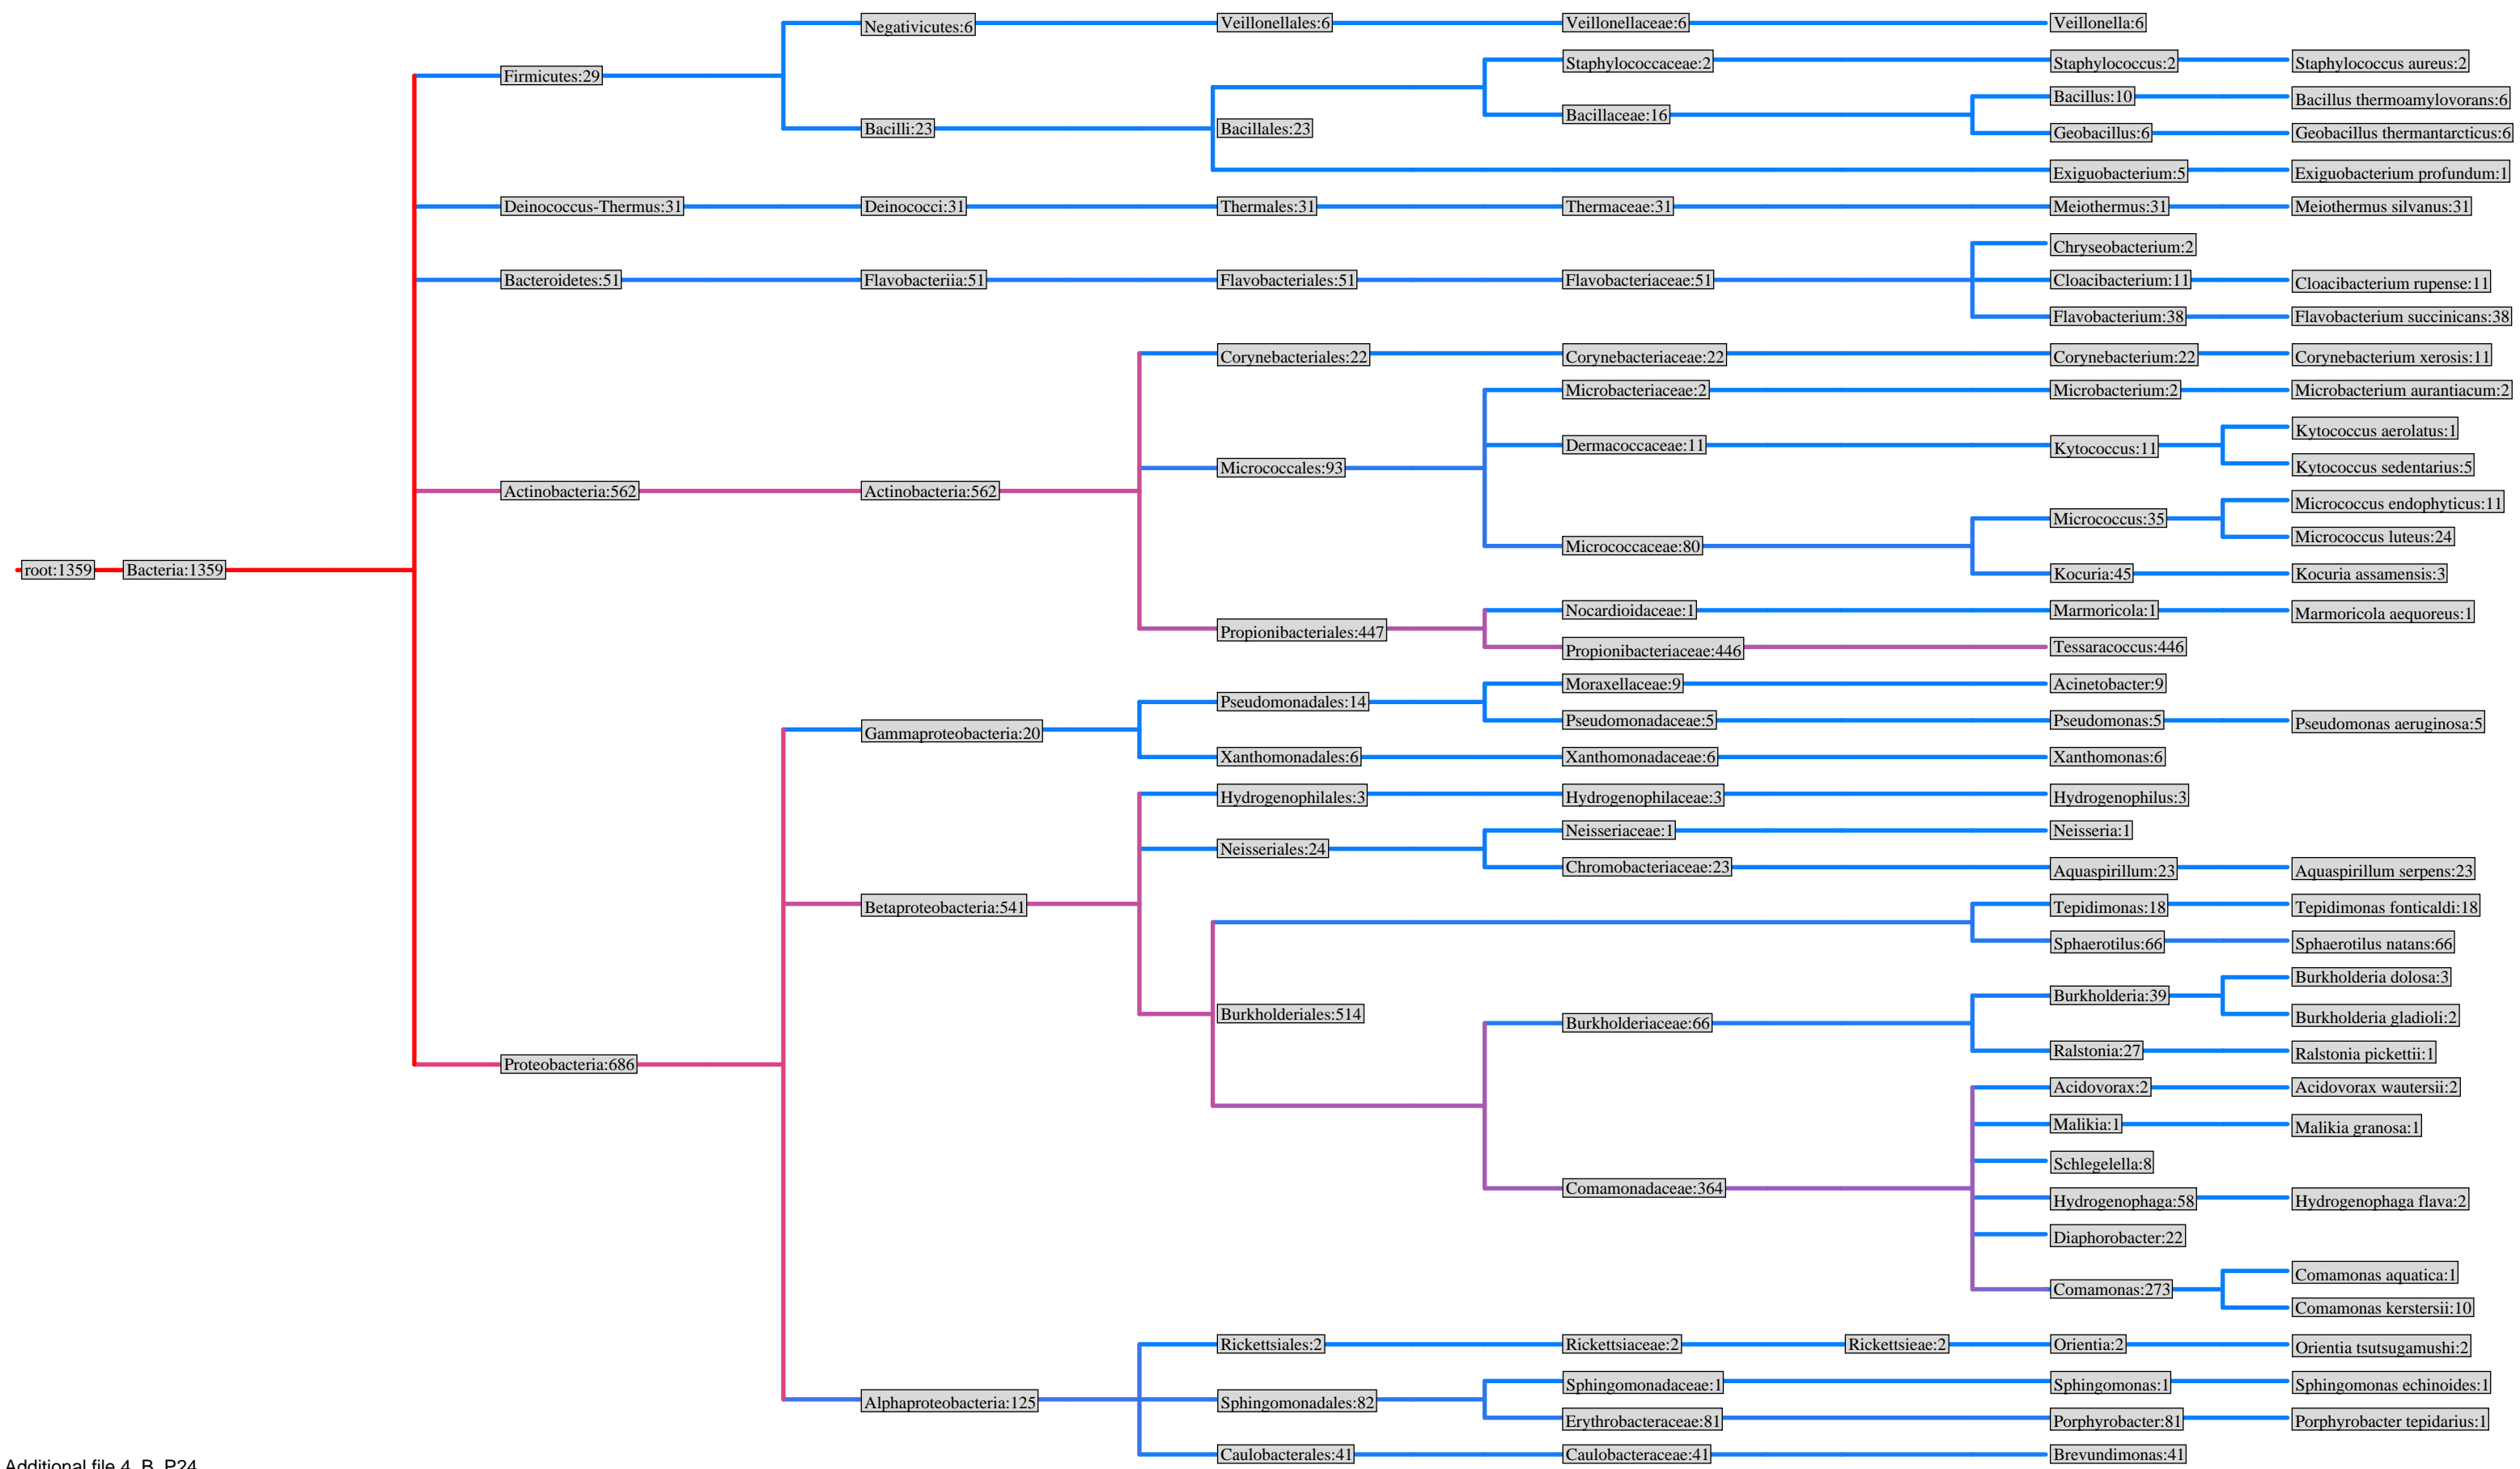

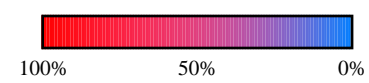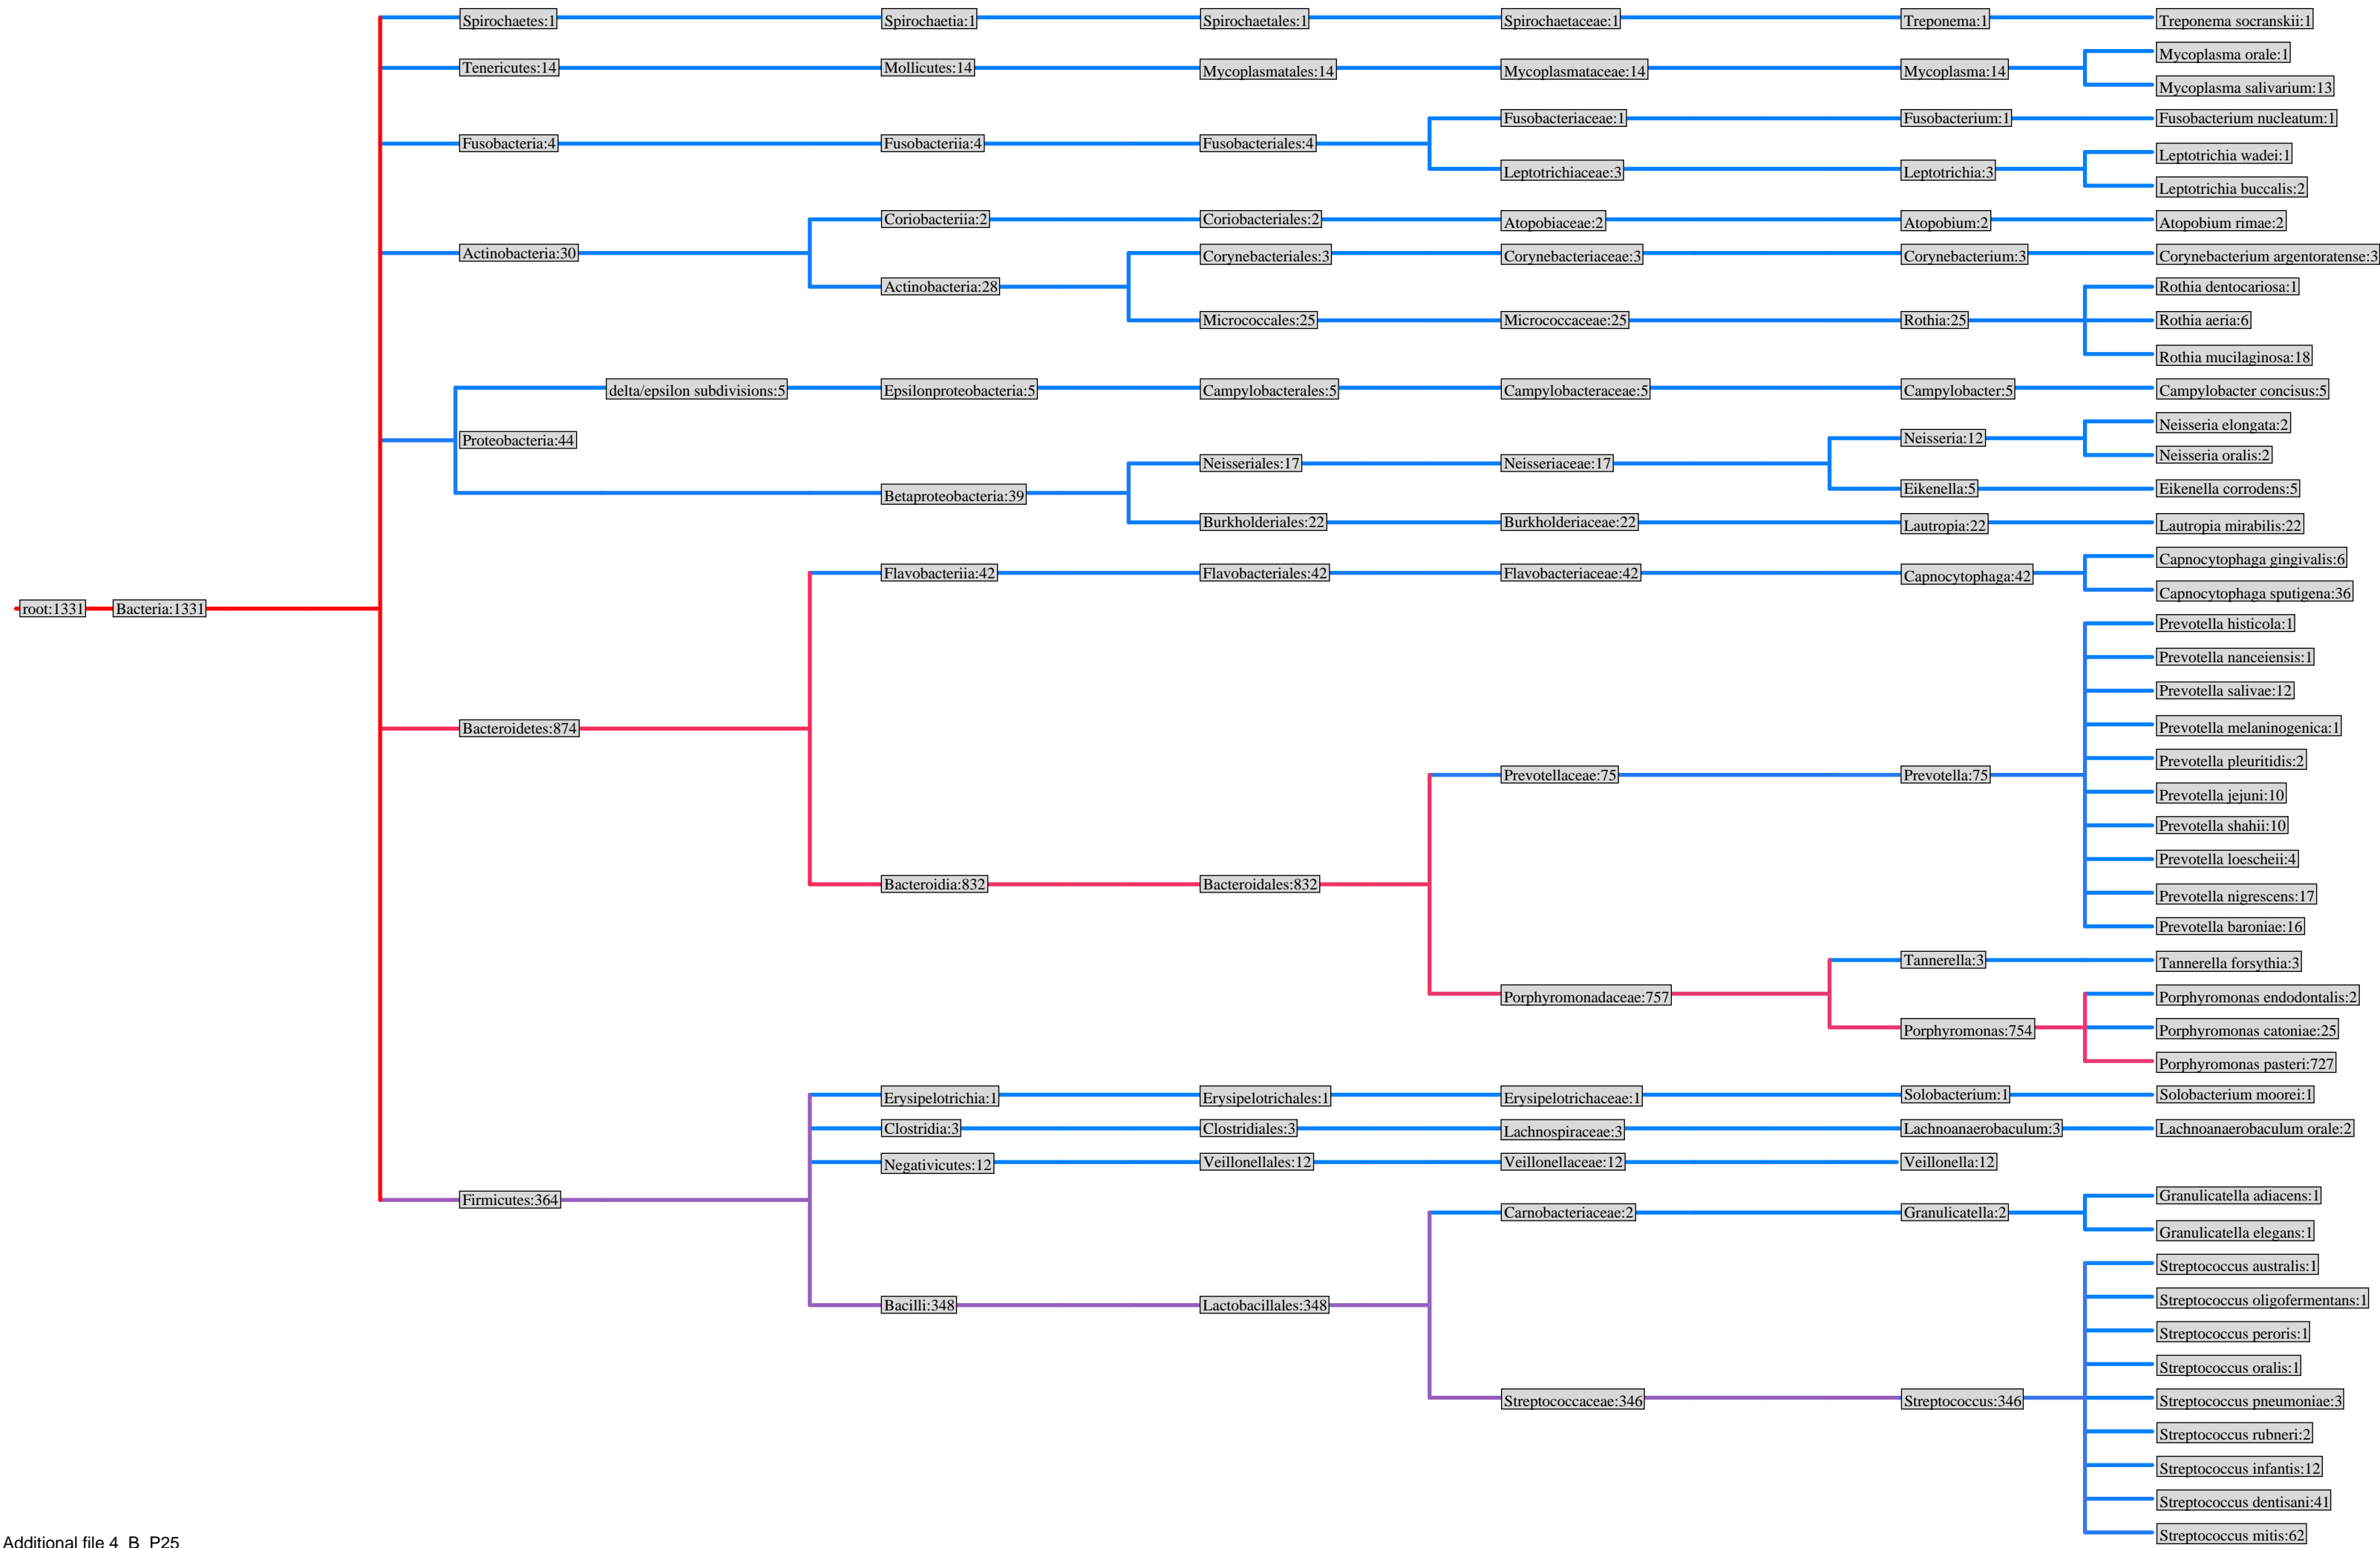

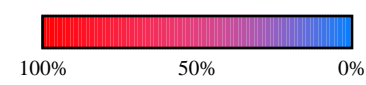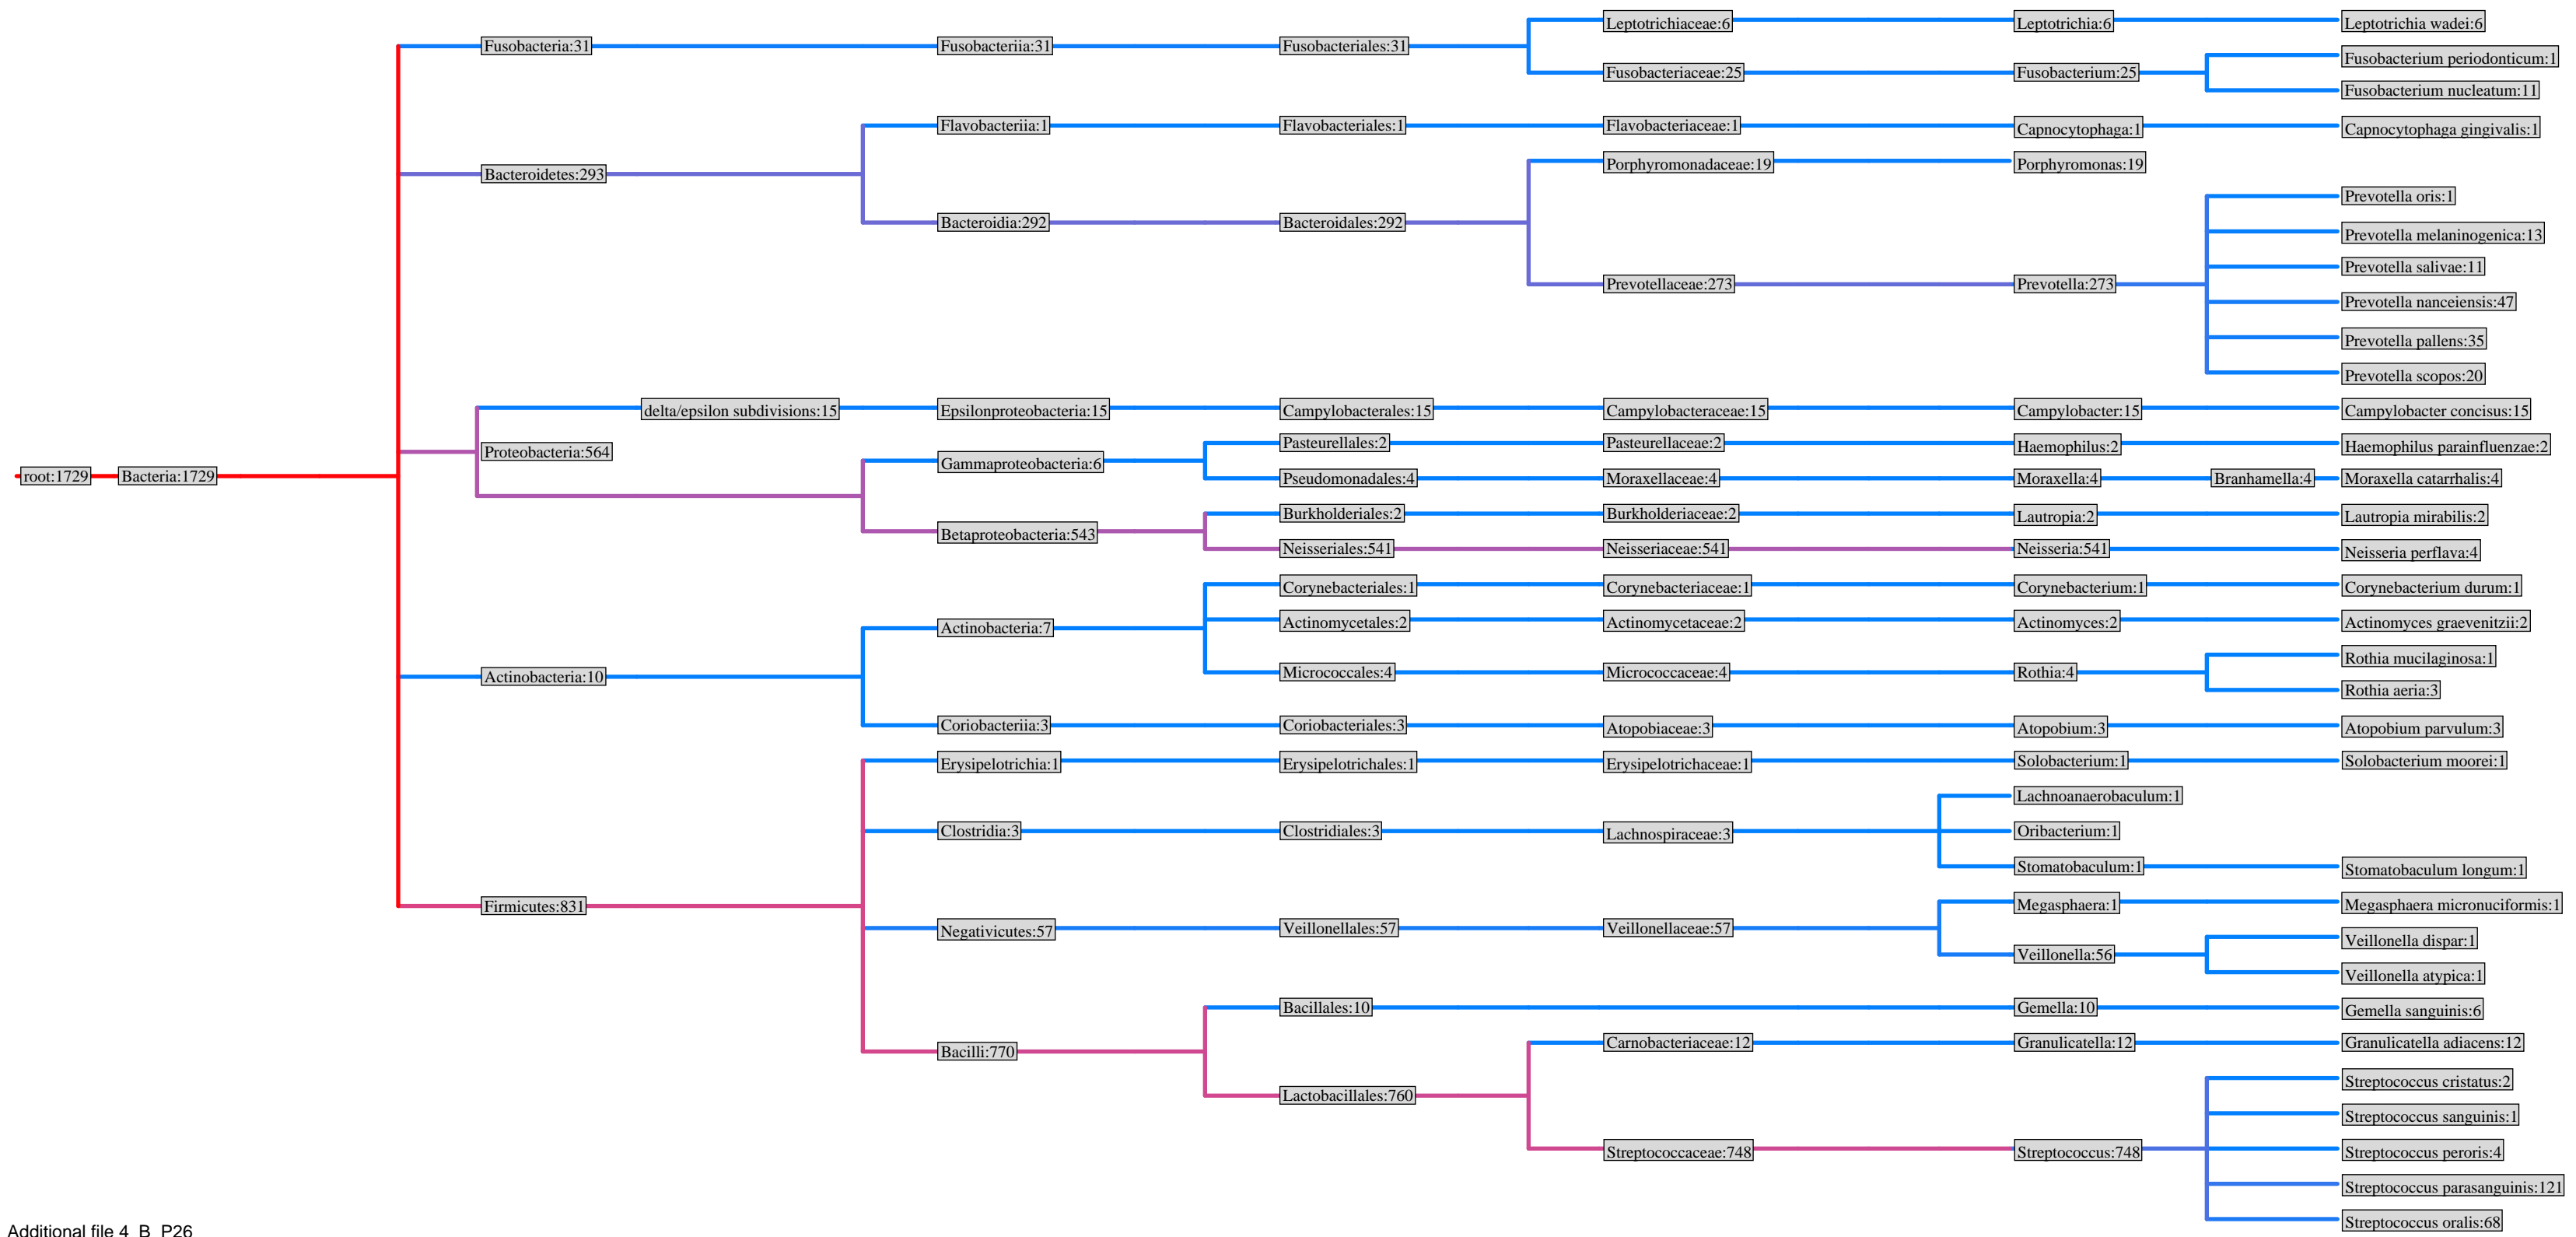

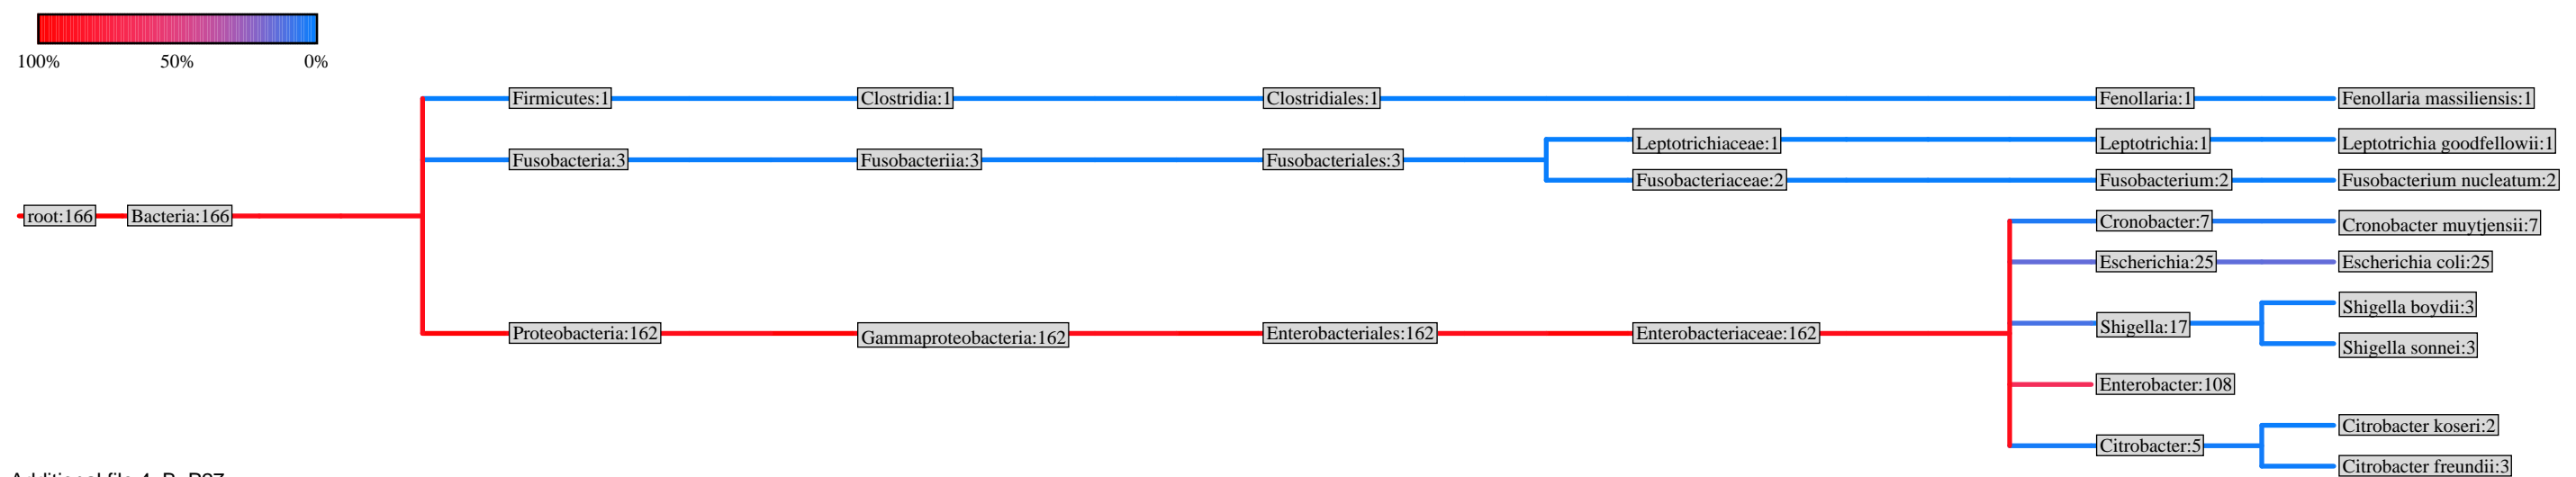

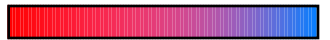

100% 50% 0%

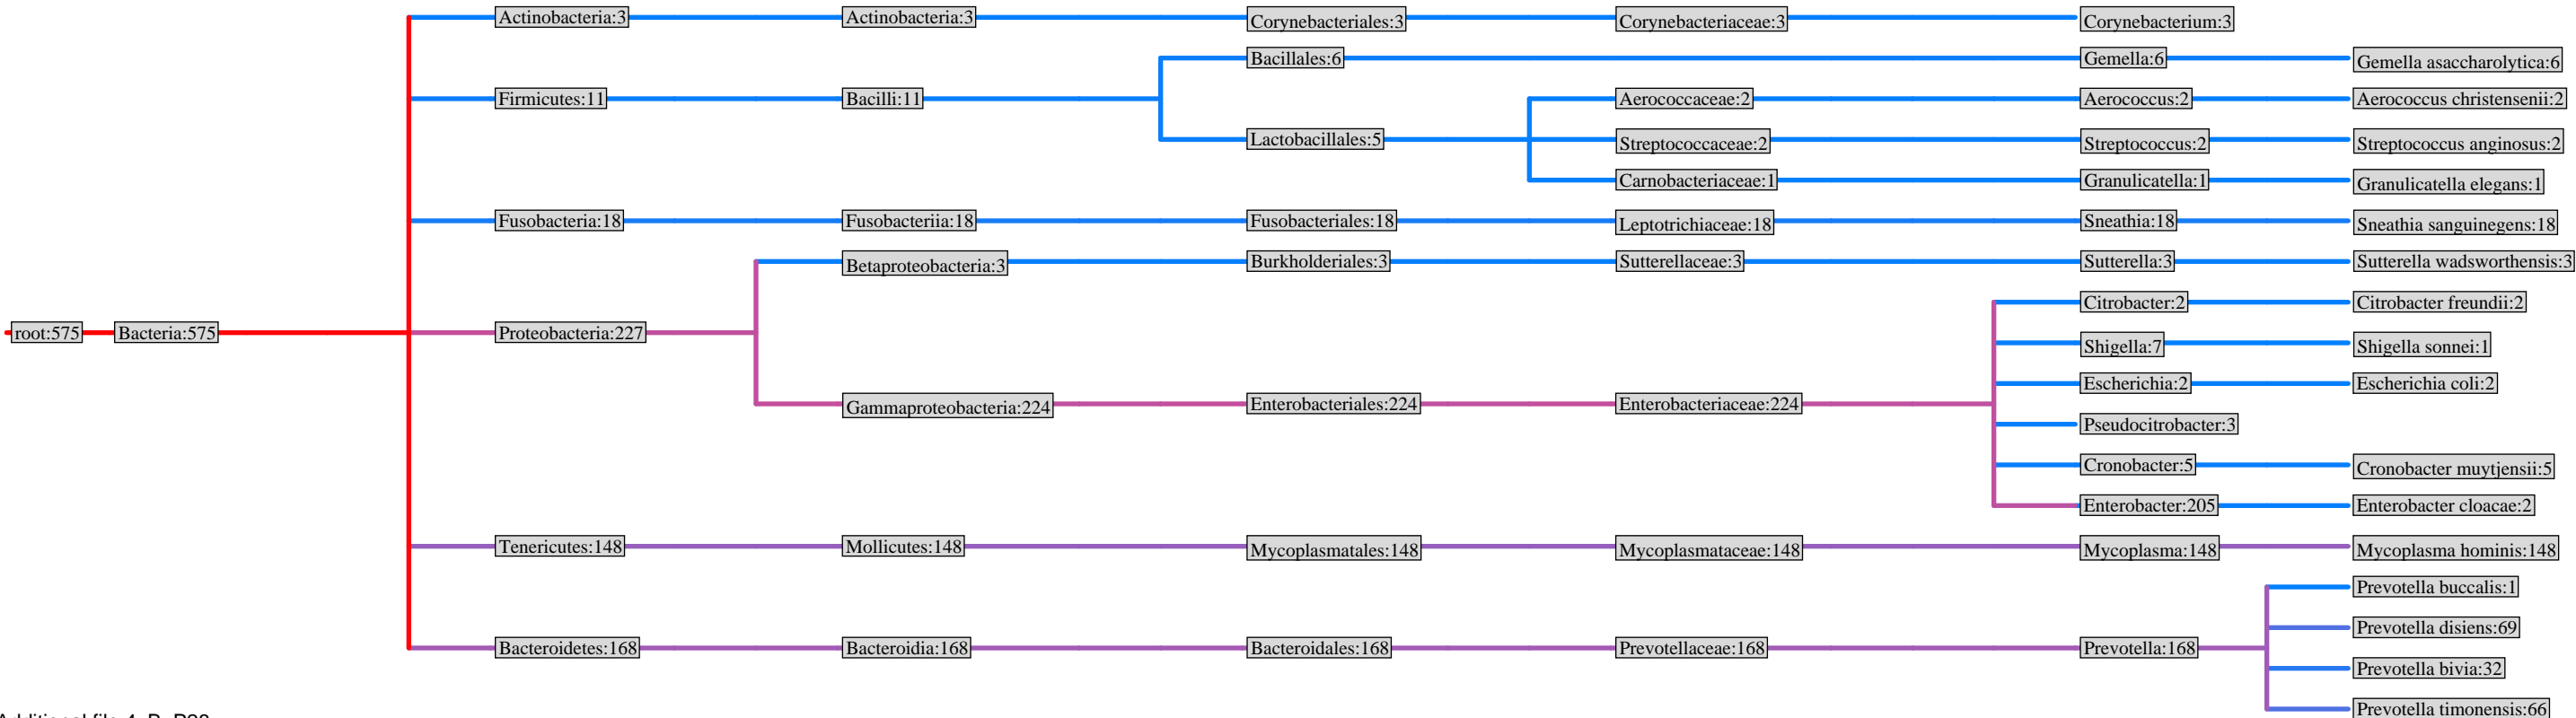



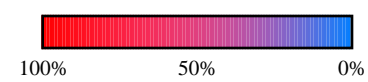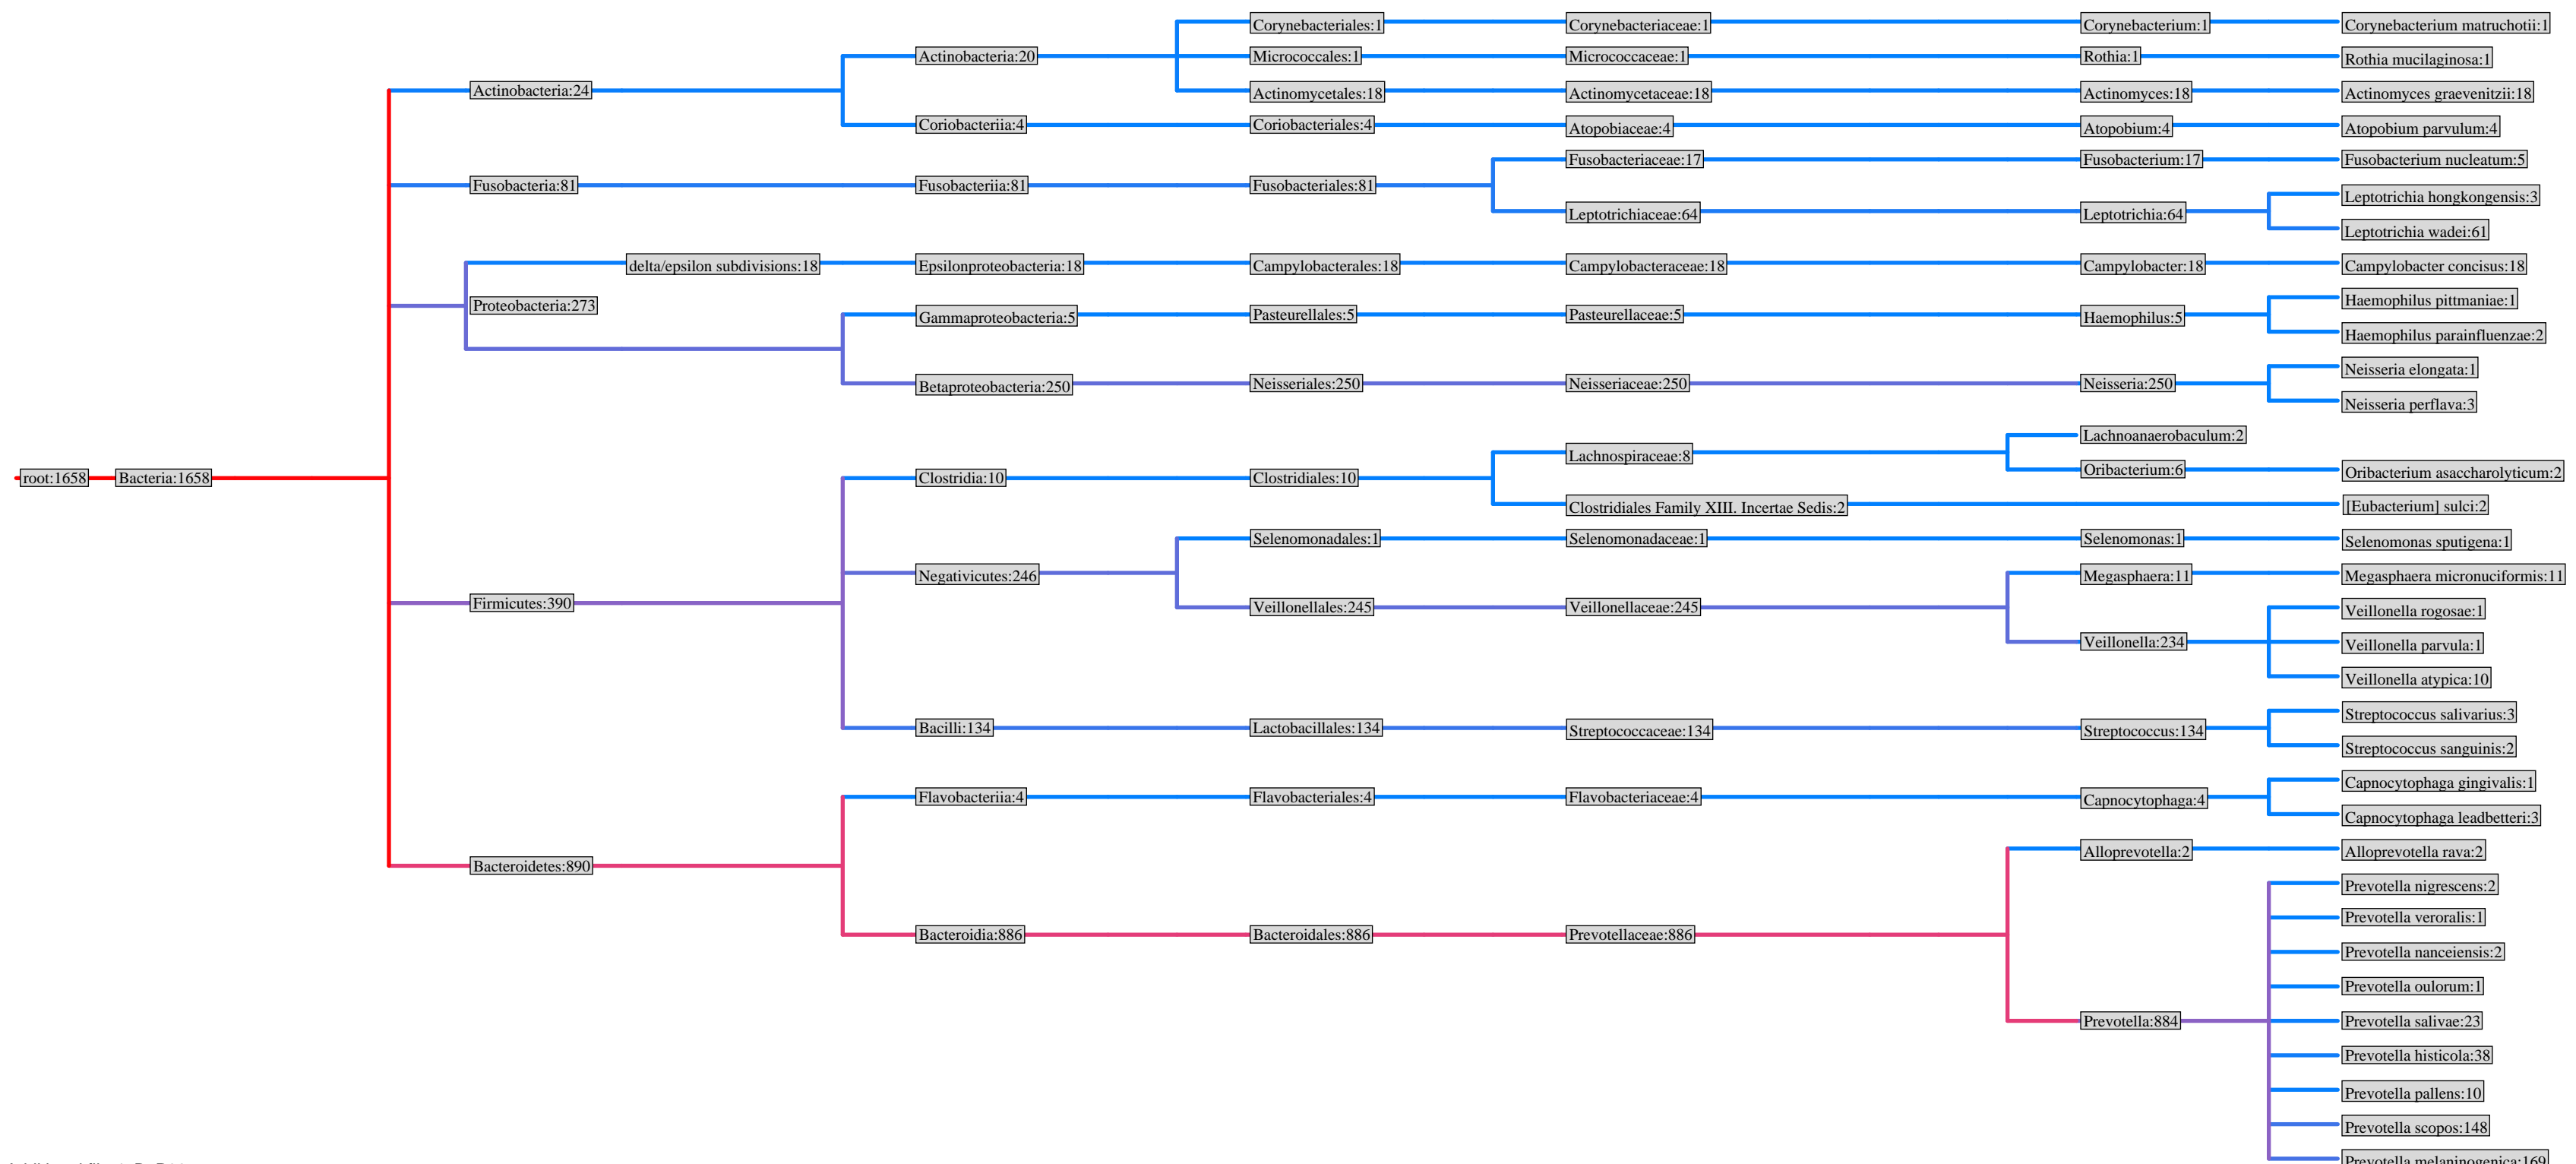

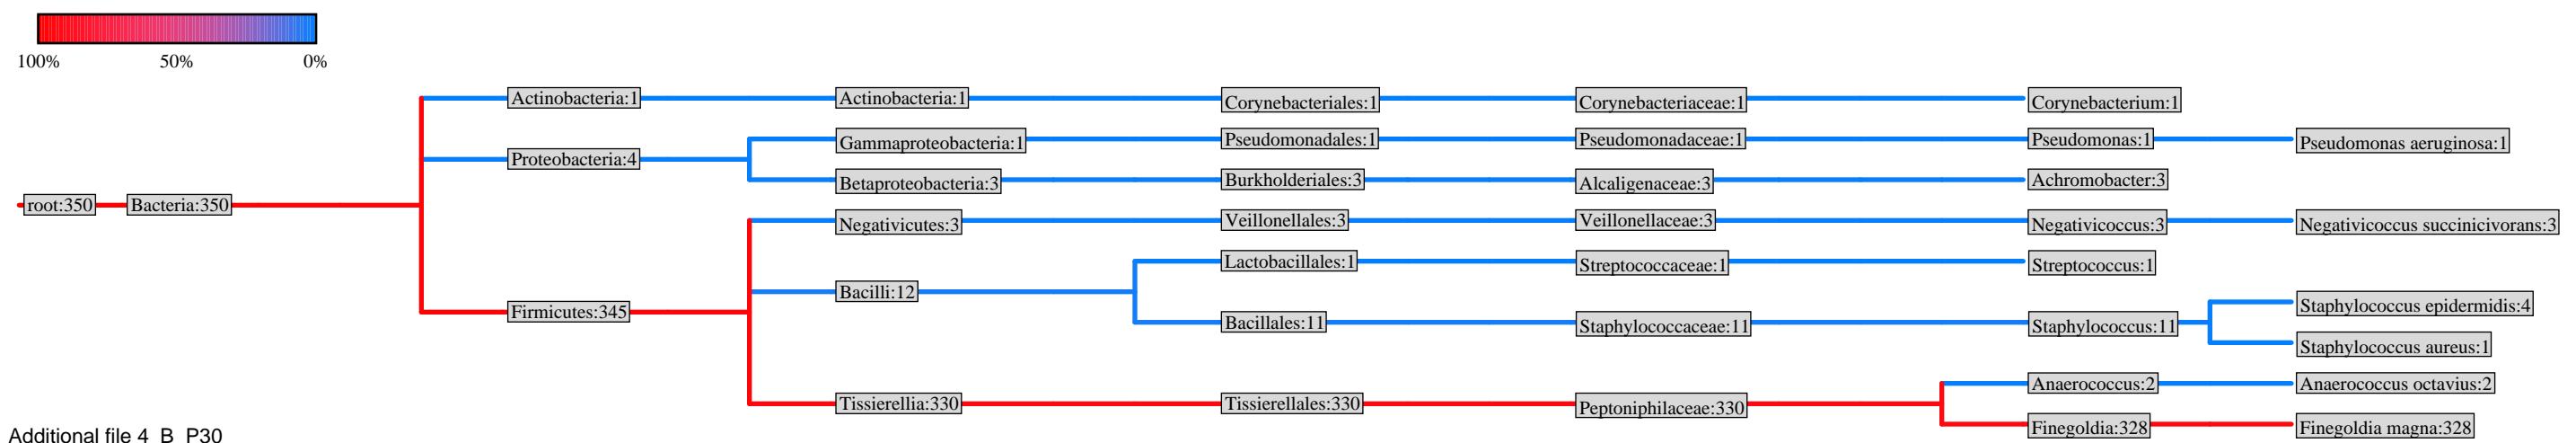

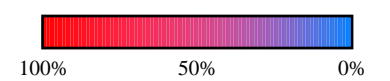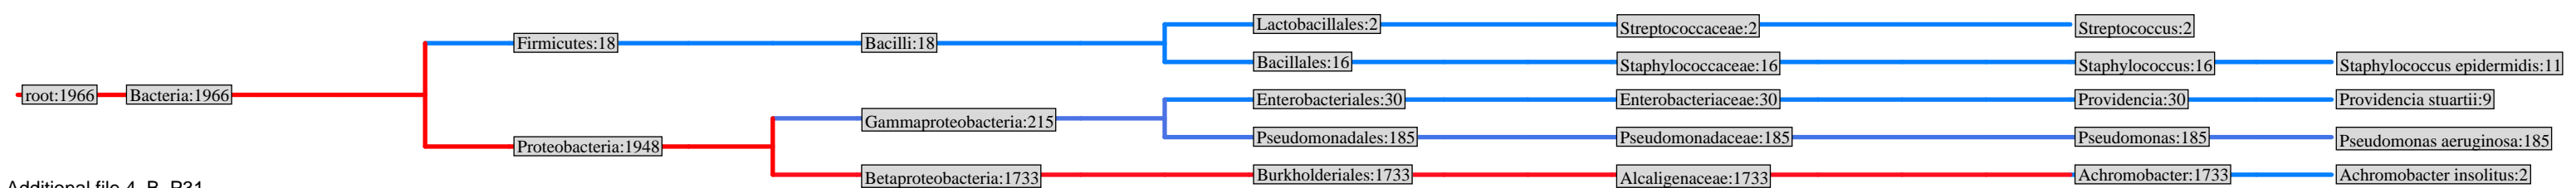

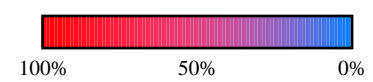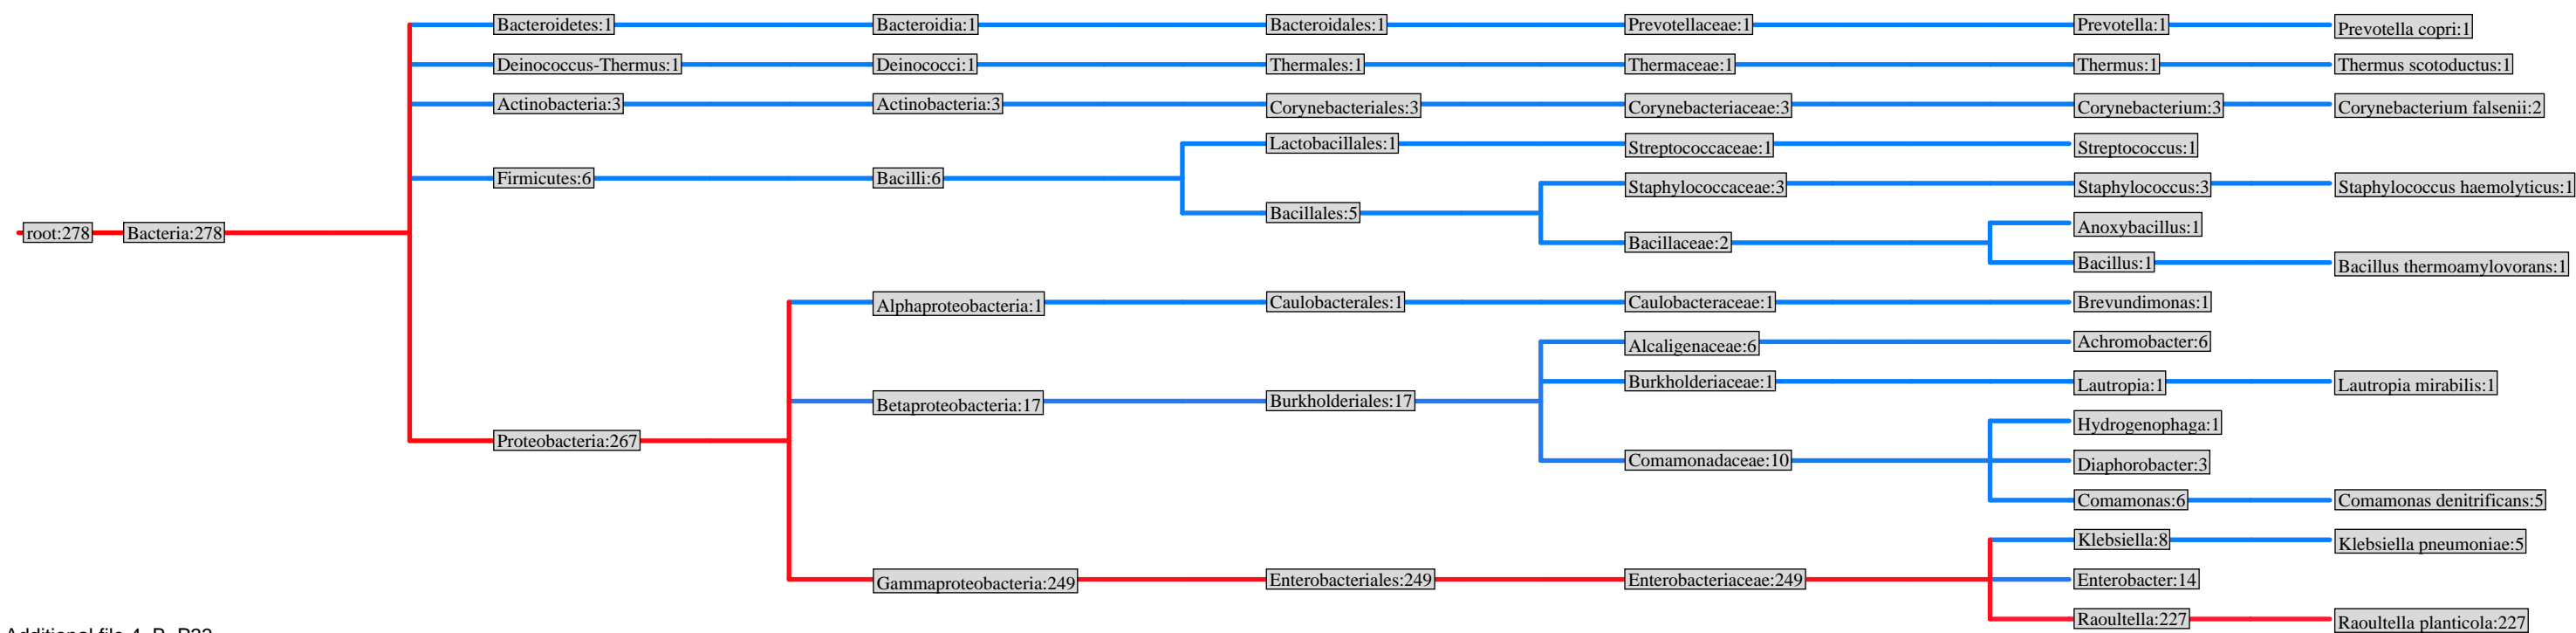

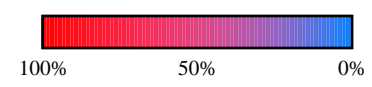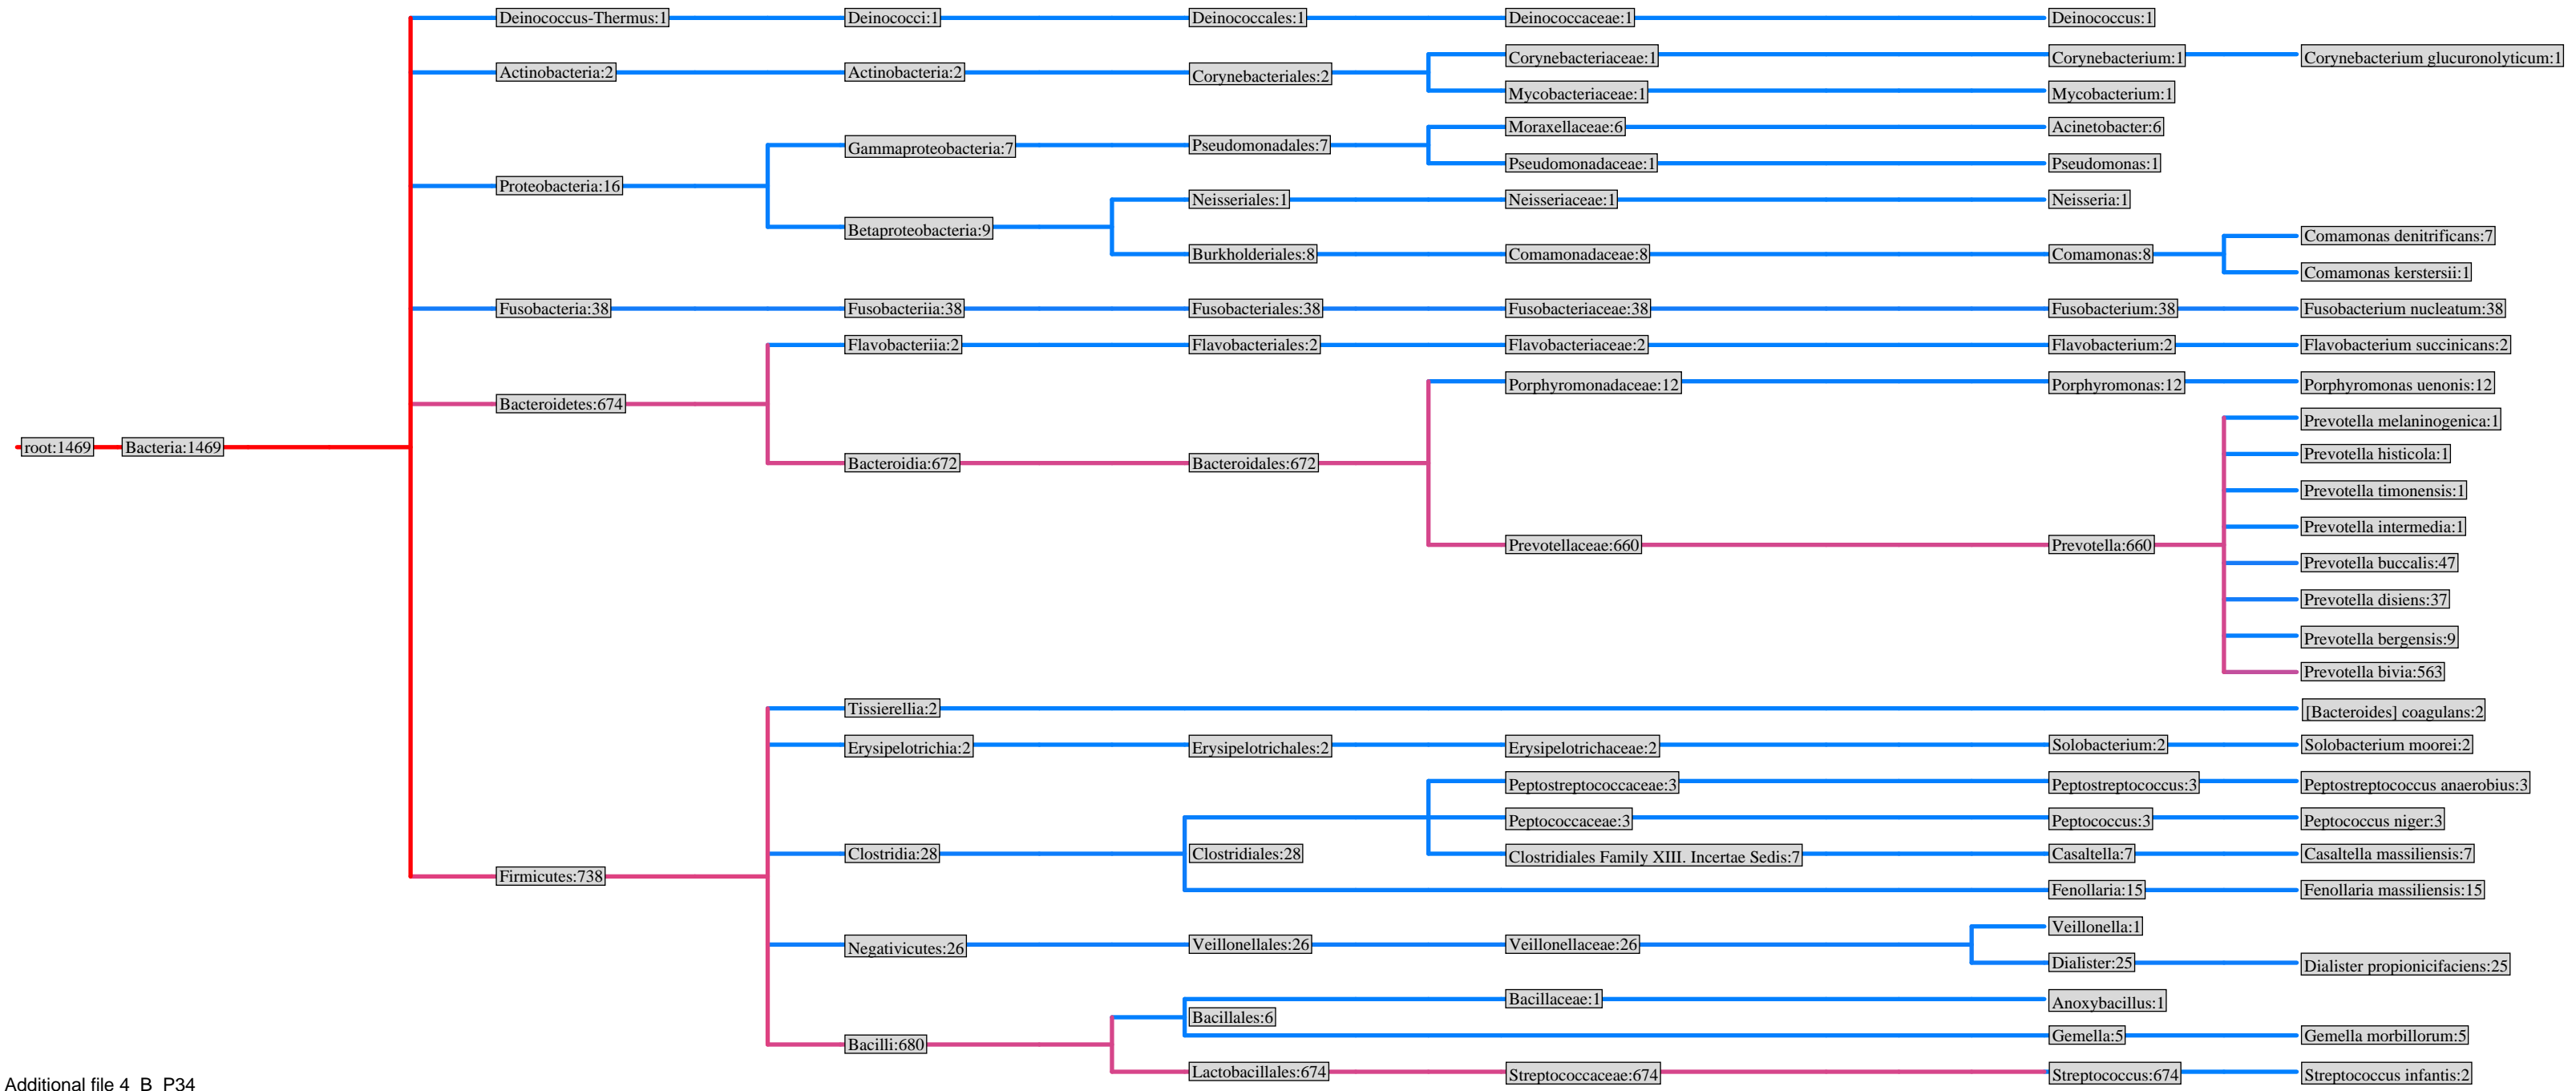

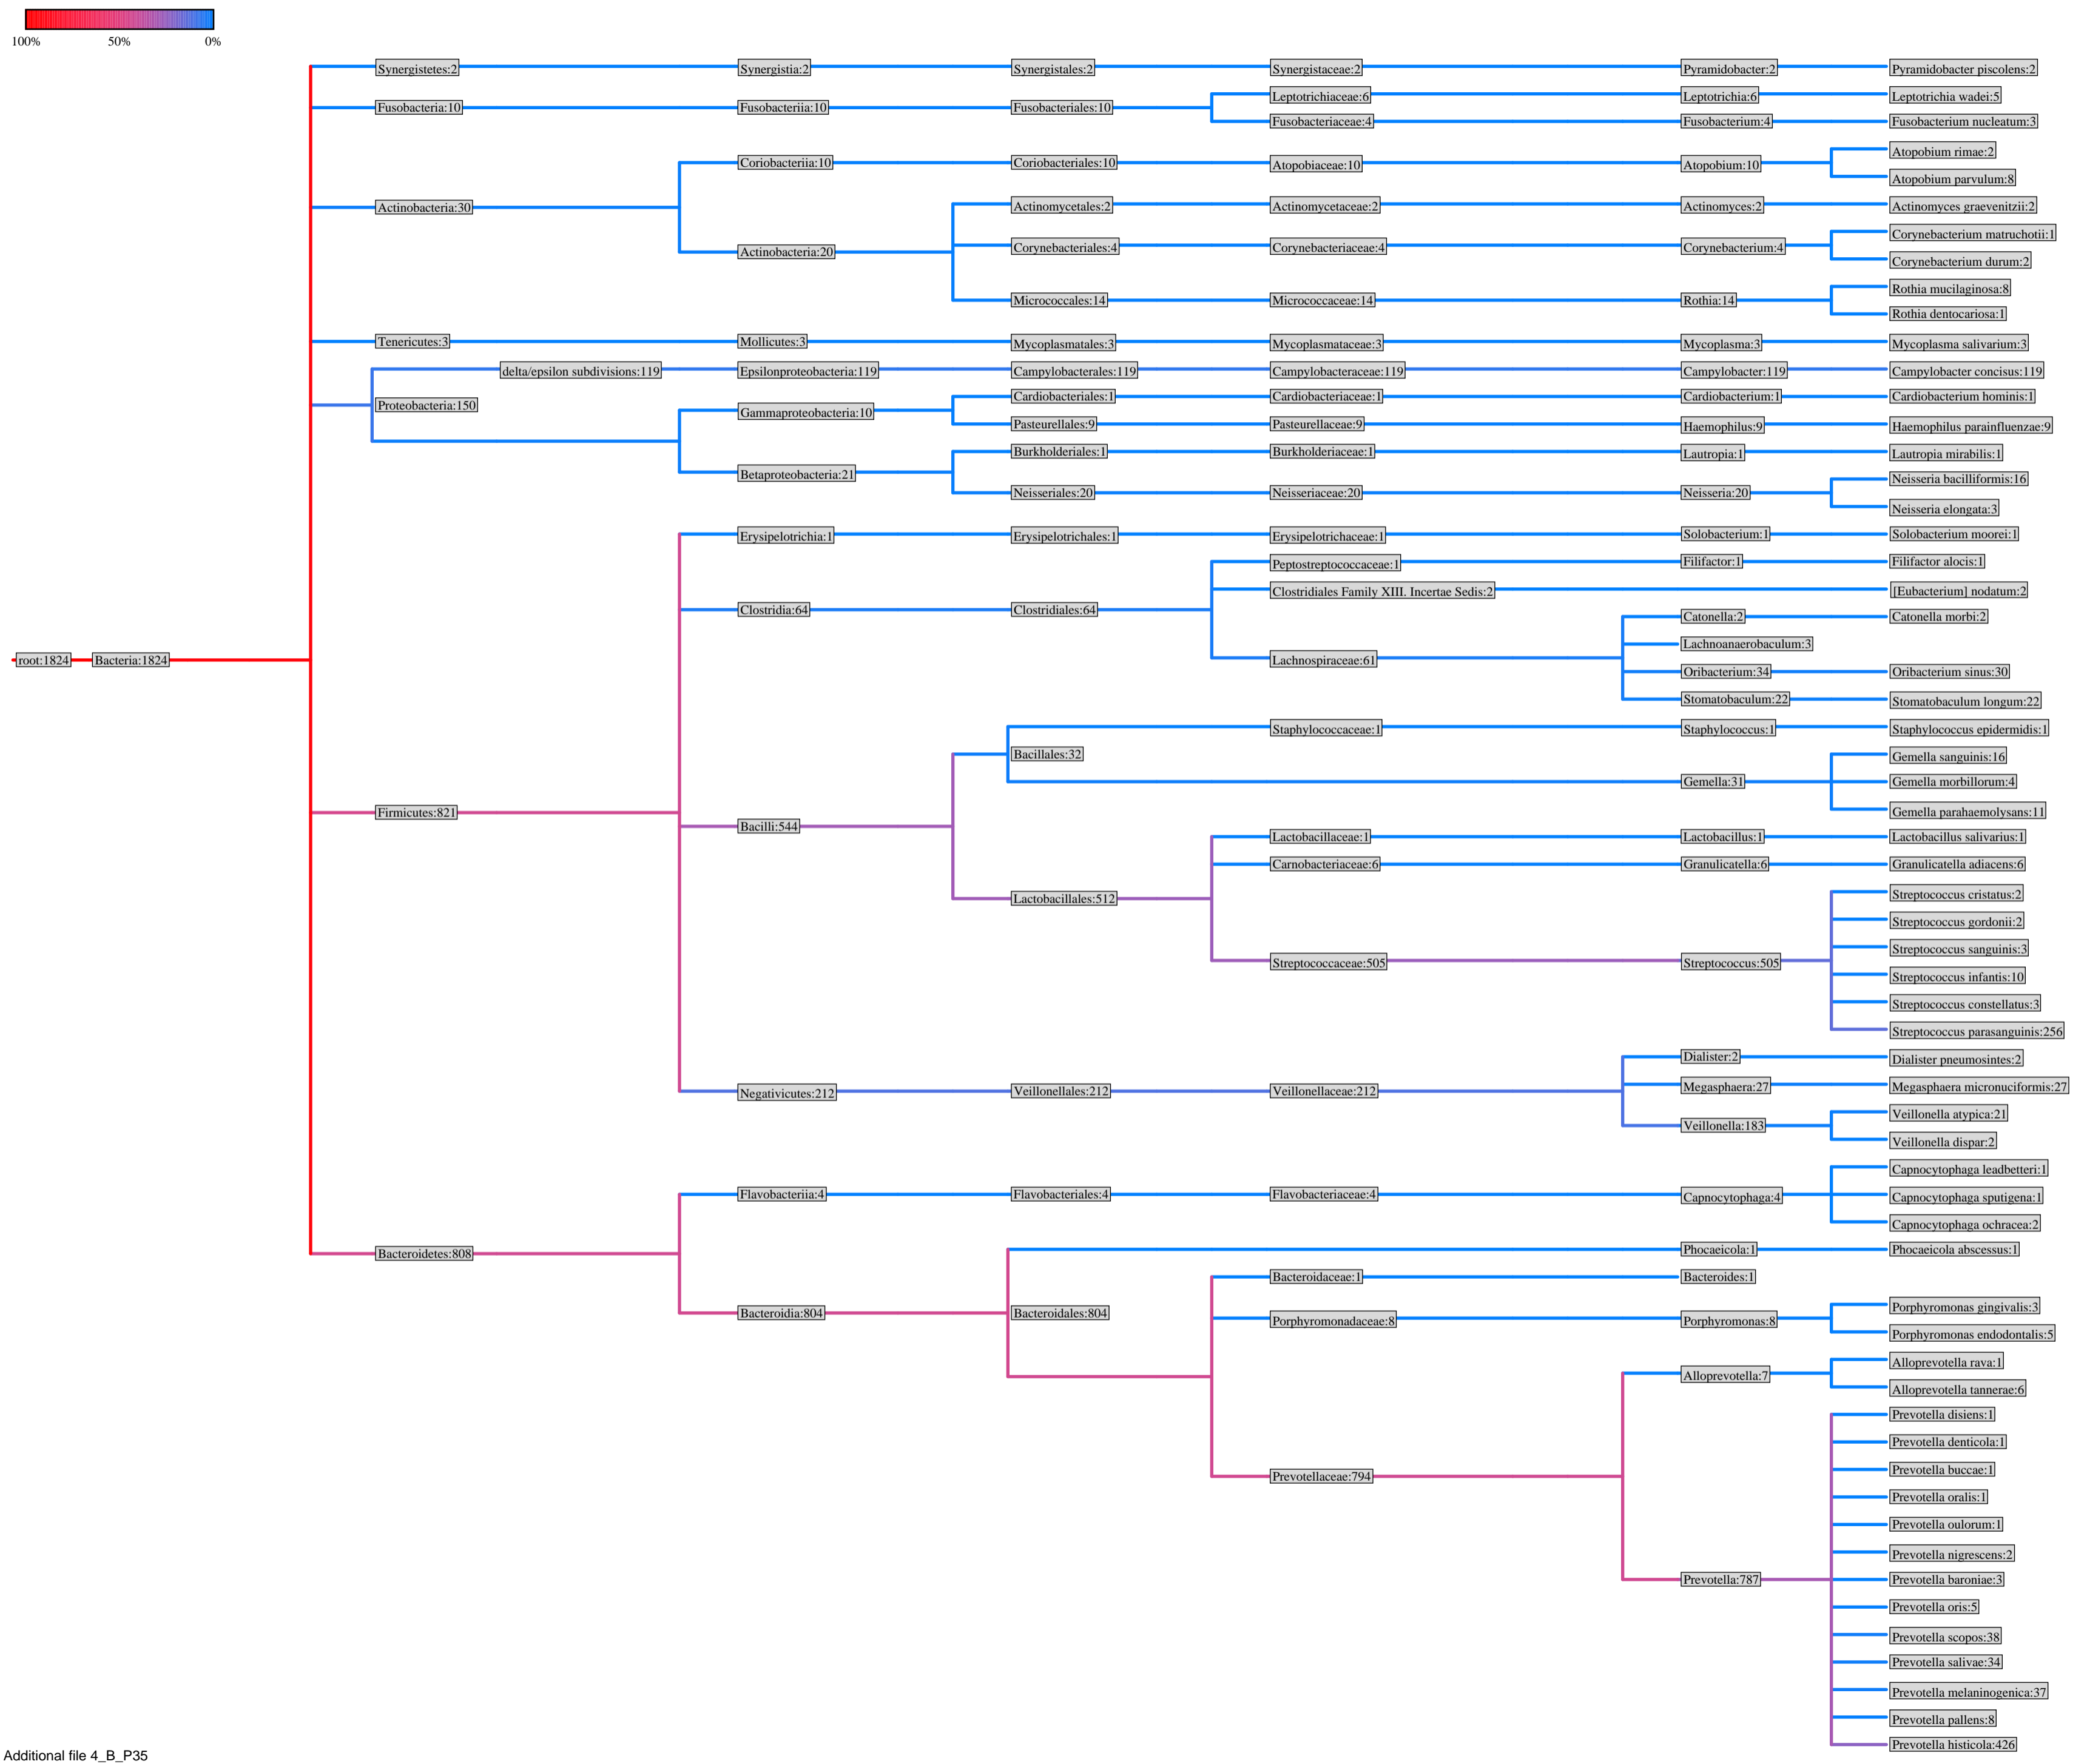

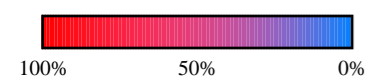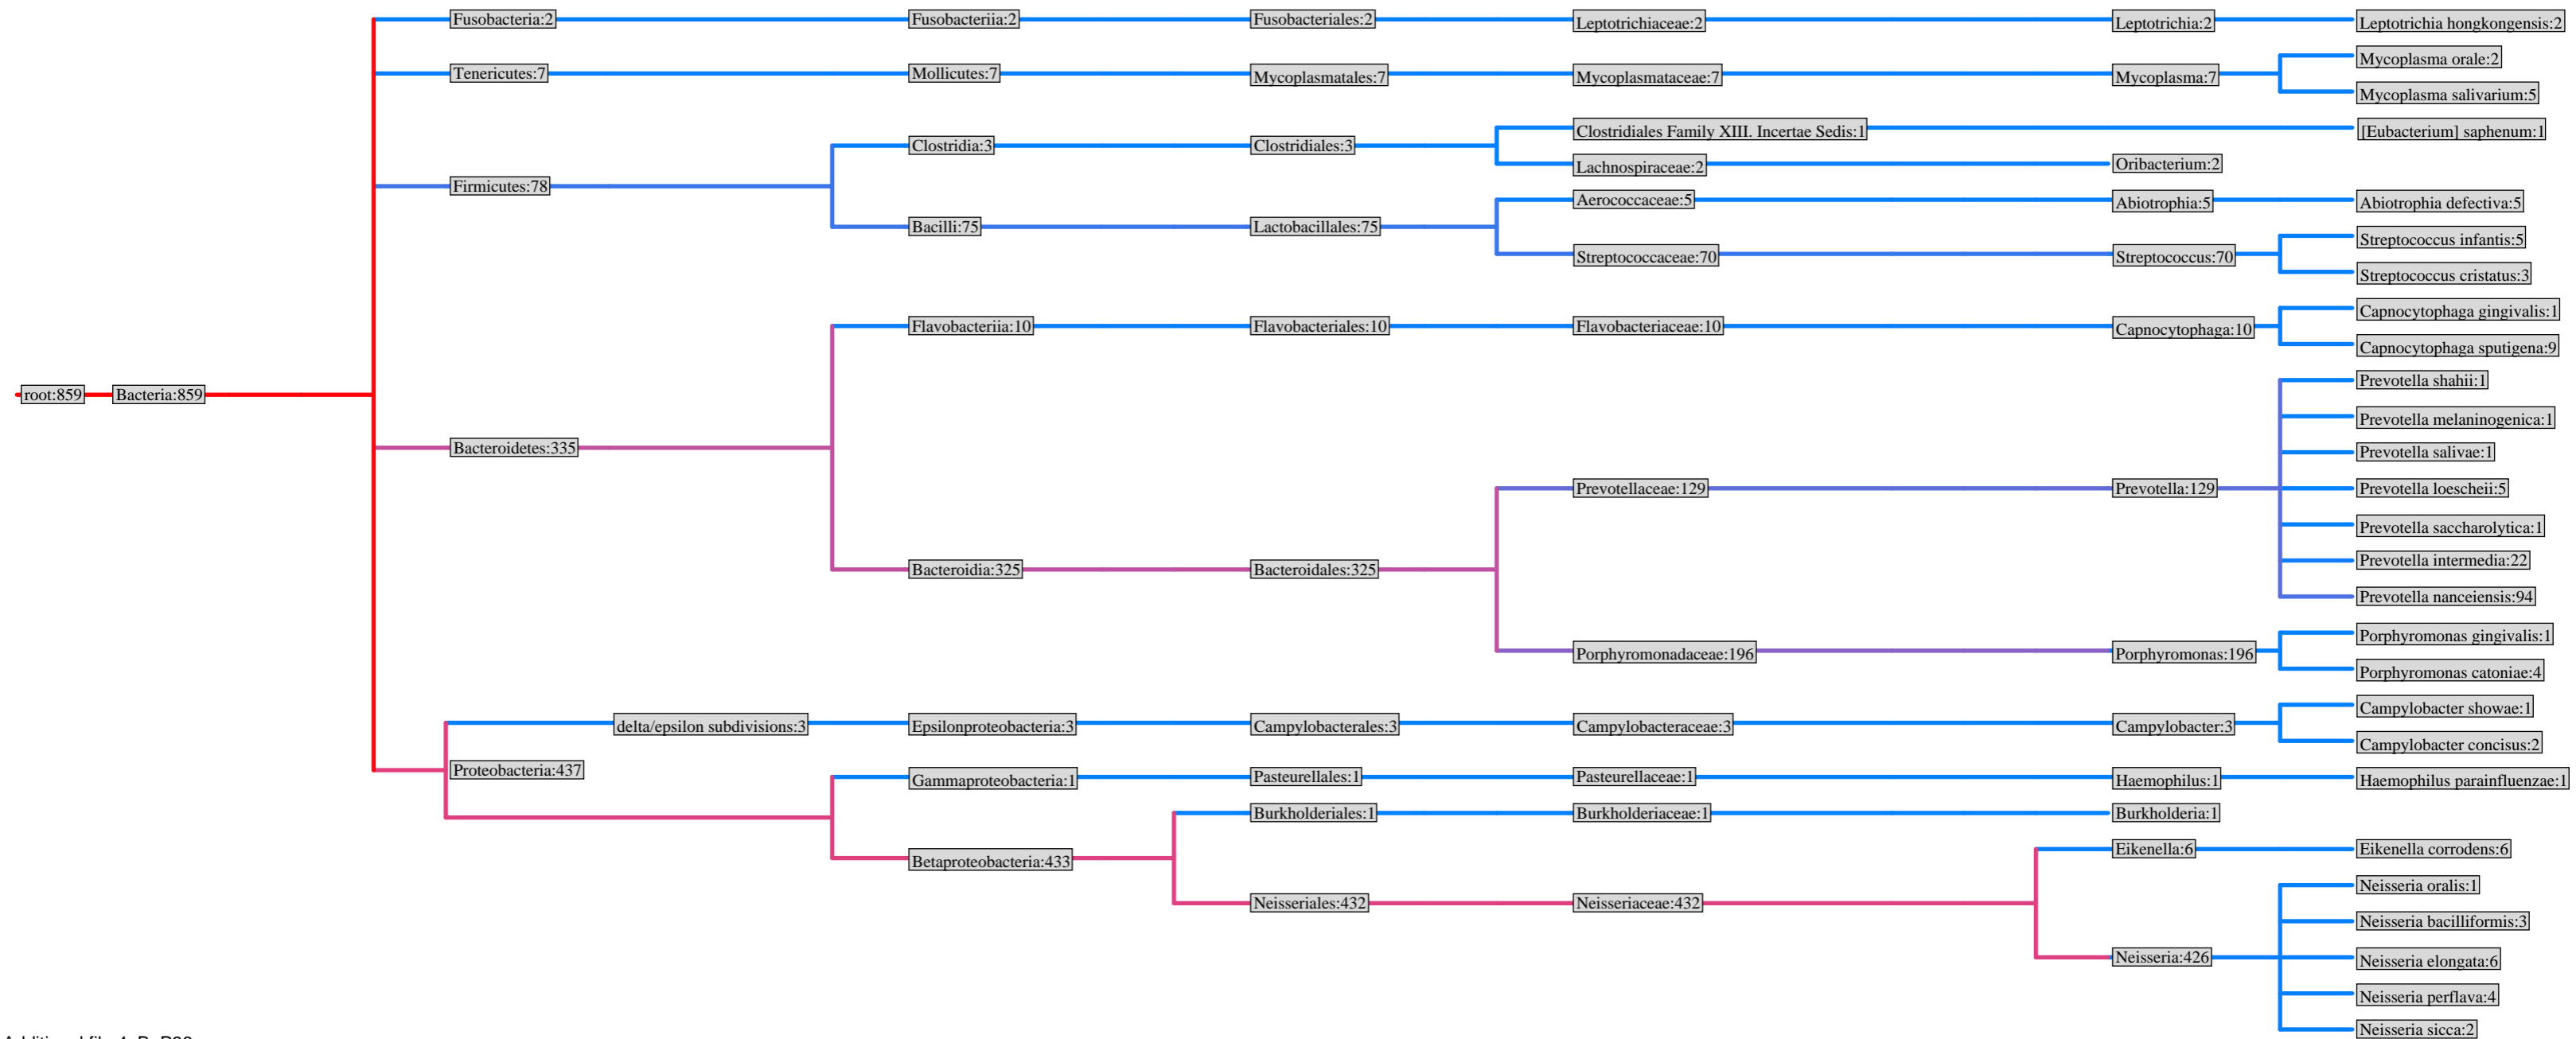

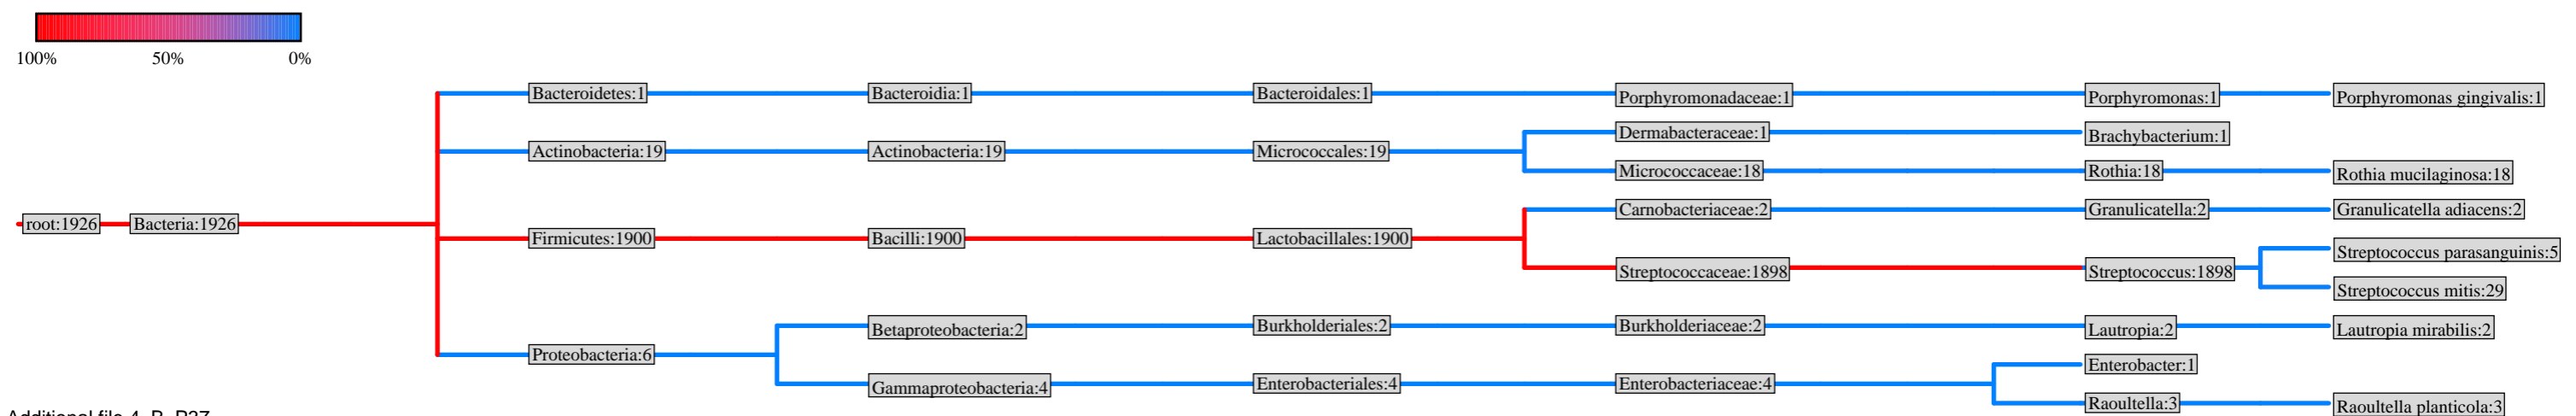



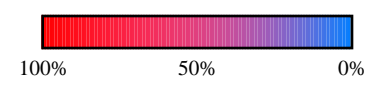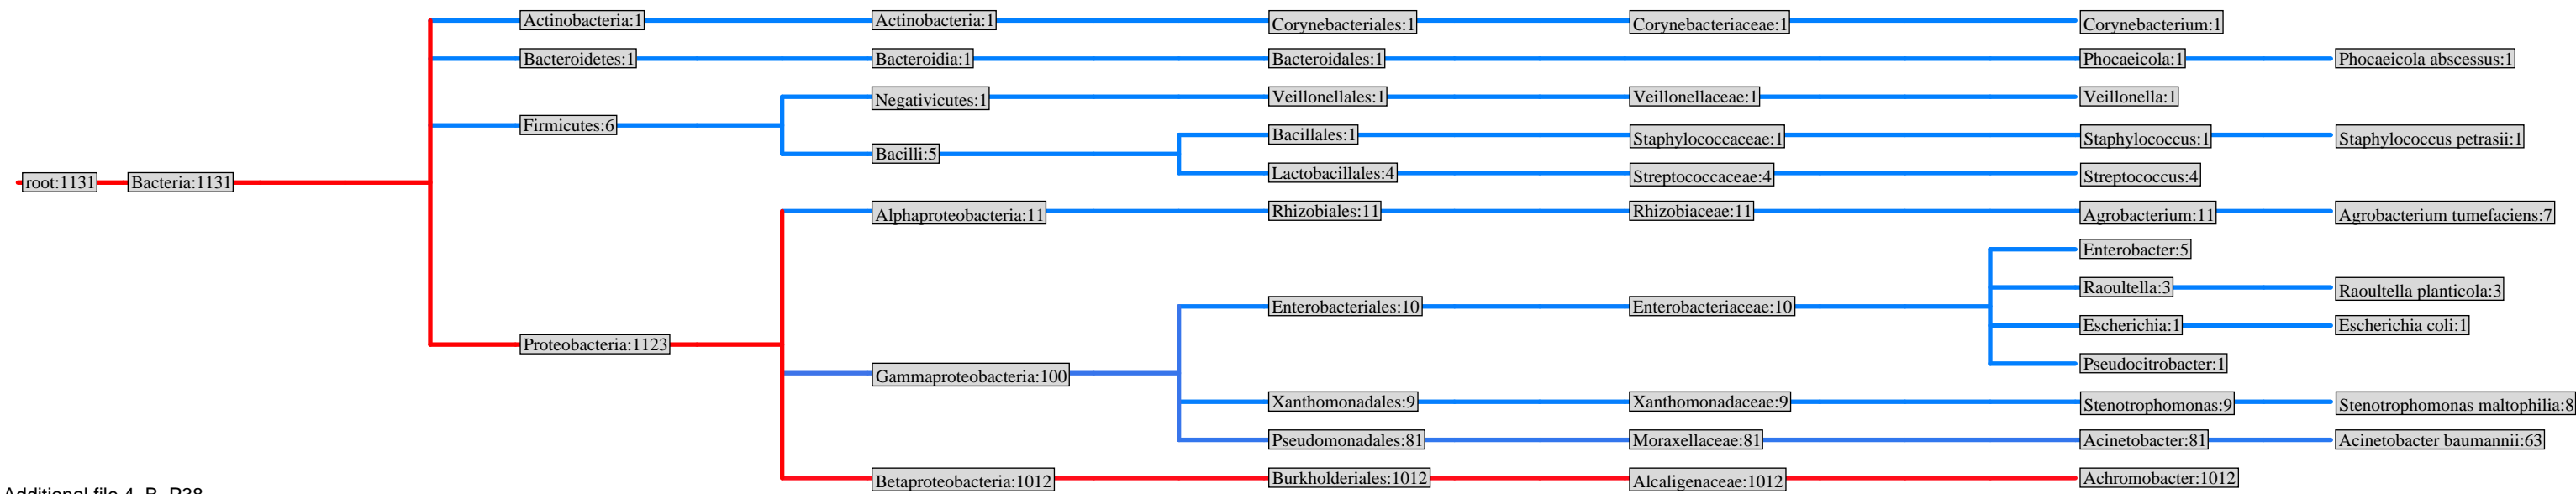

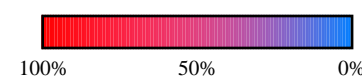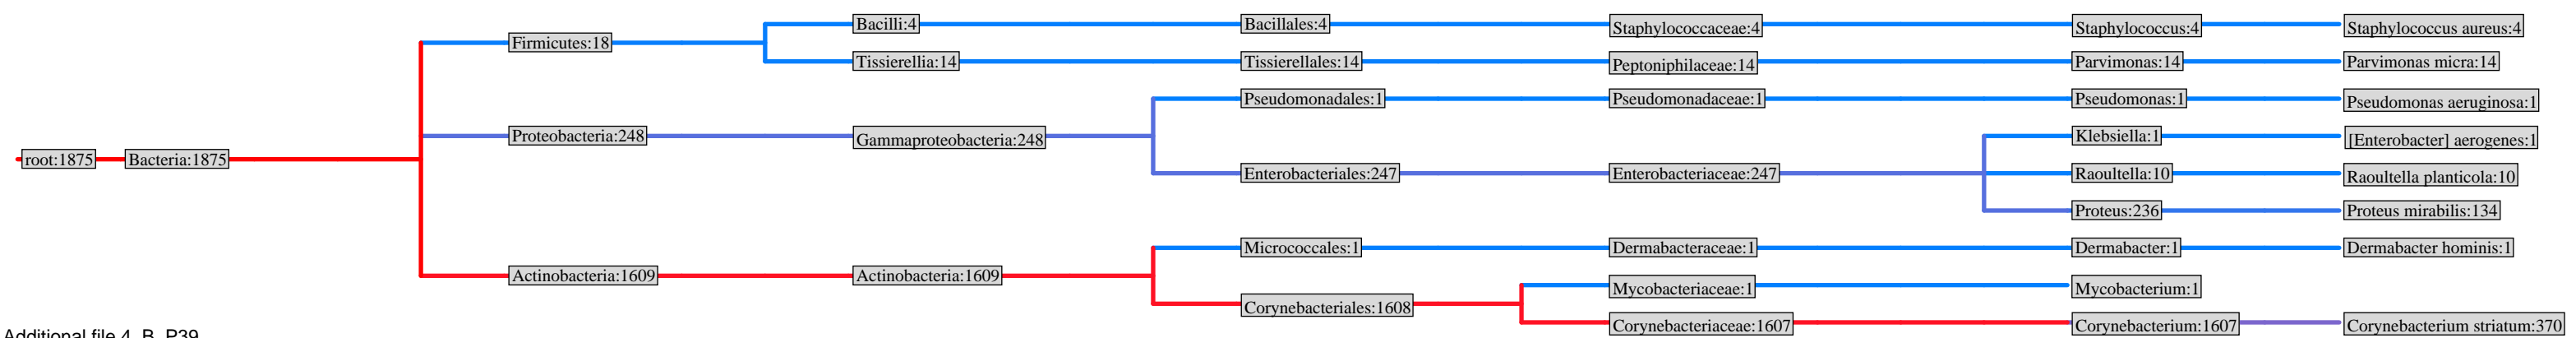

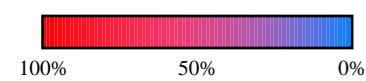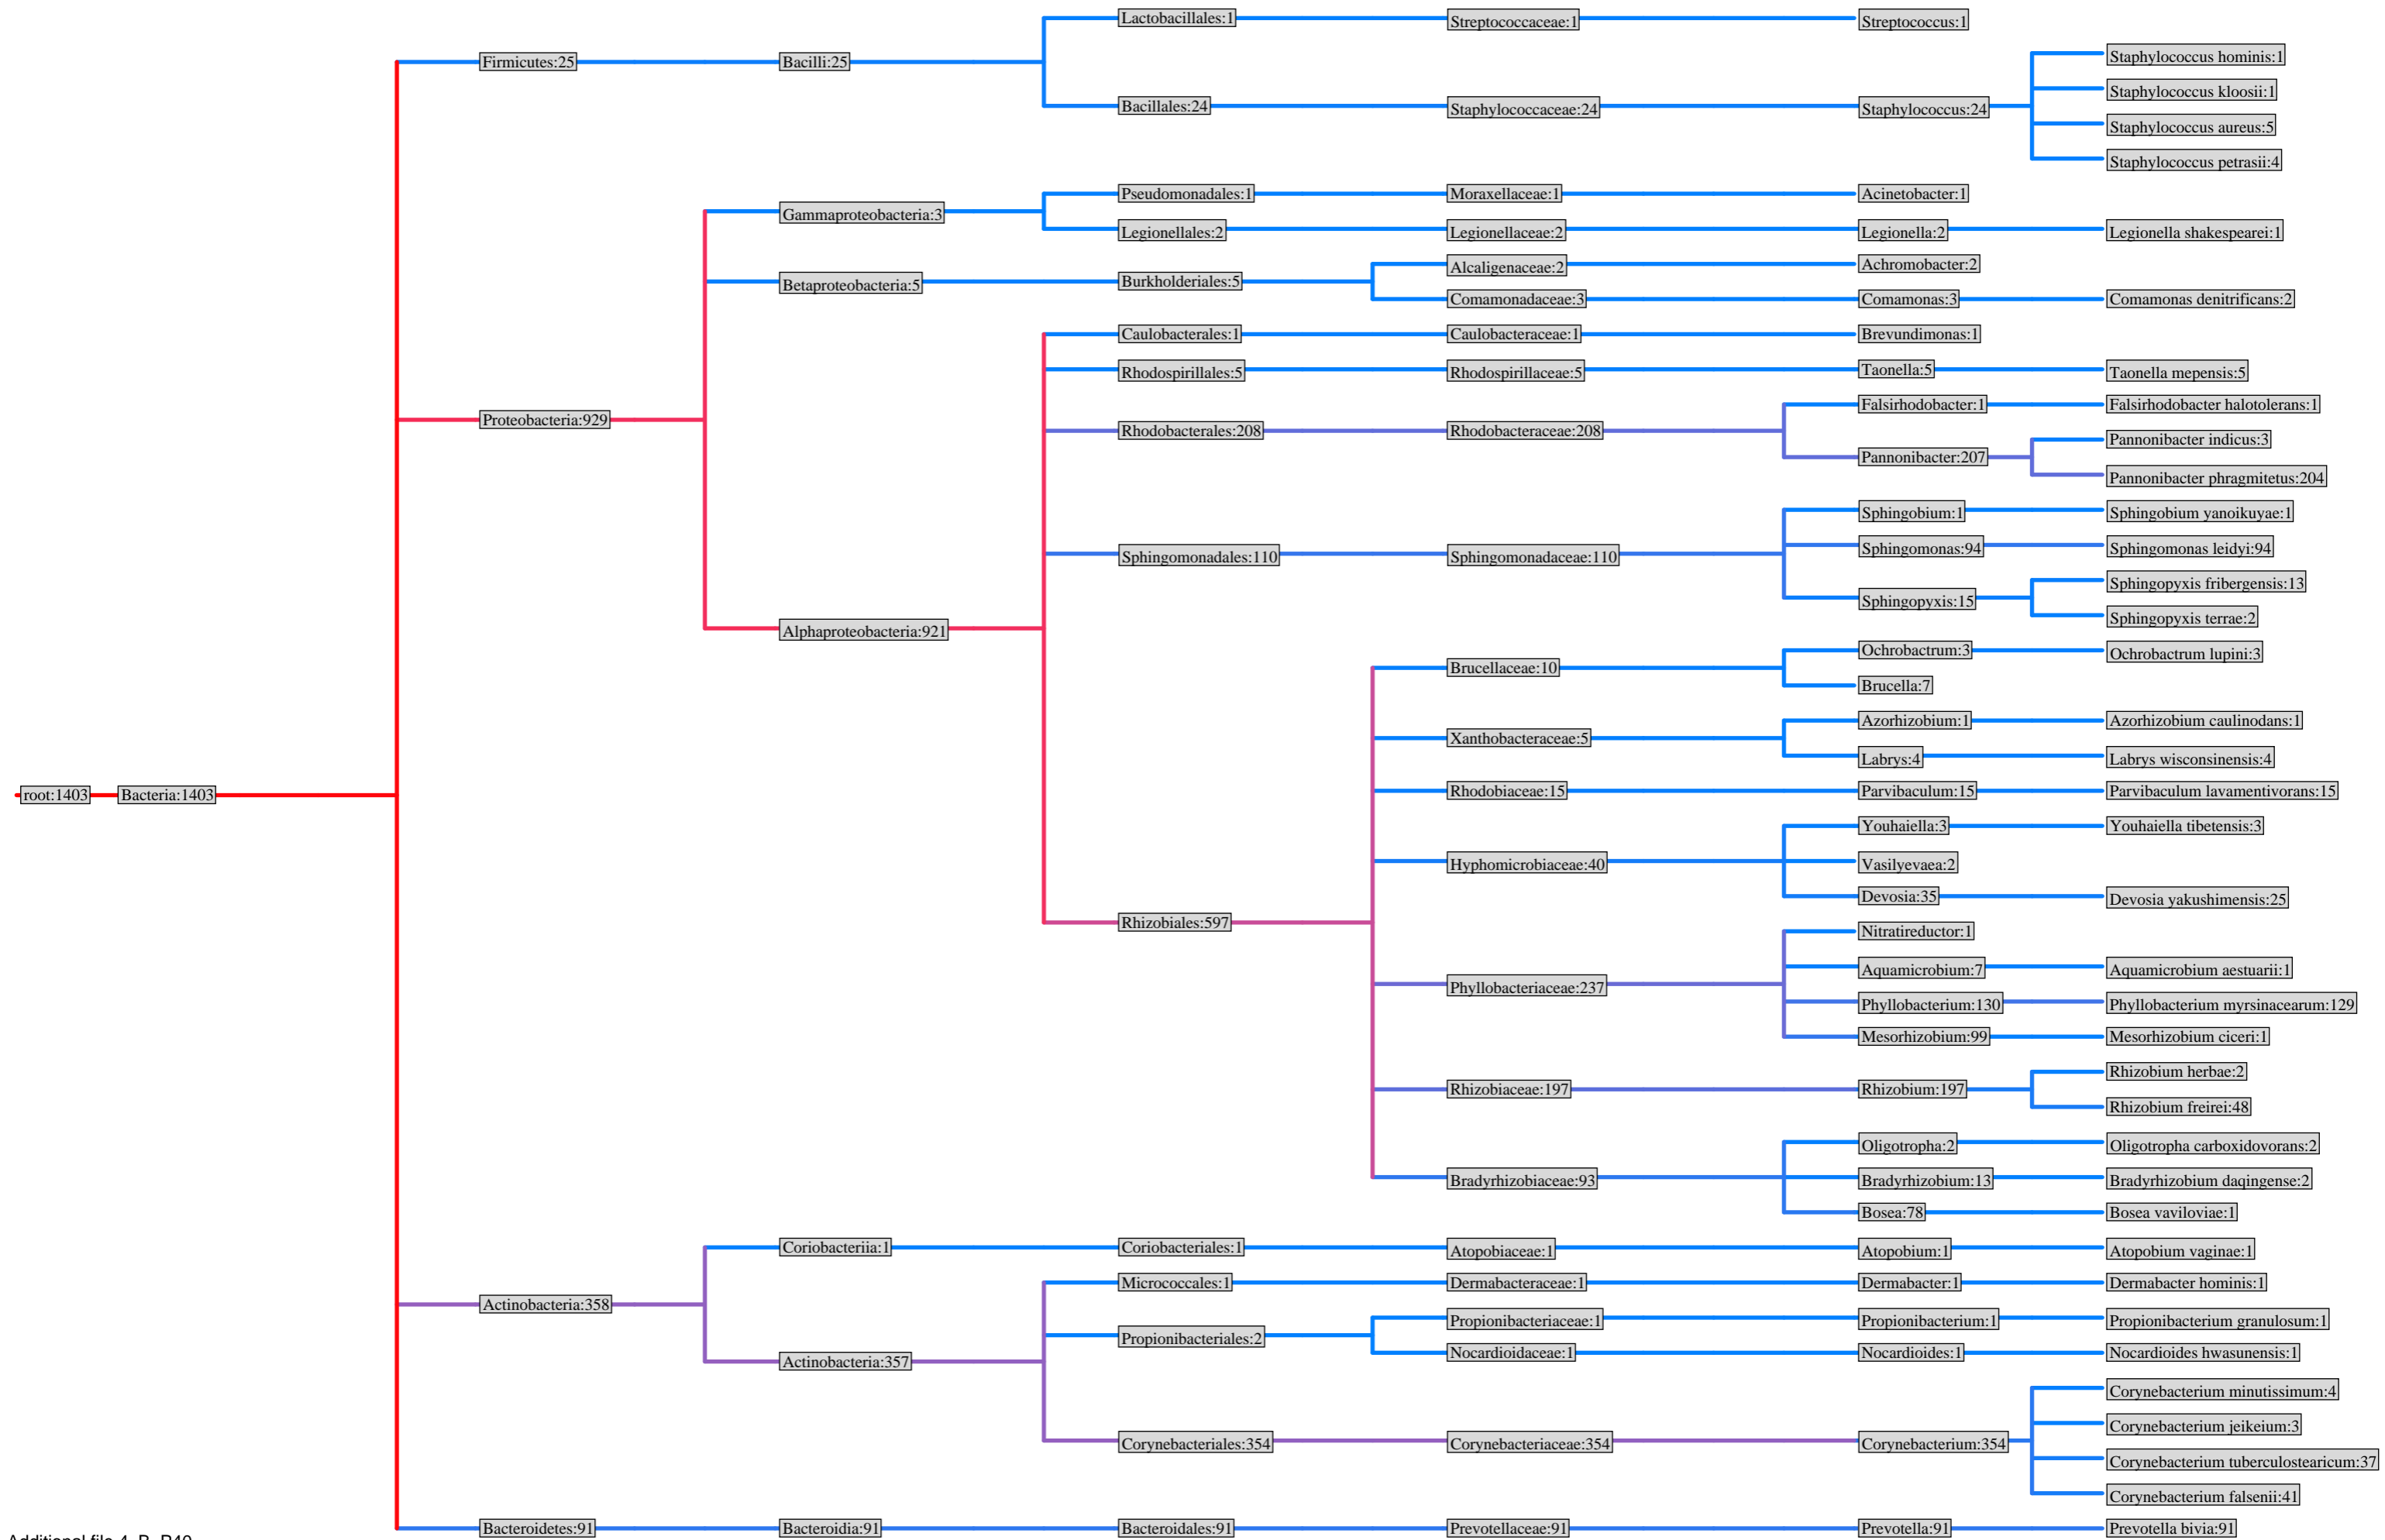

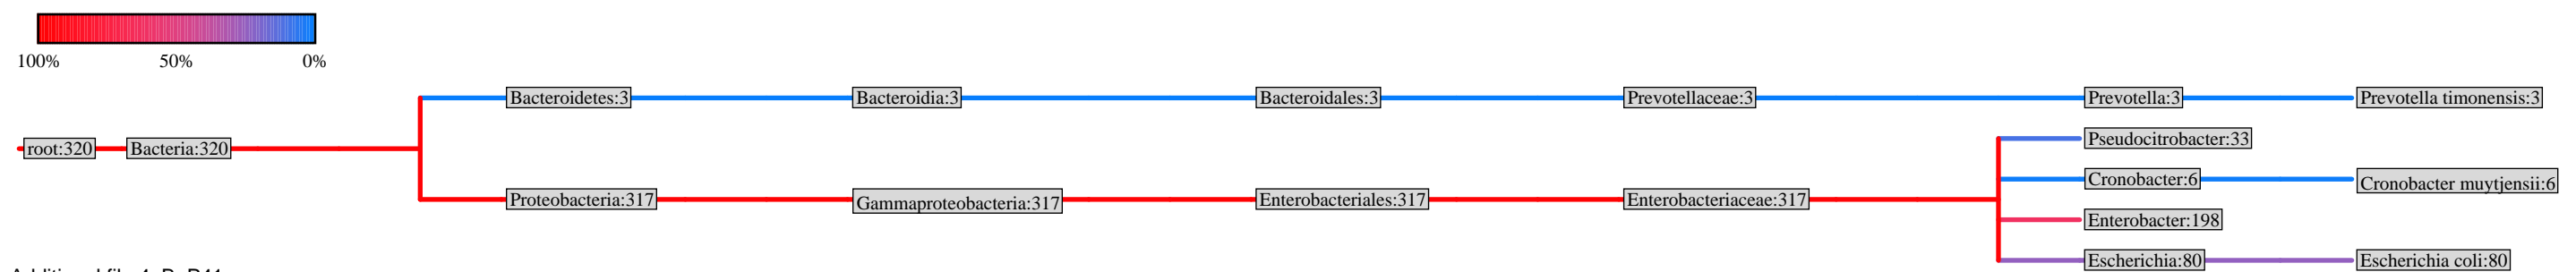

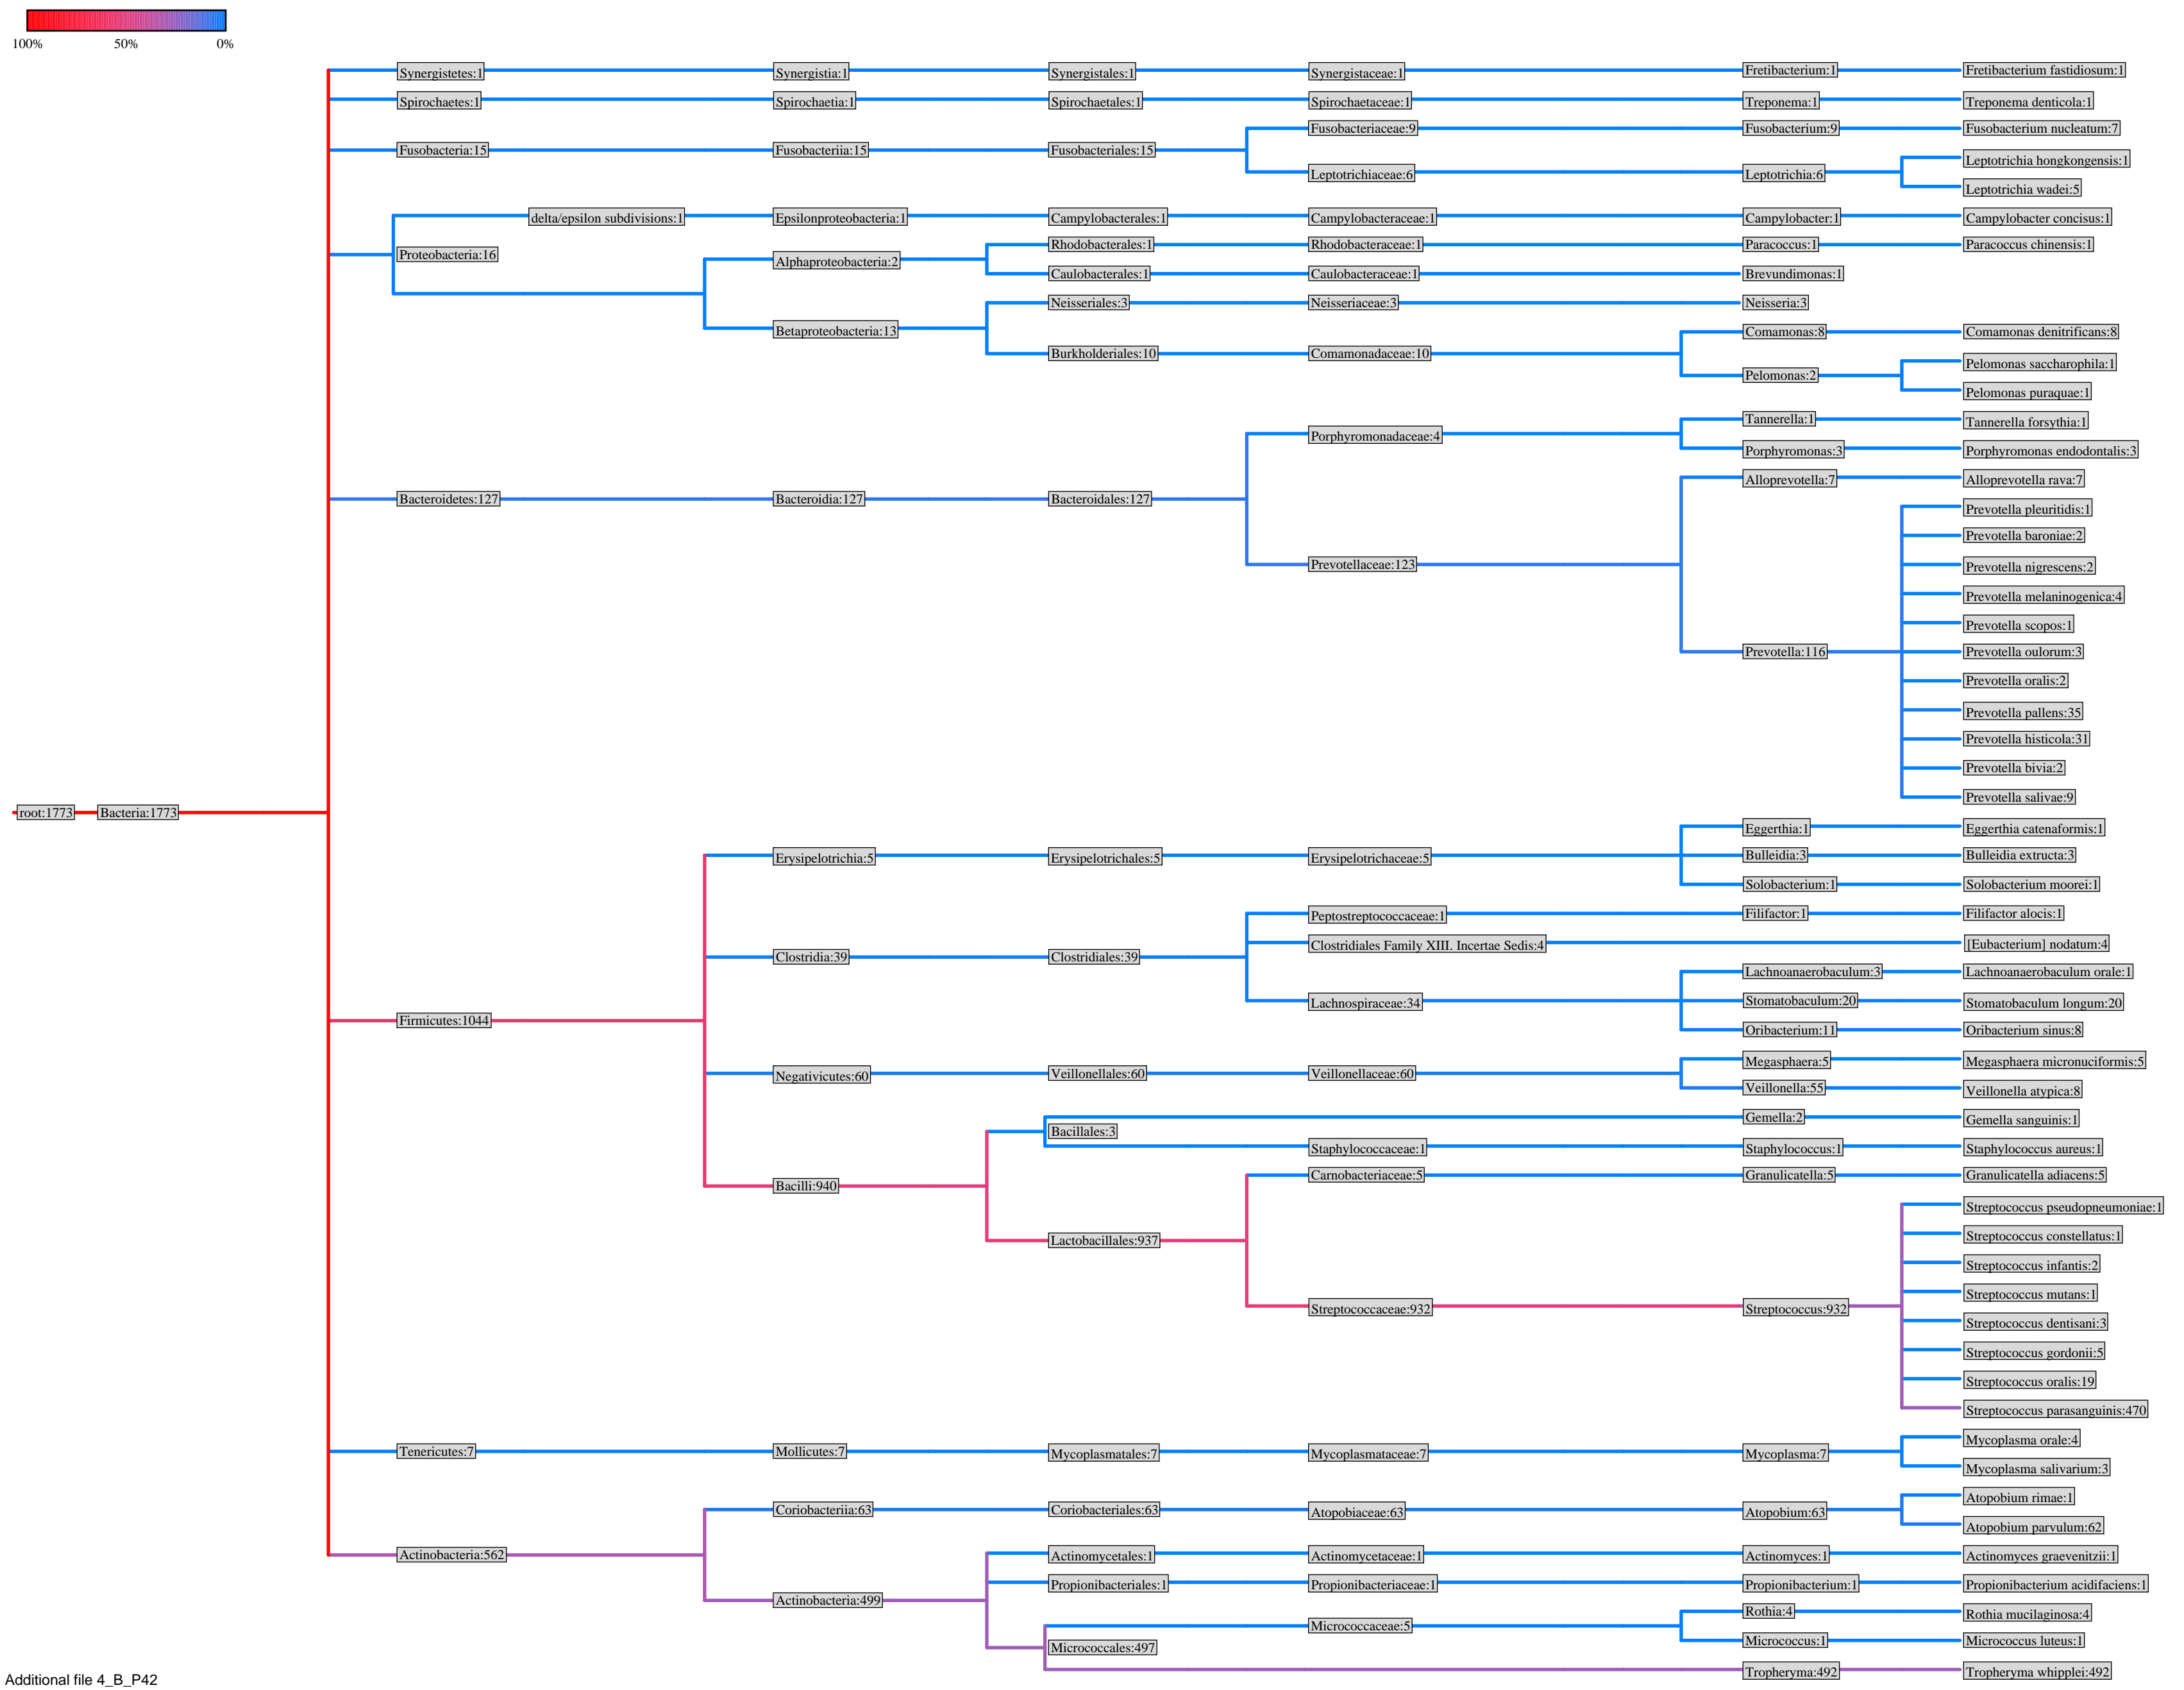

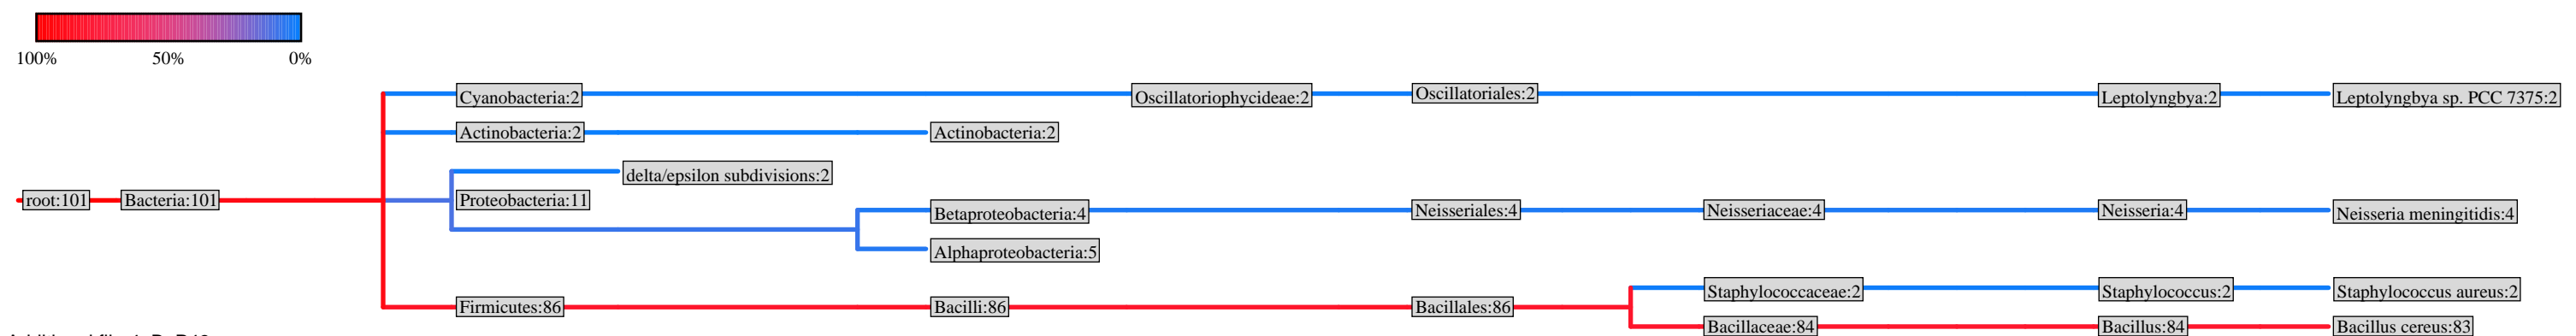

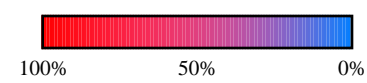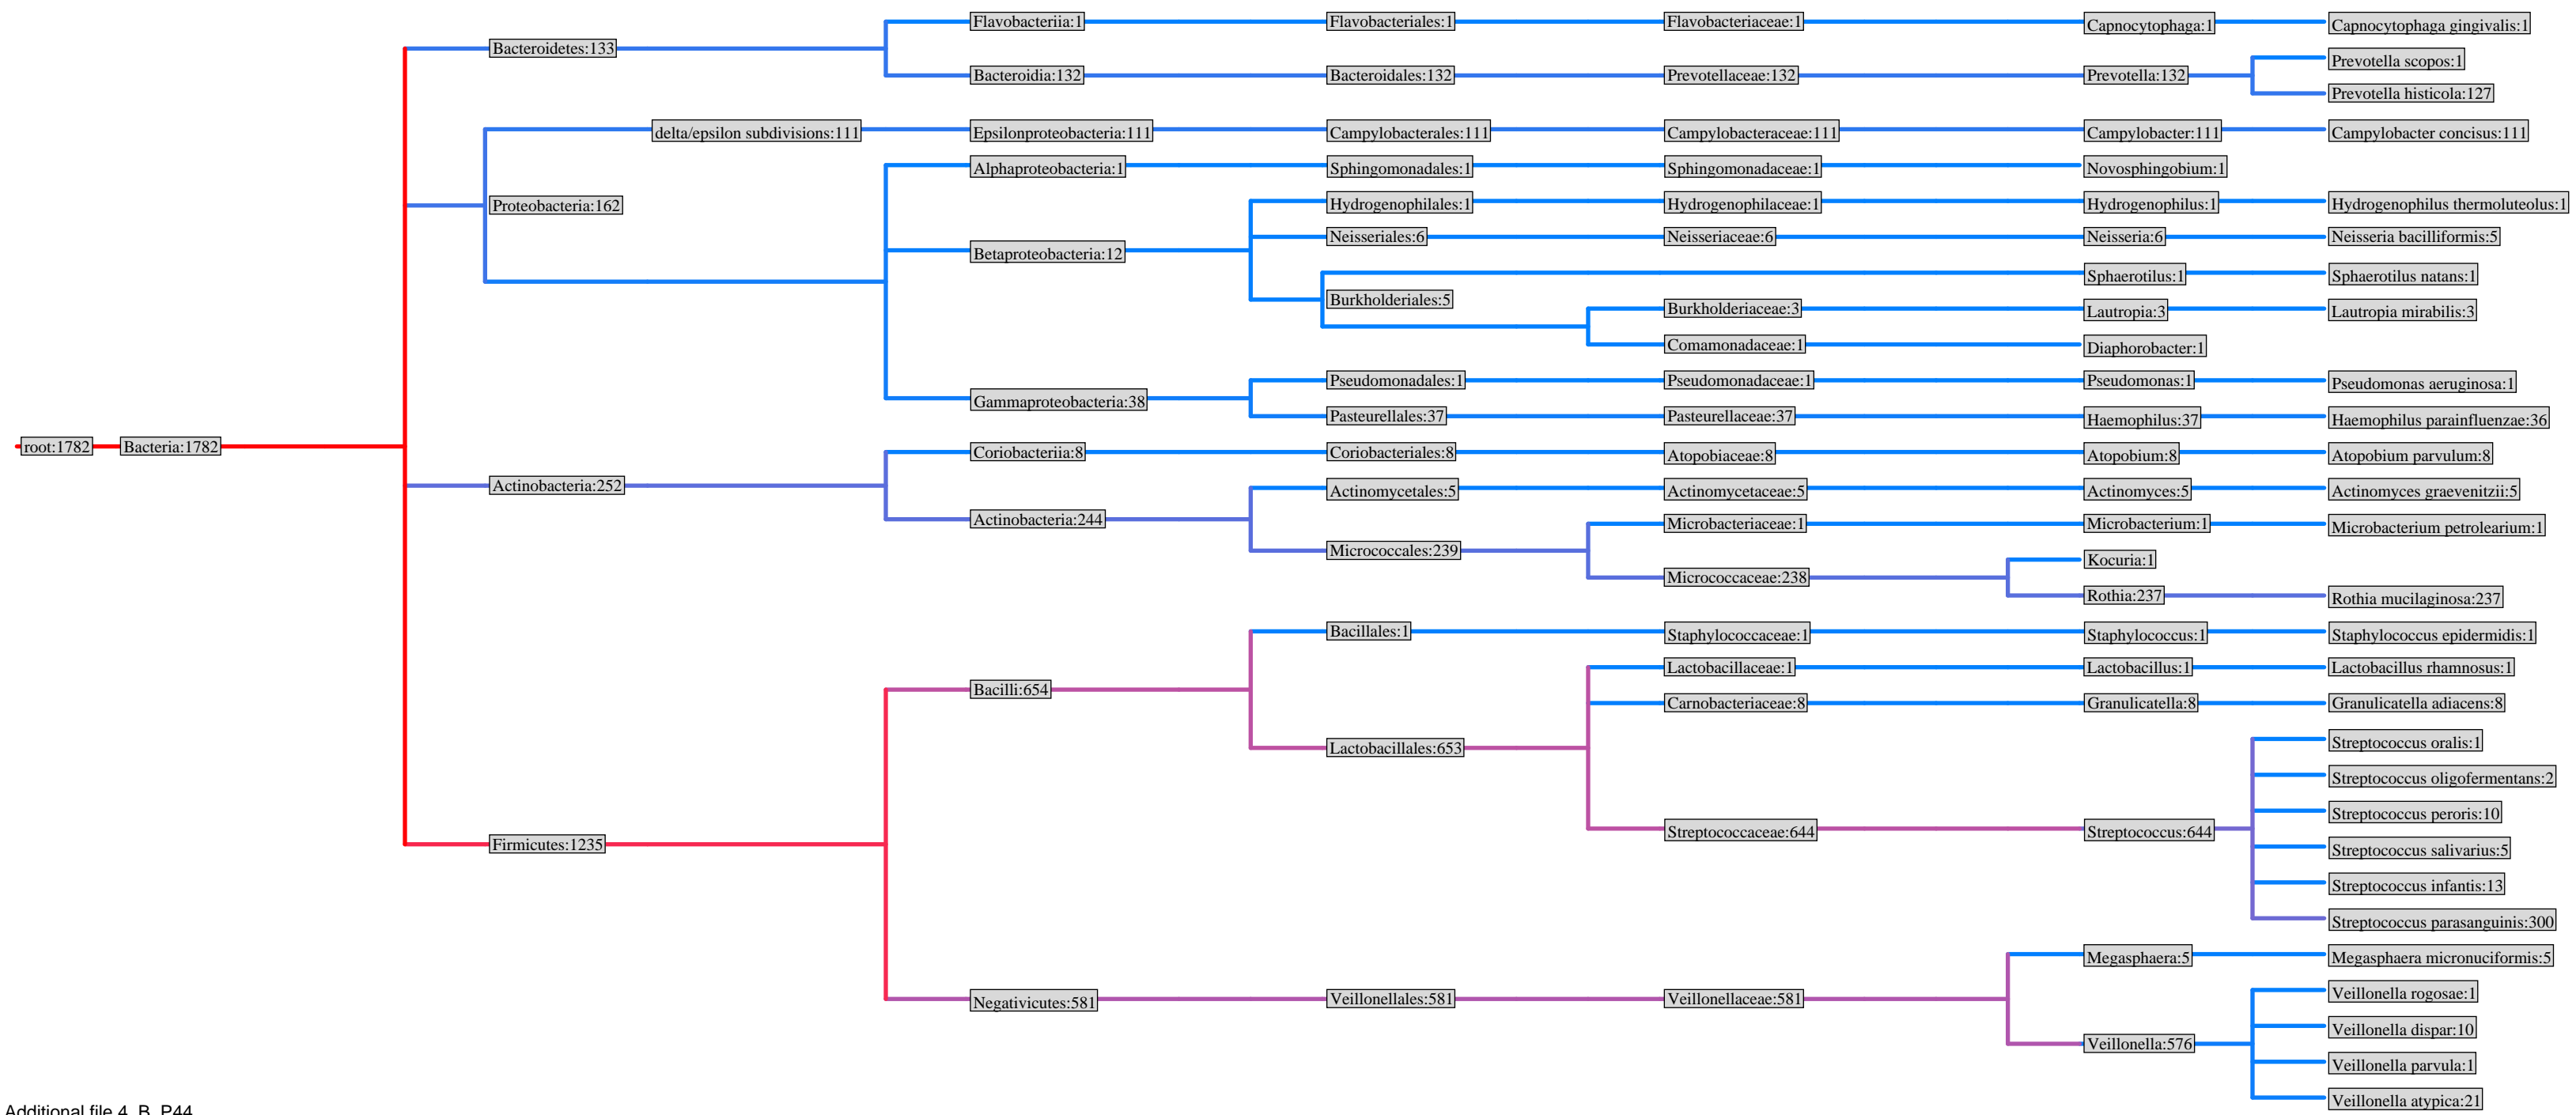

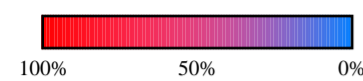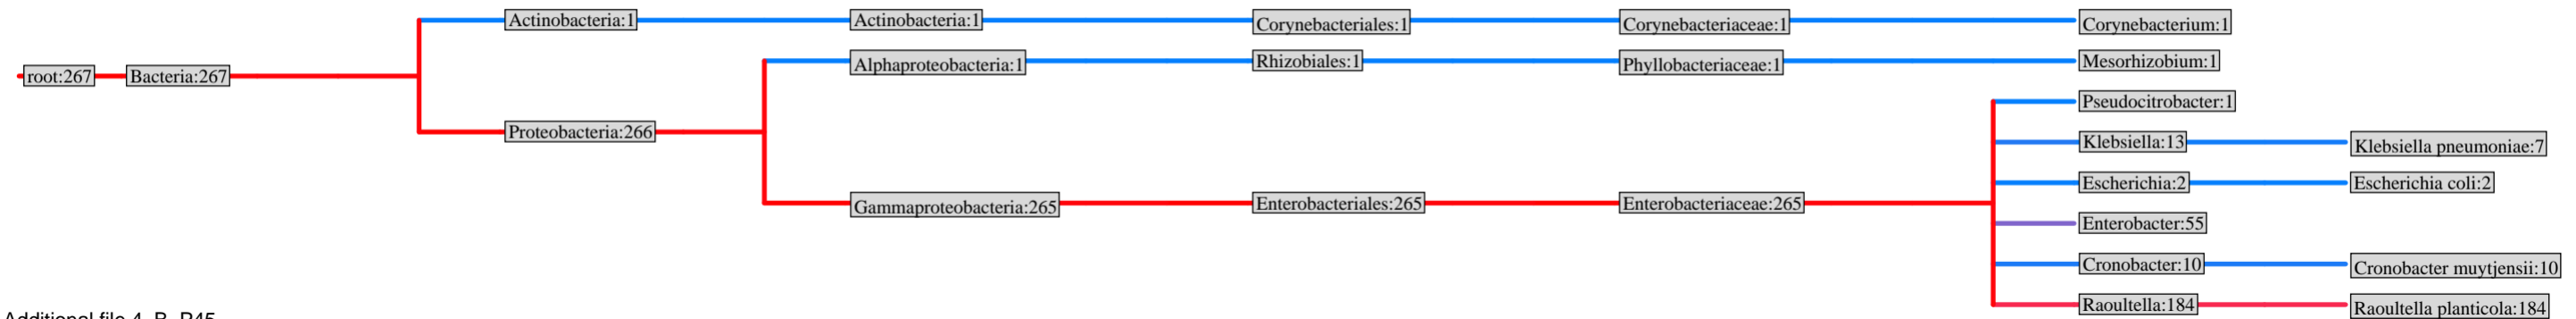



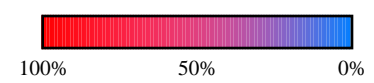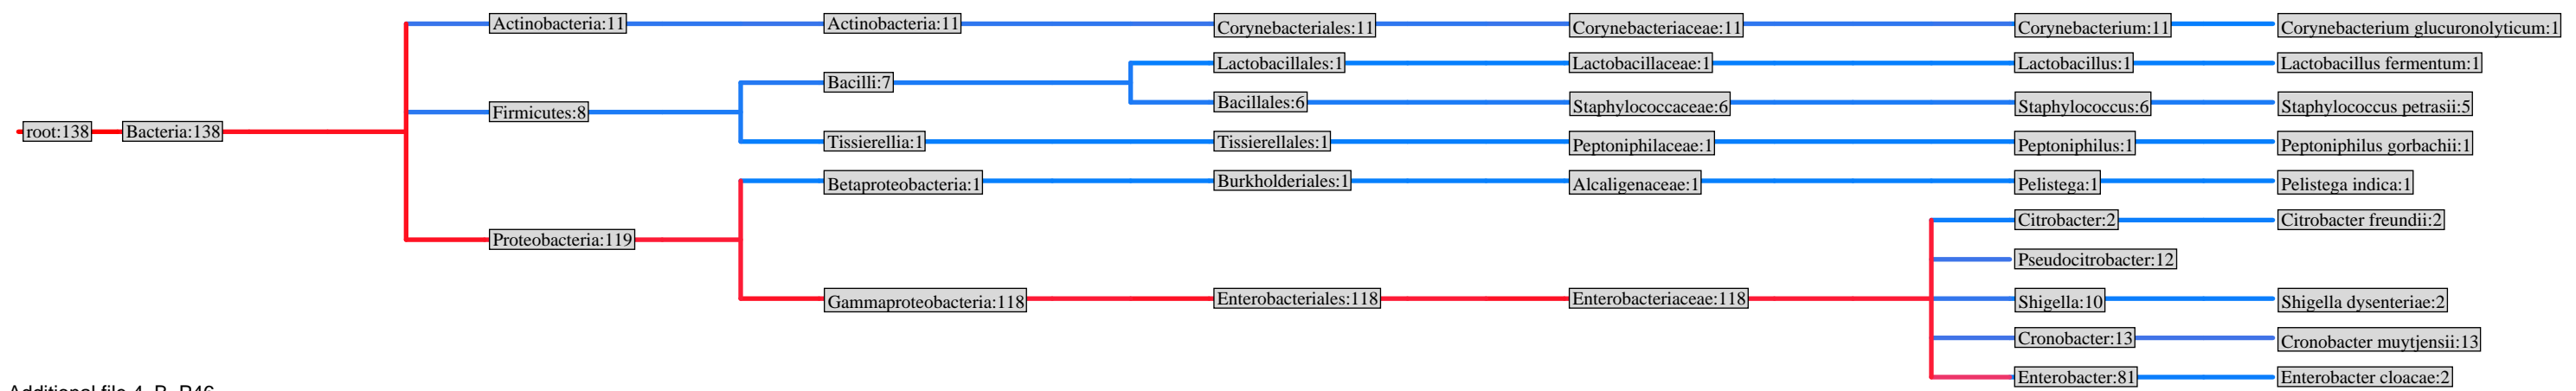

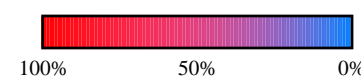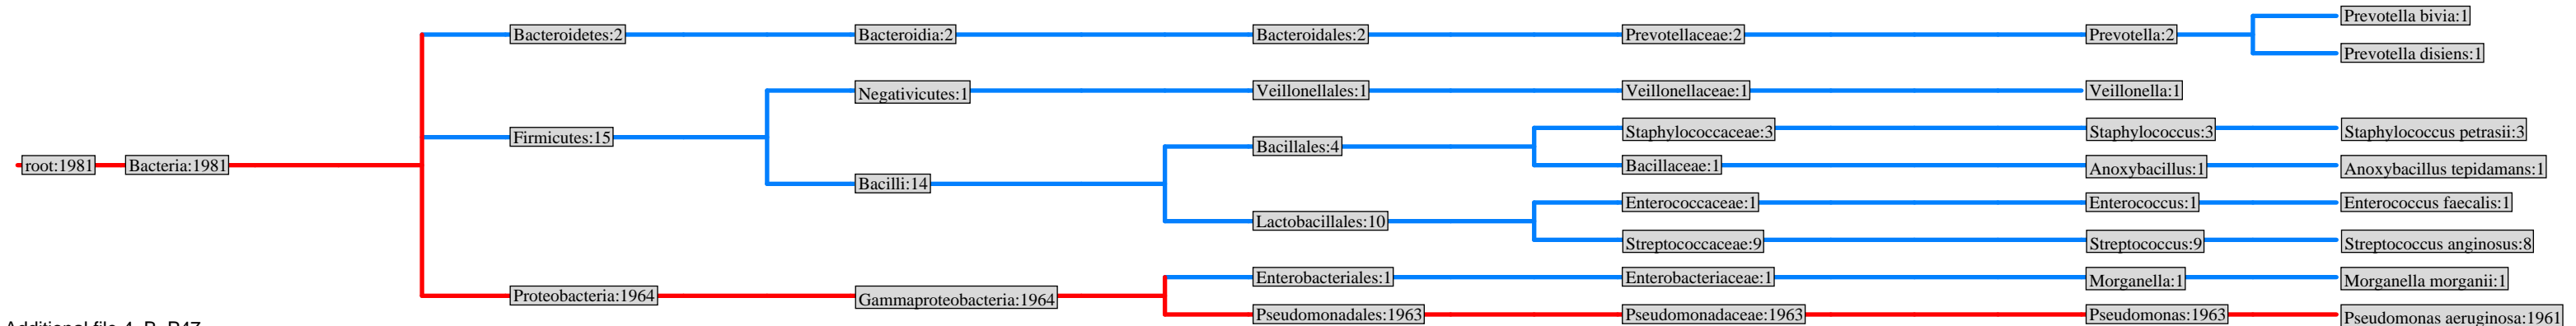

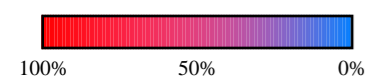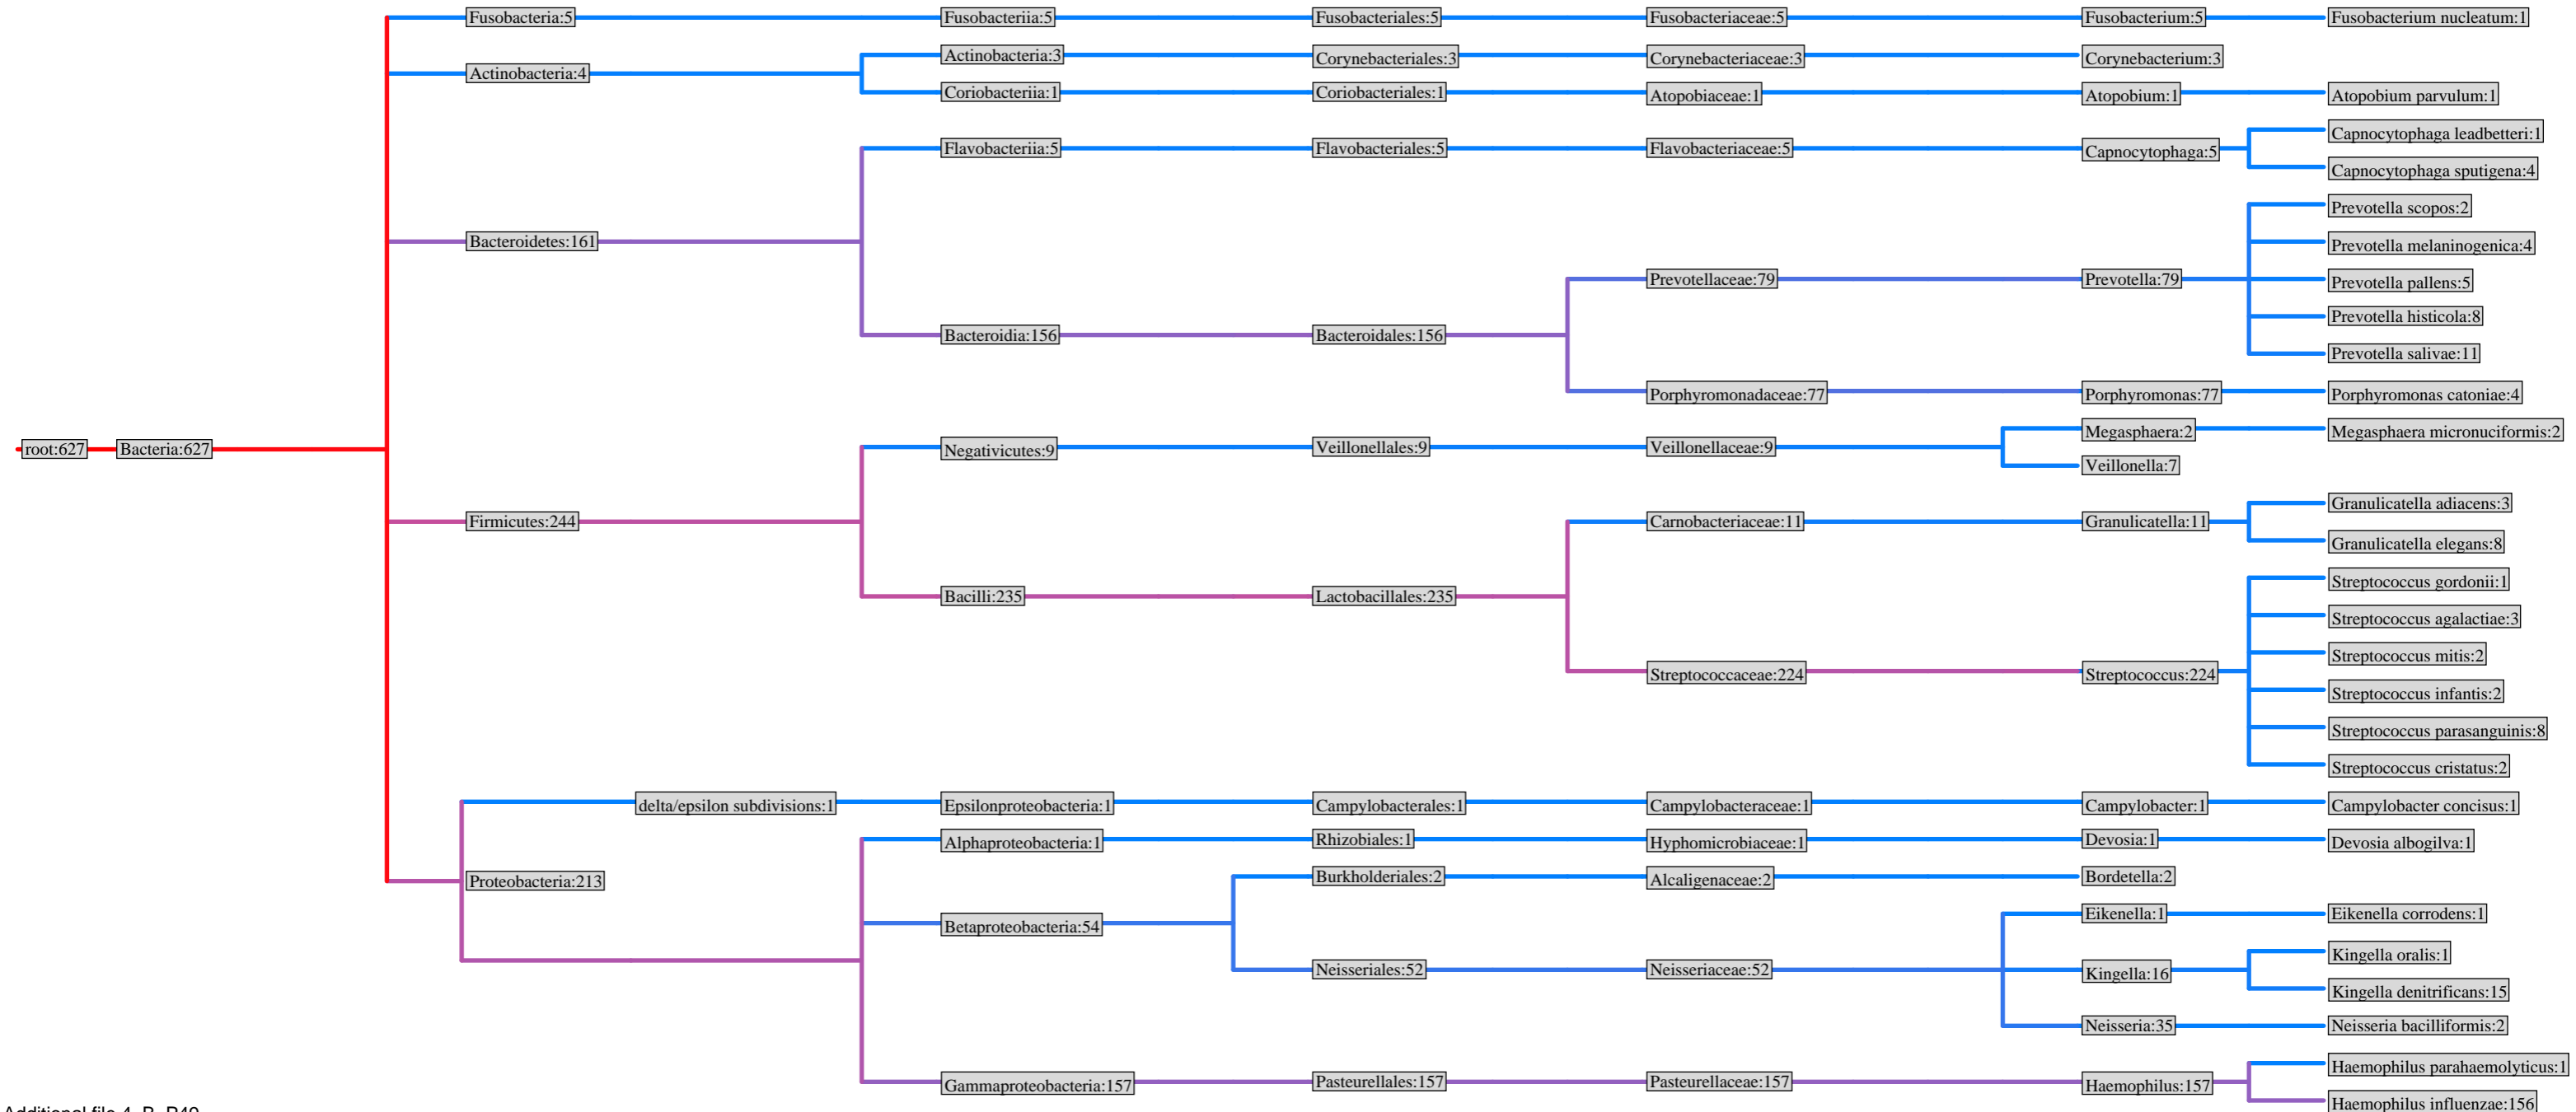

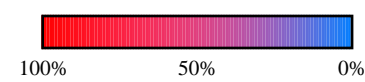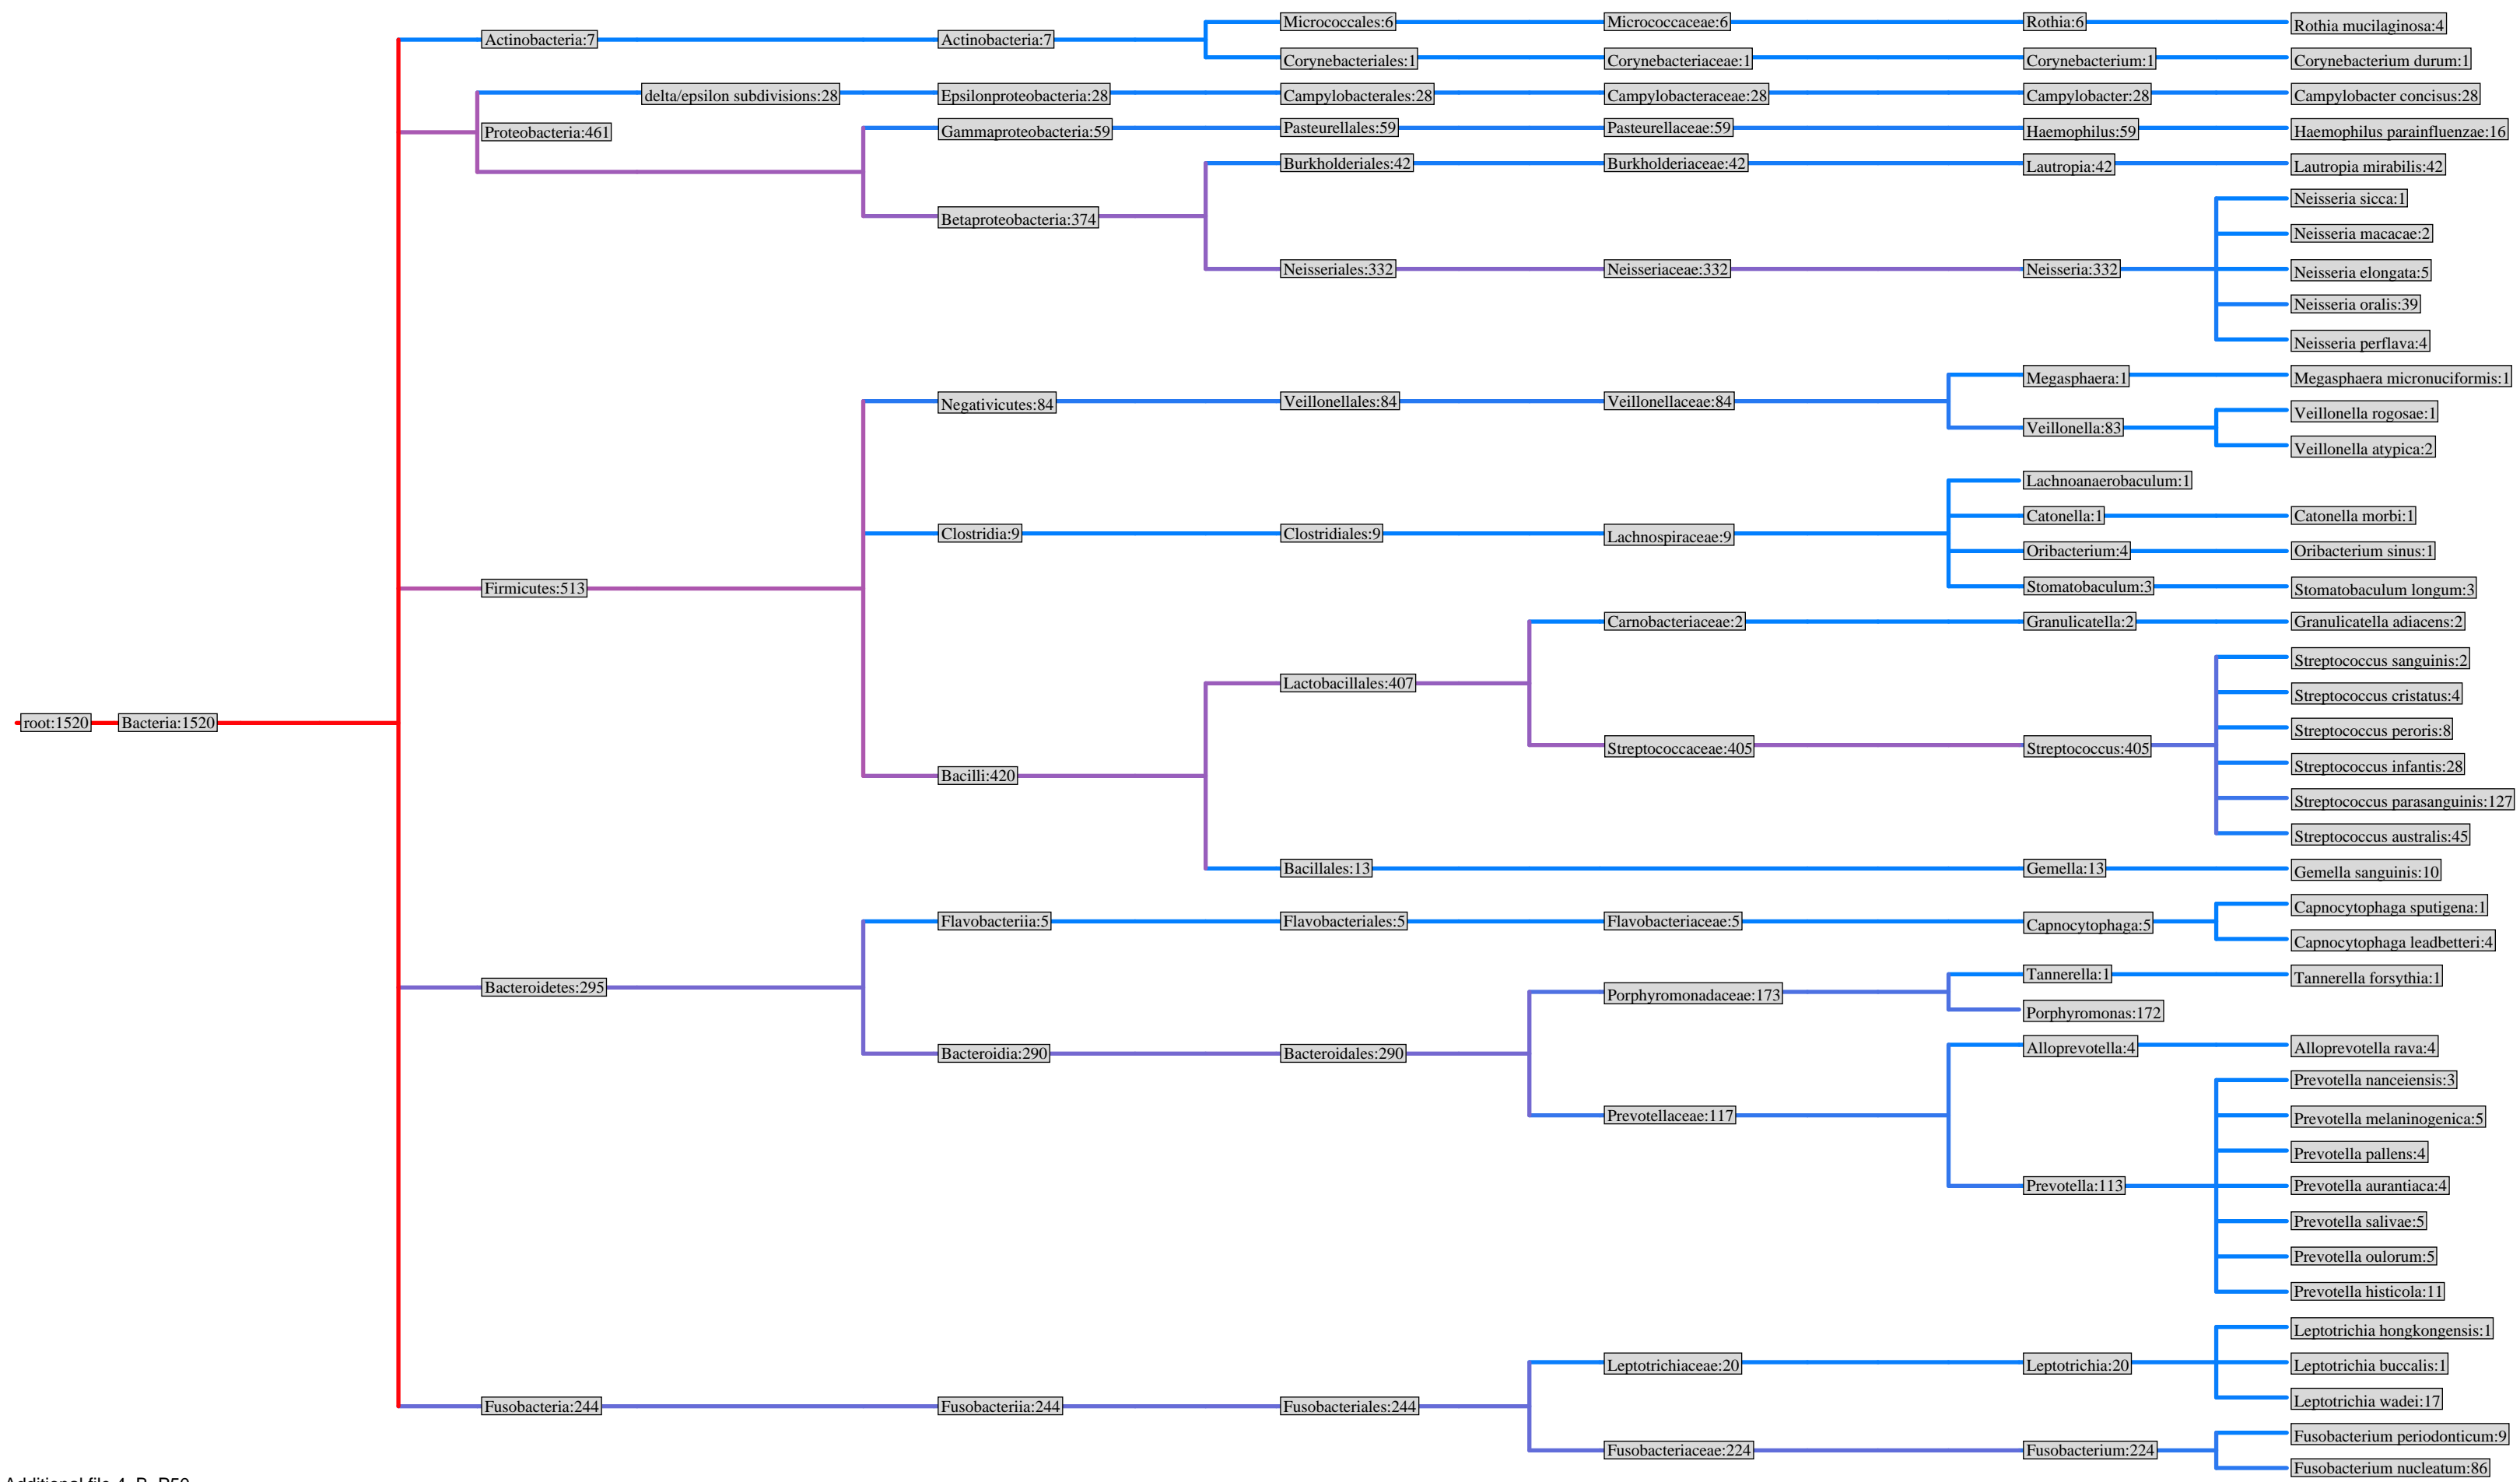

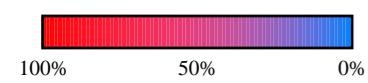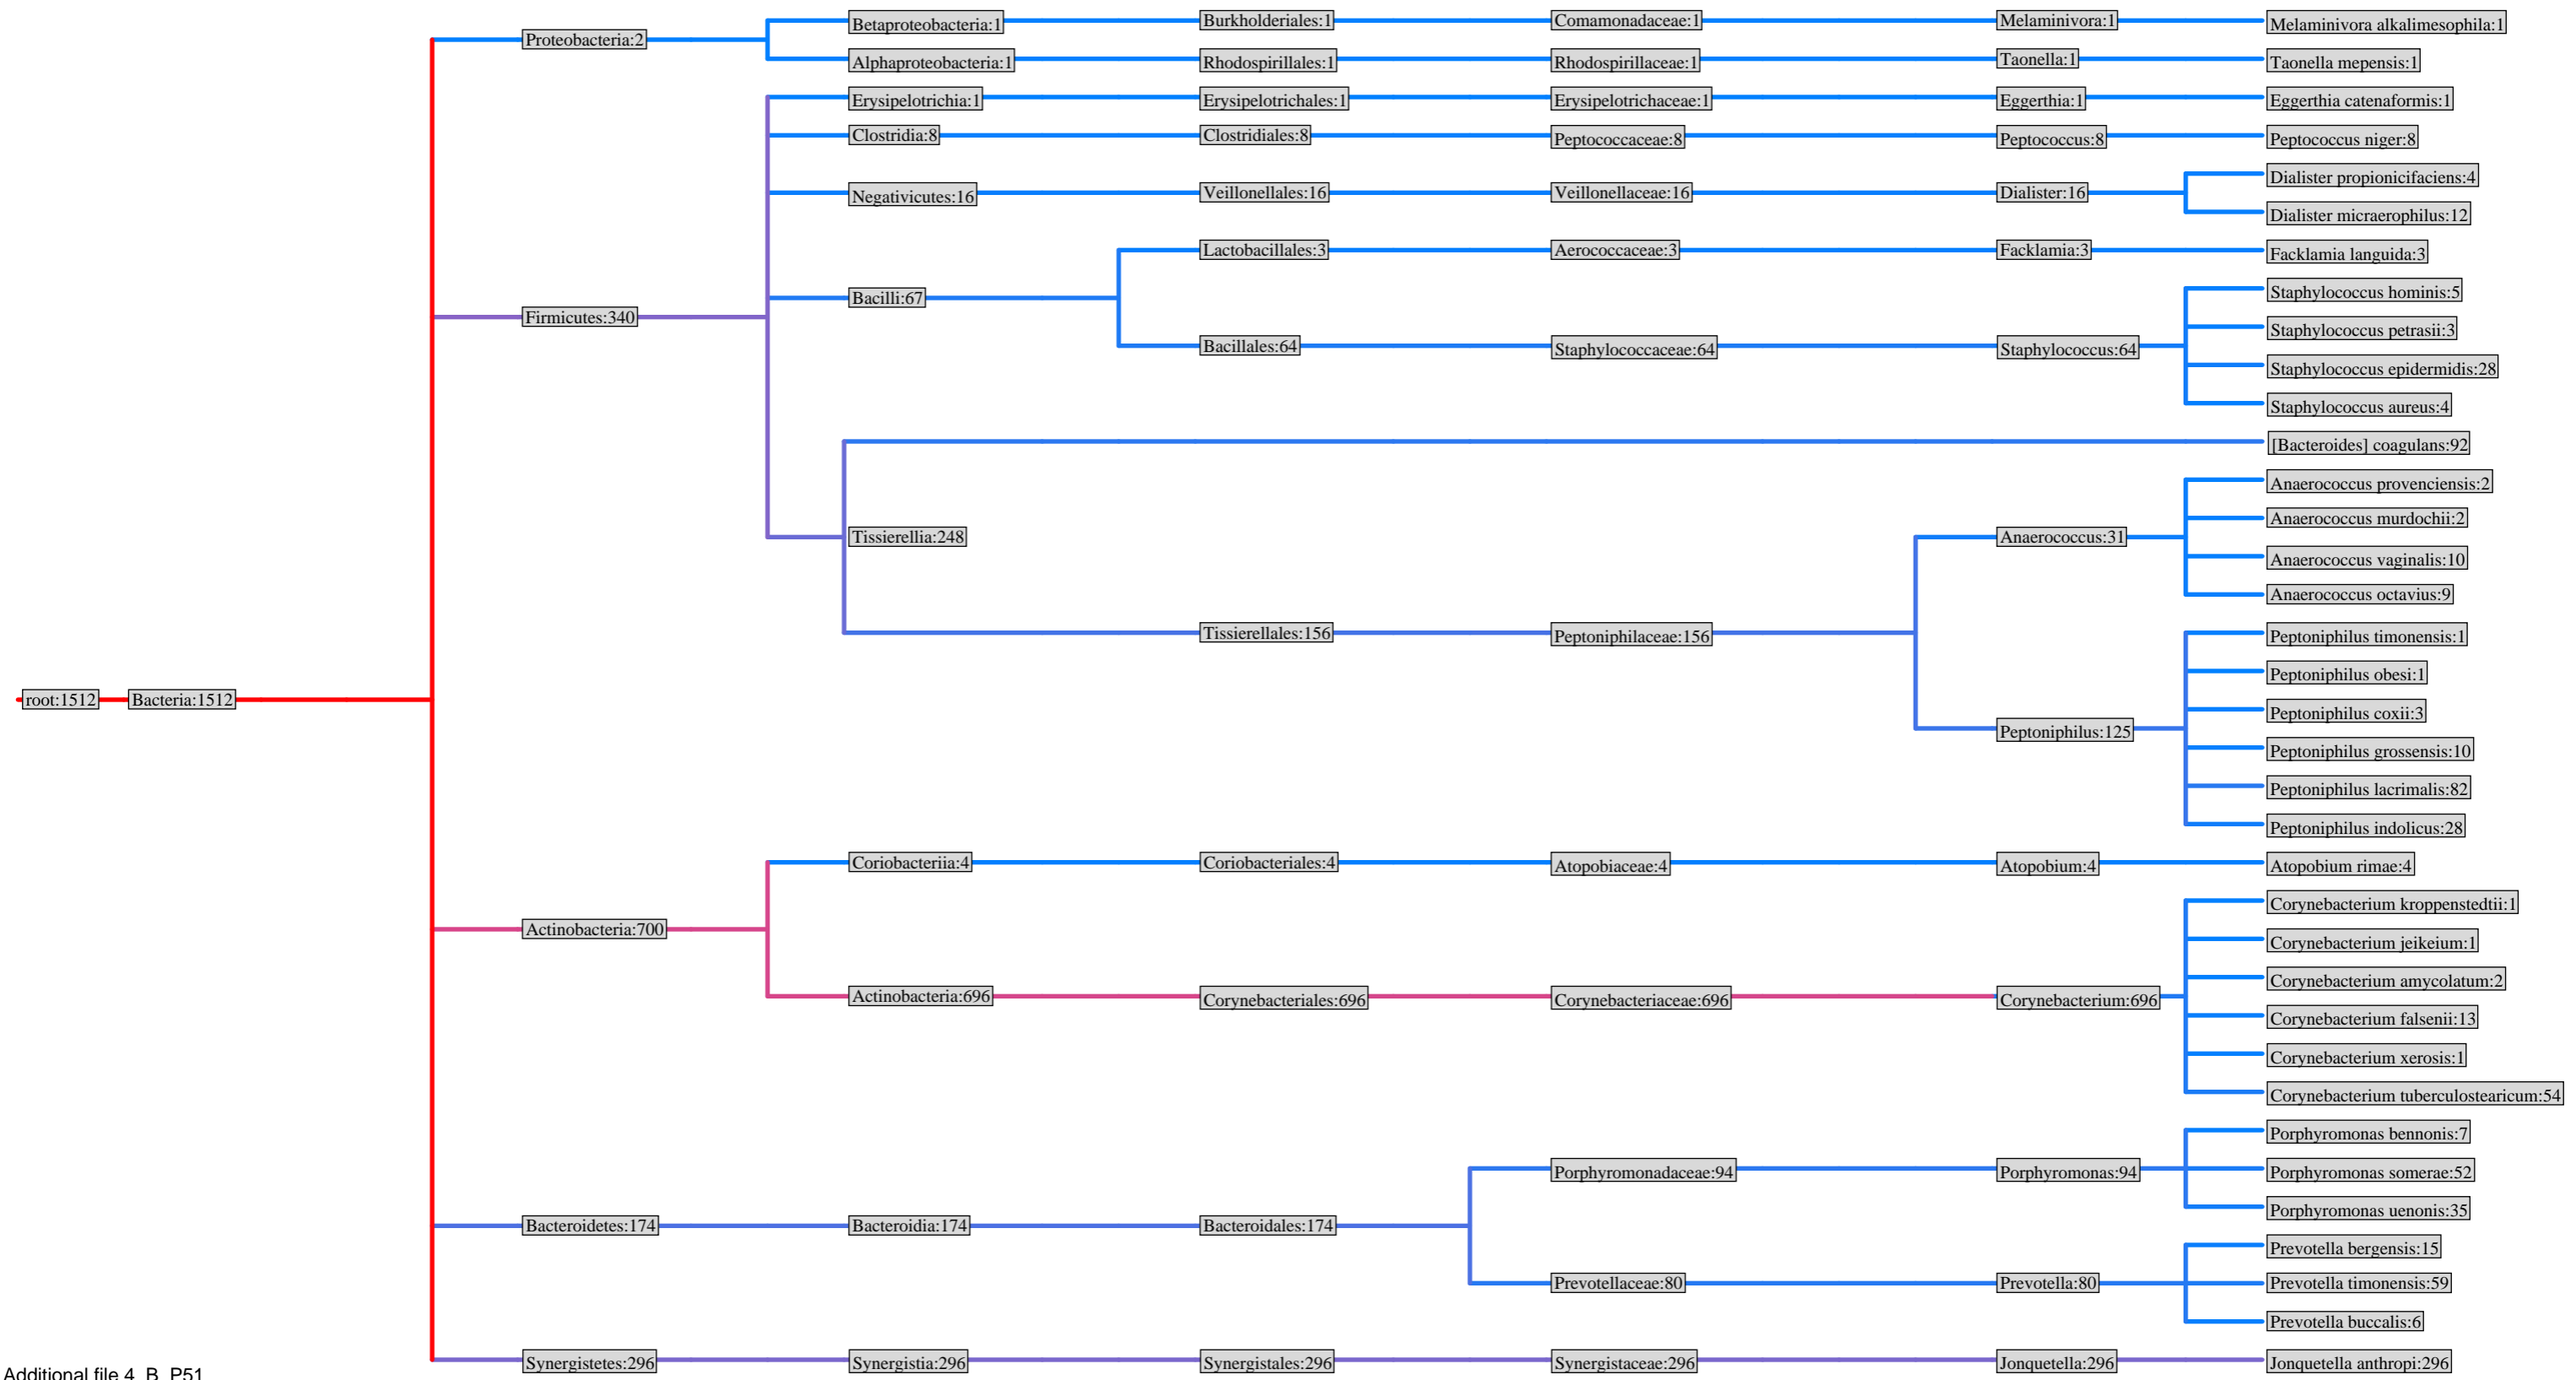

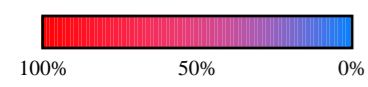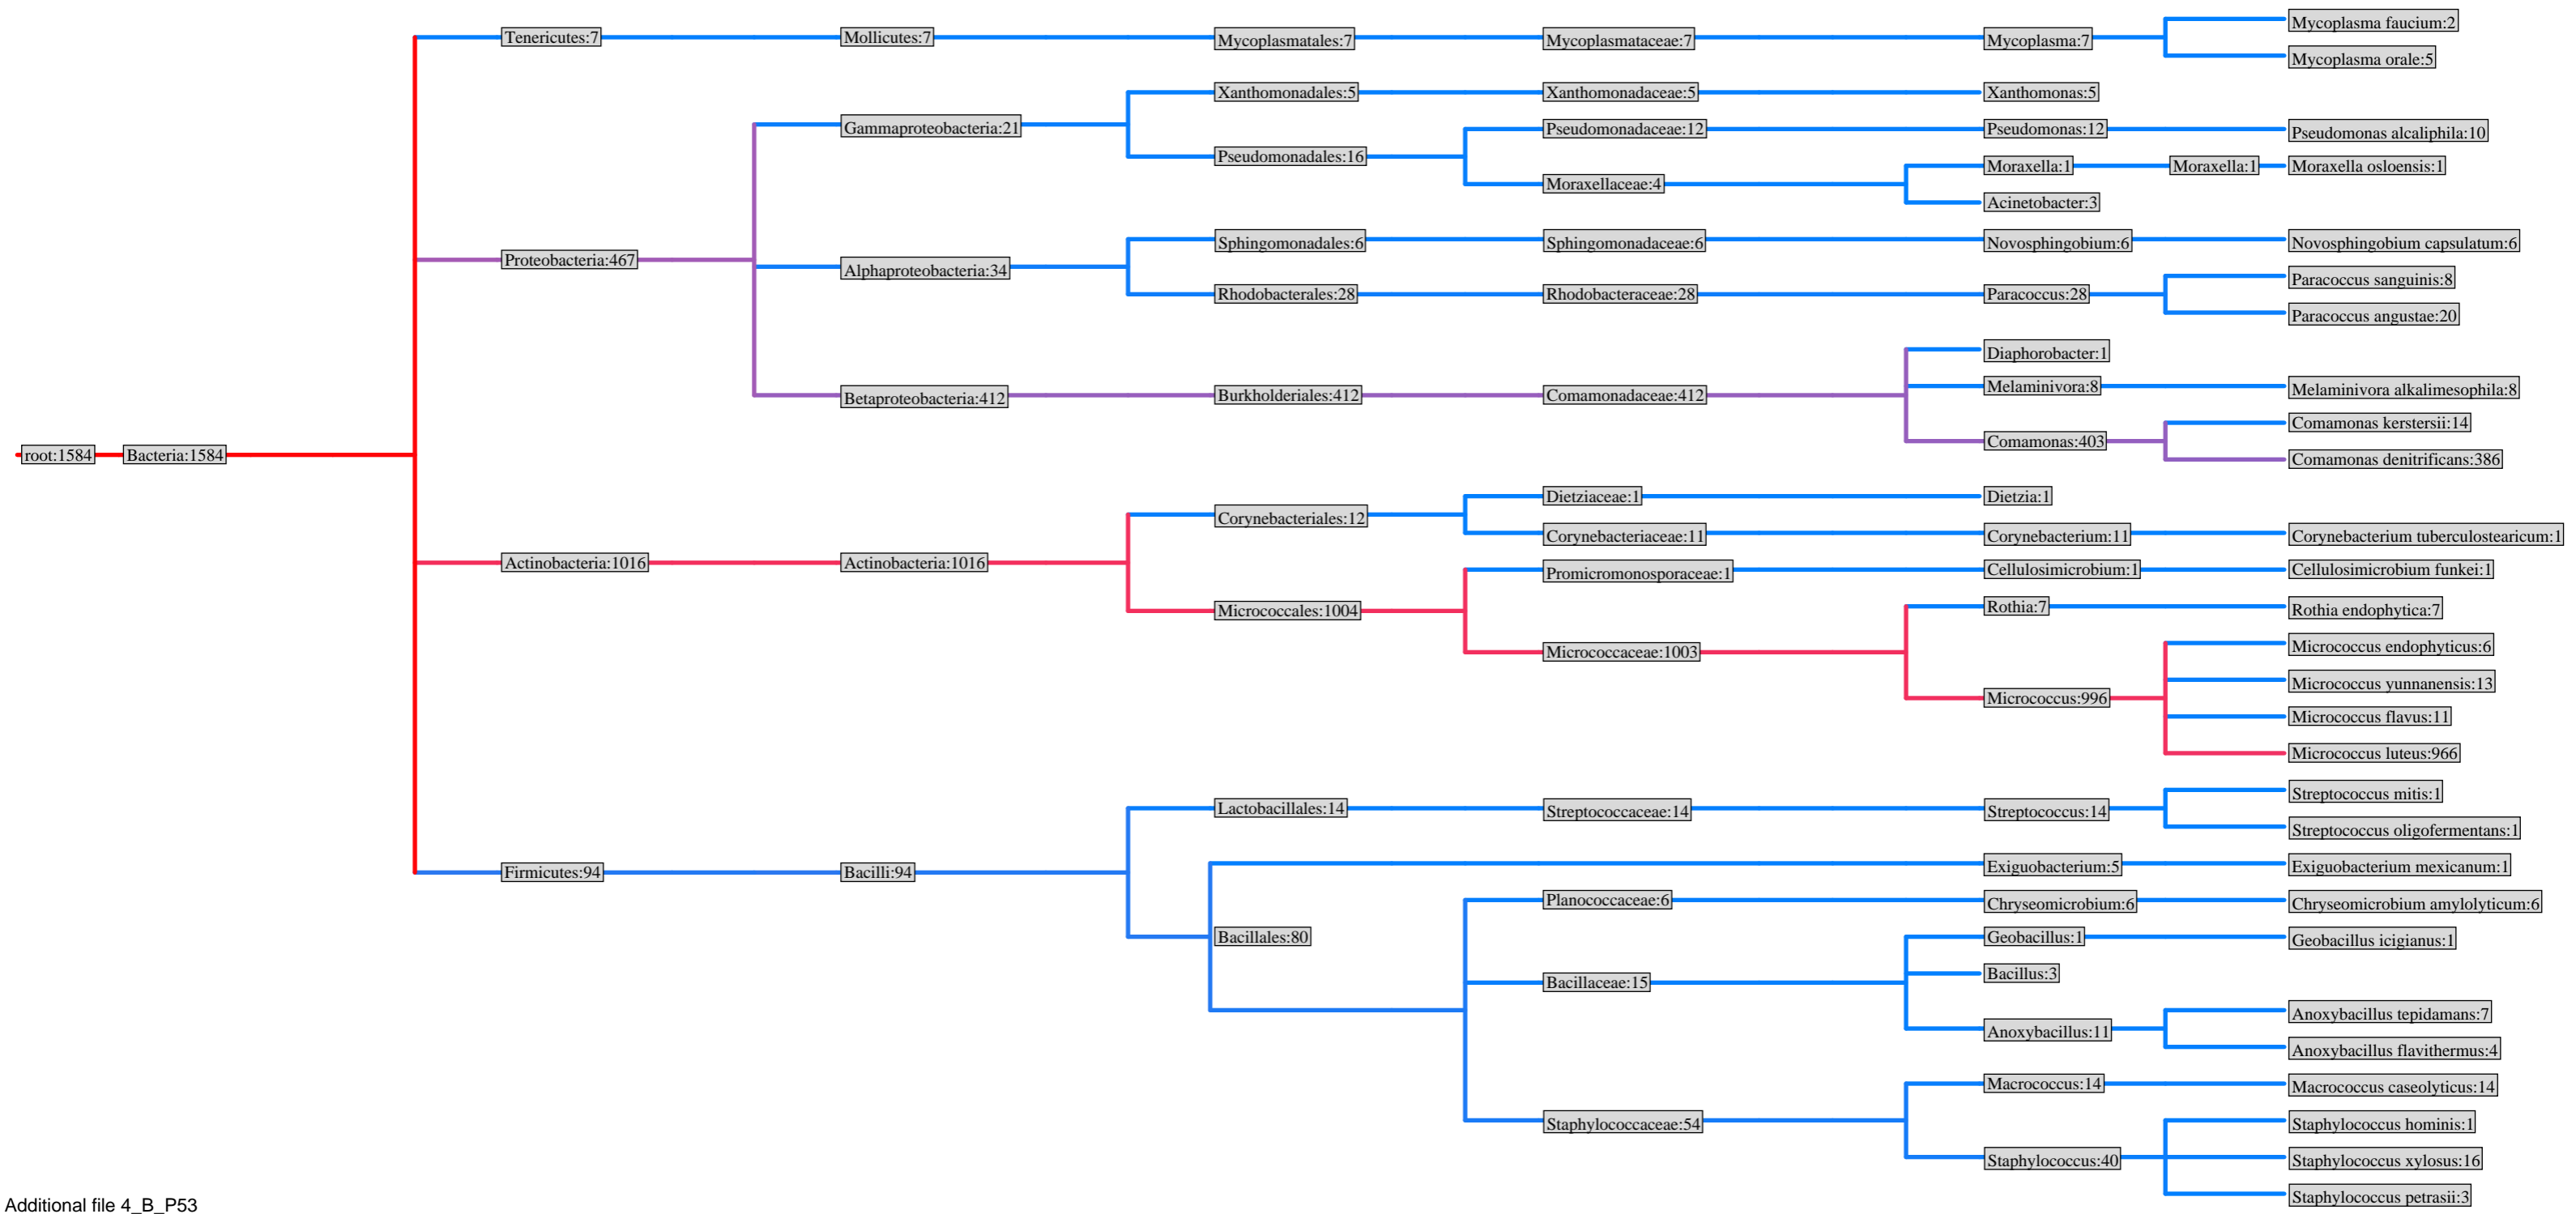

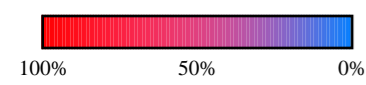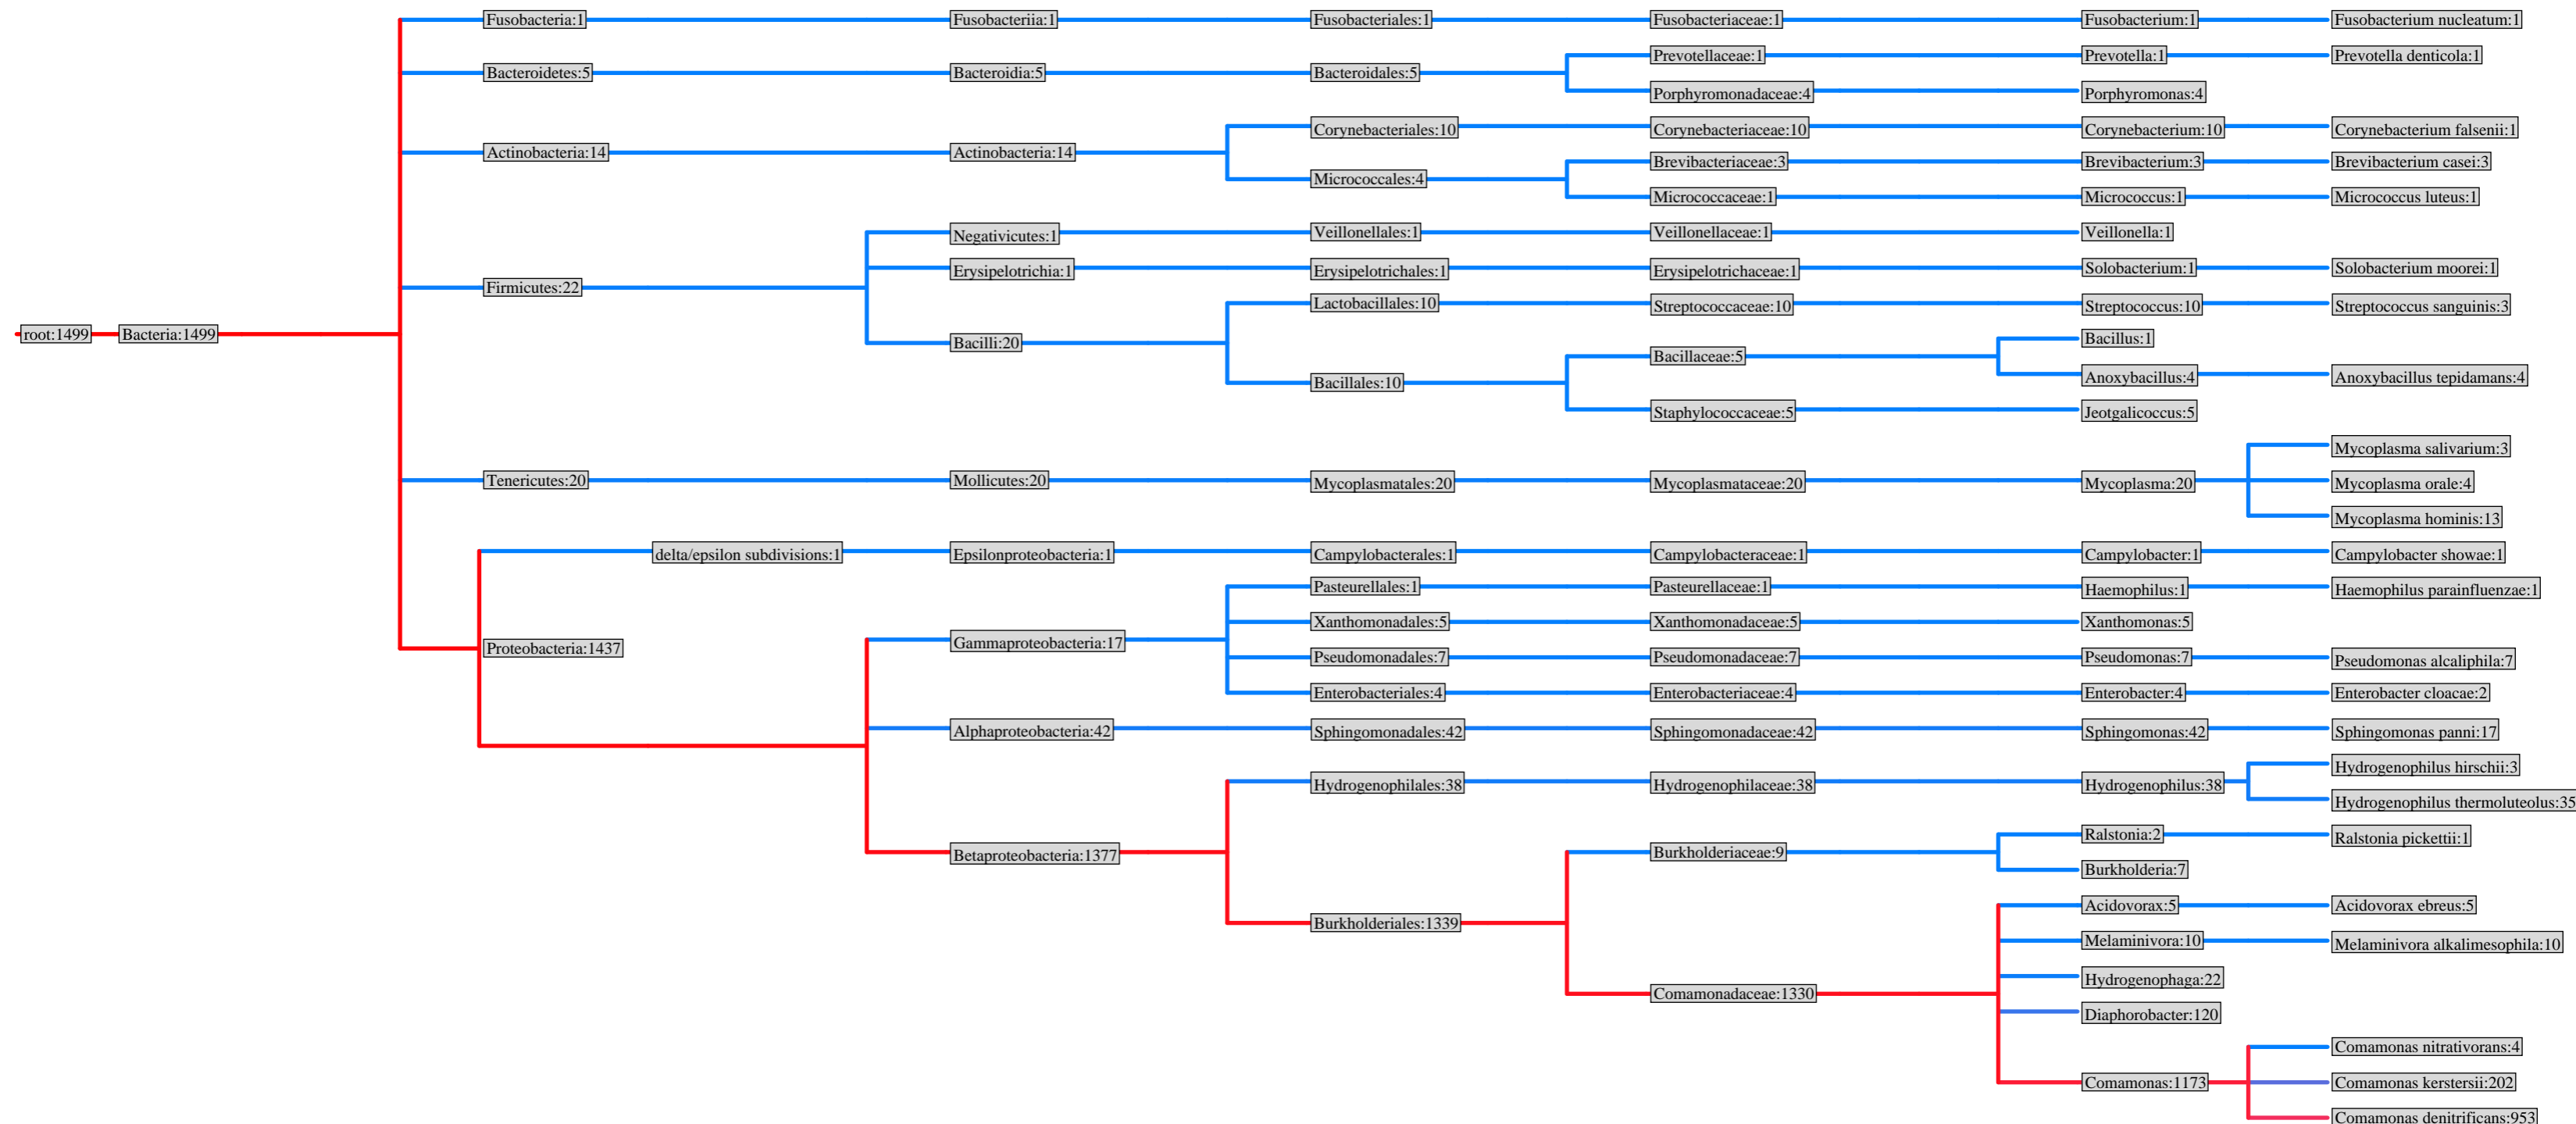

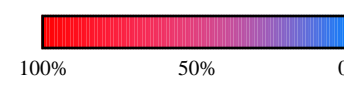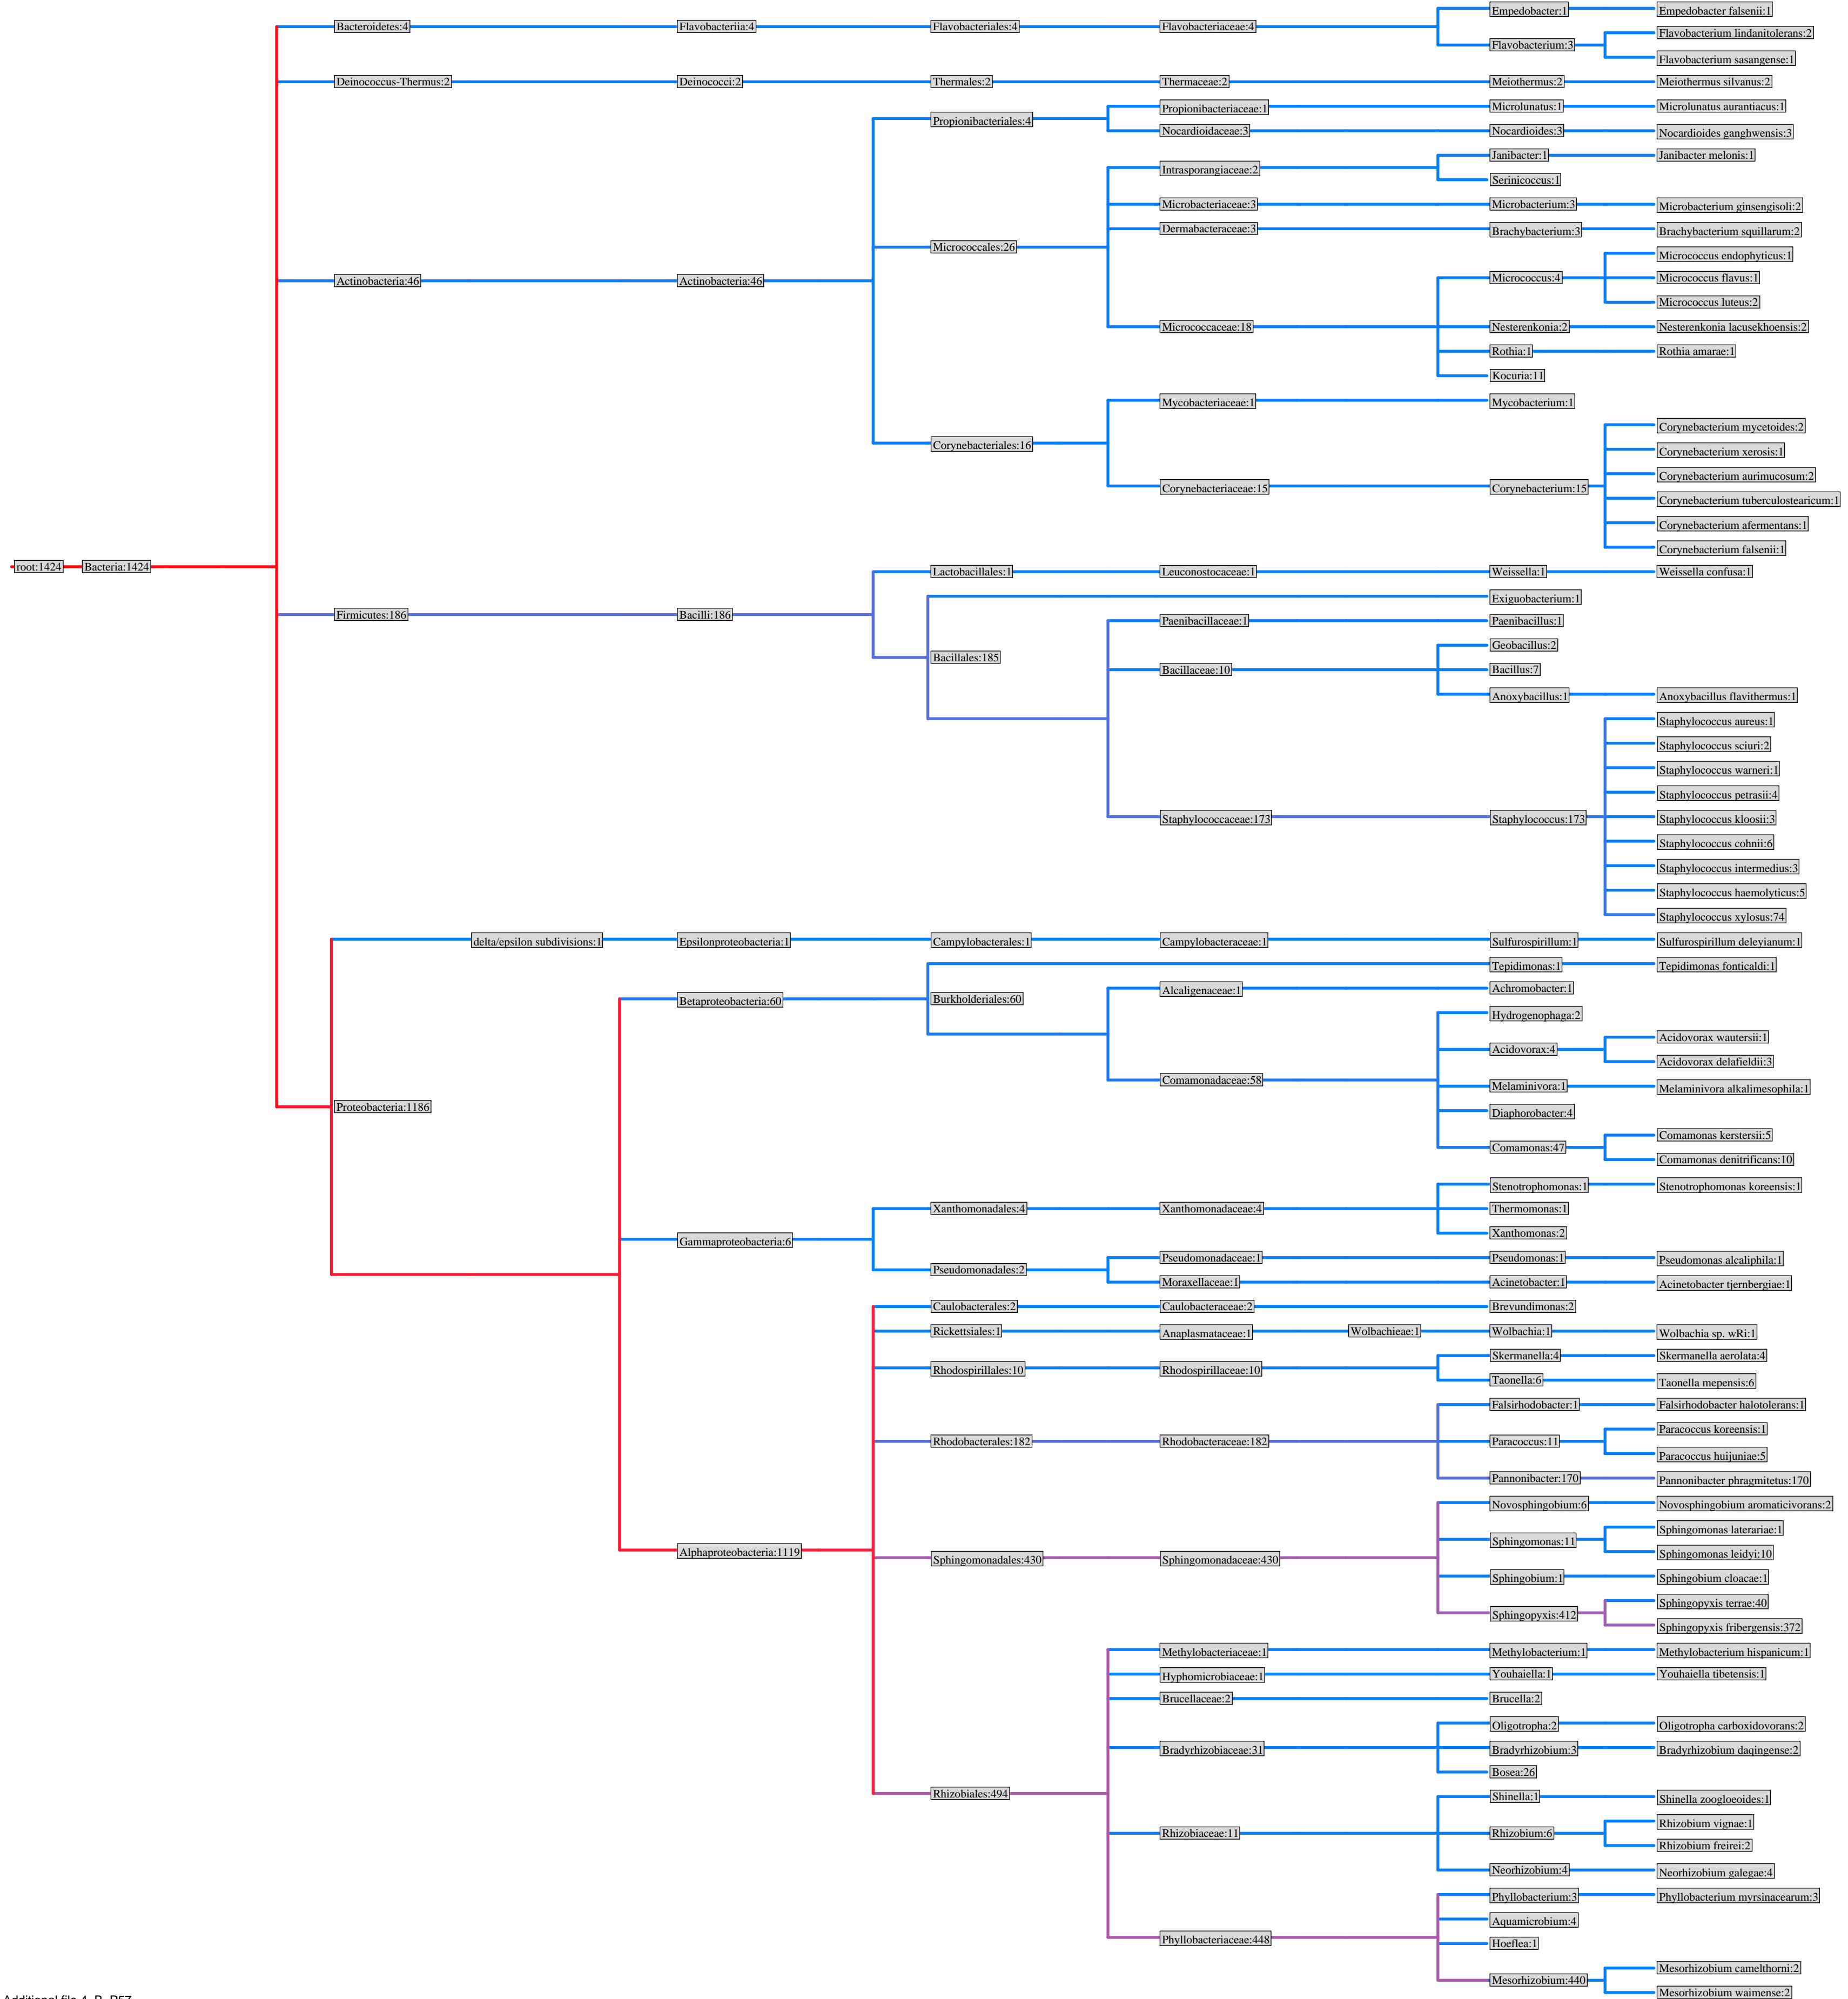



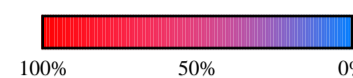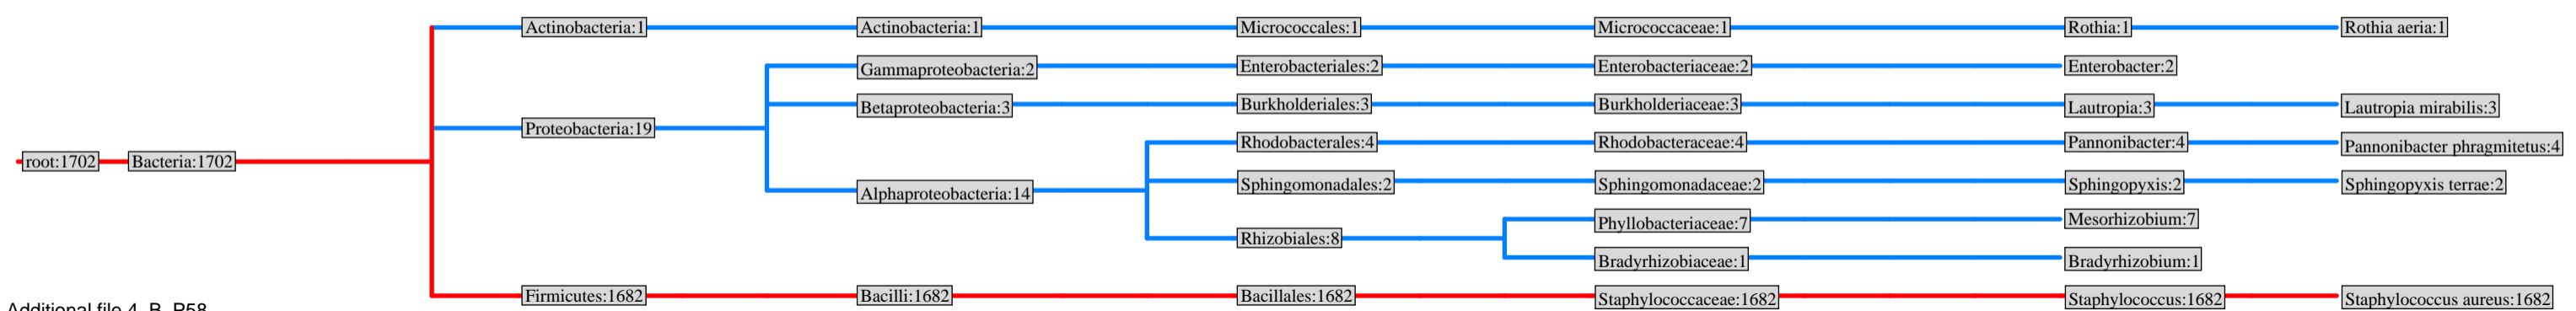

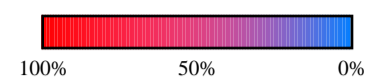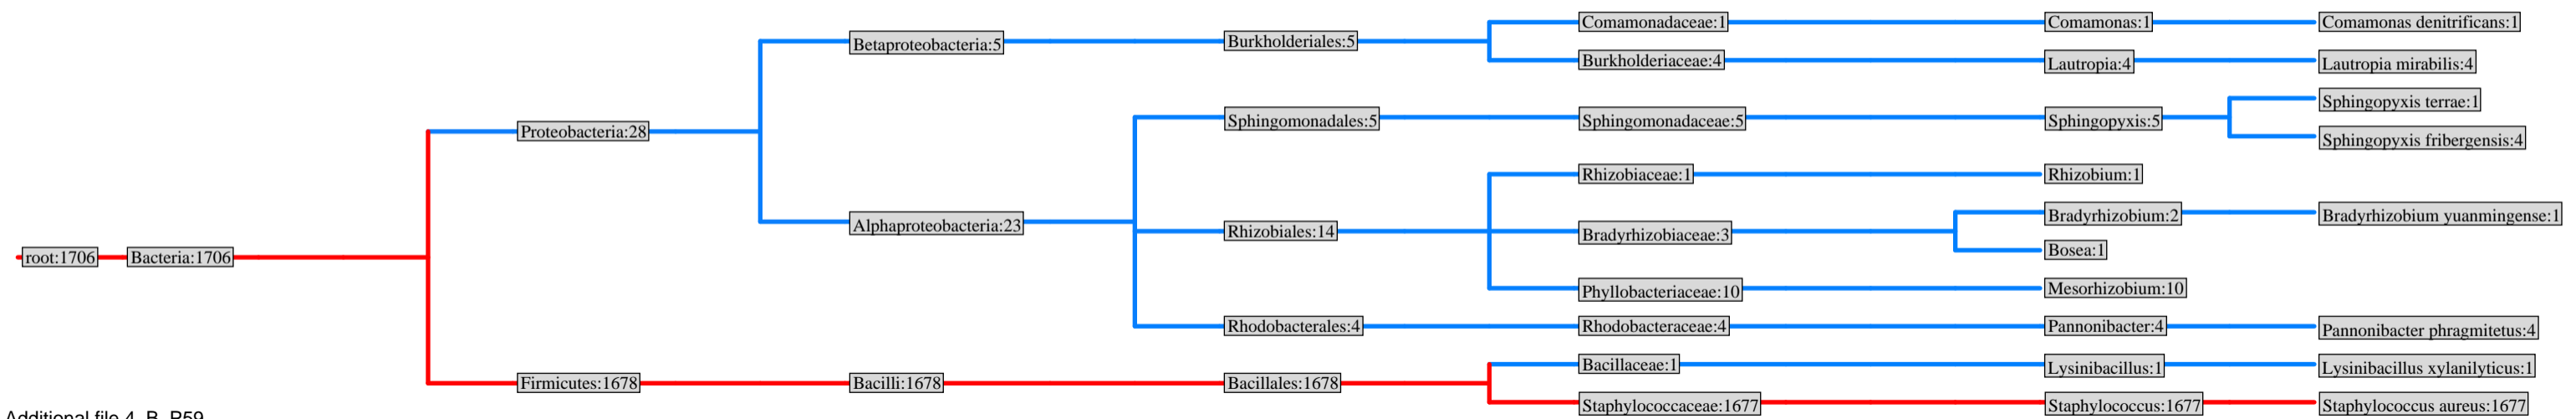

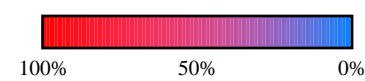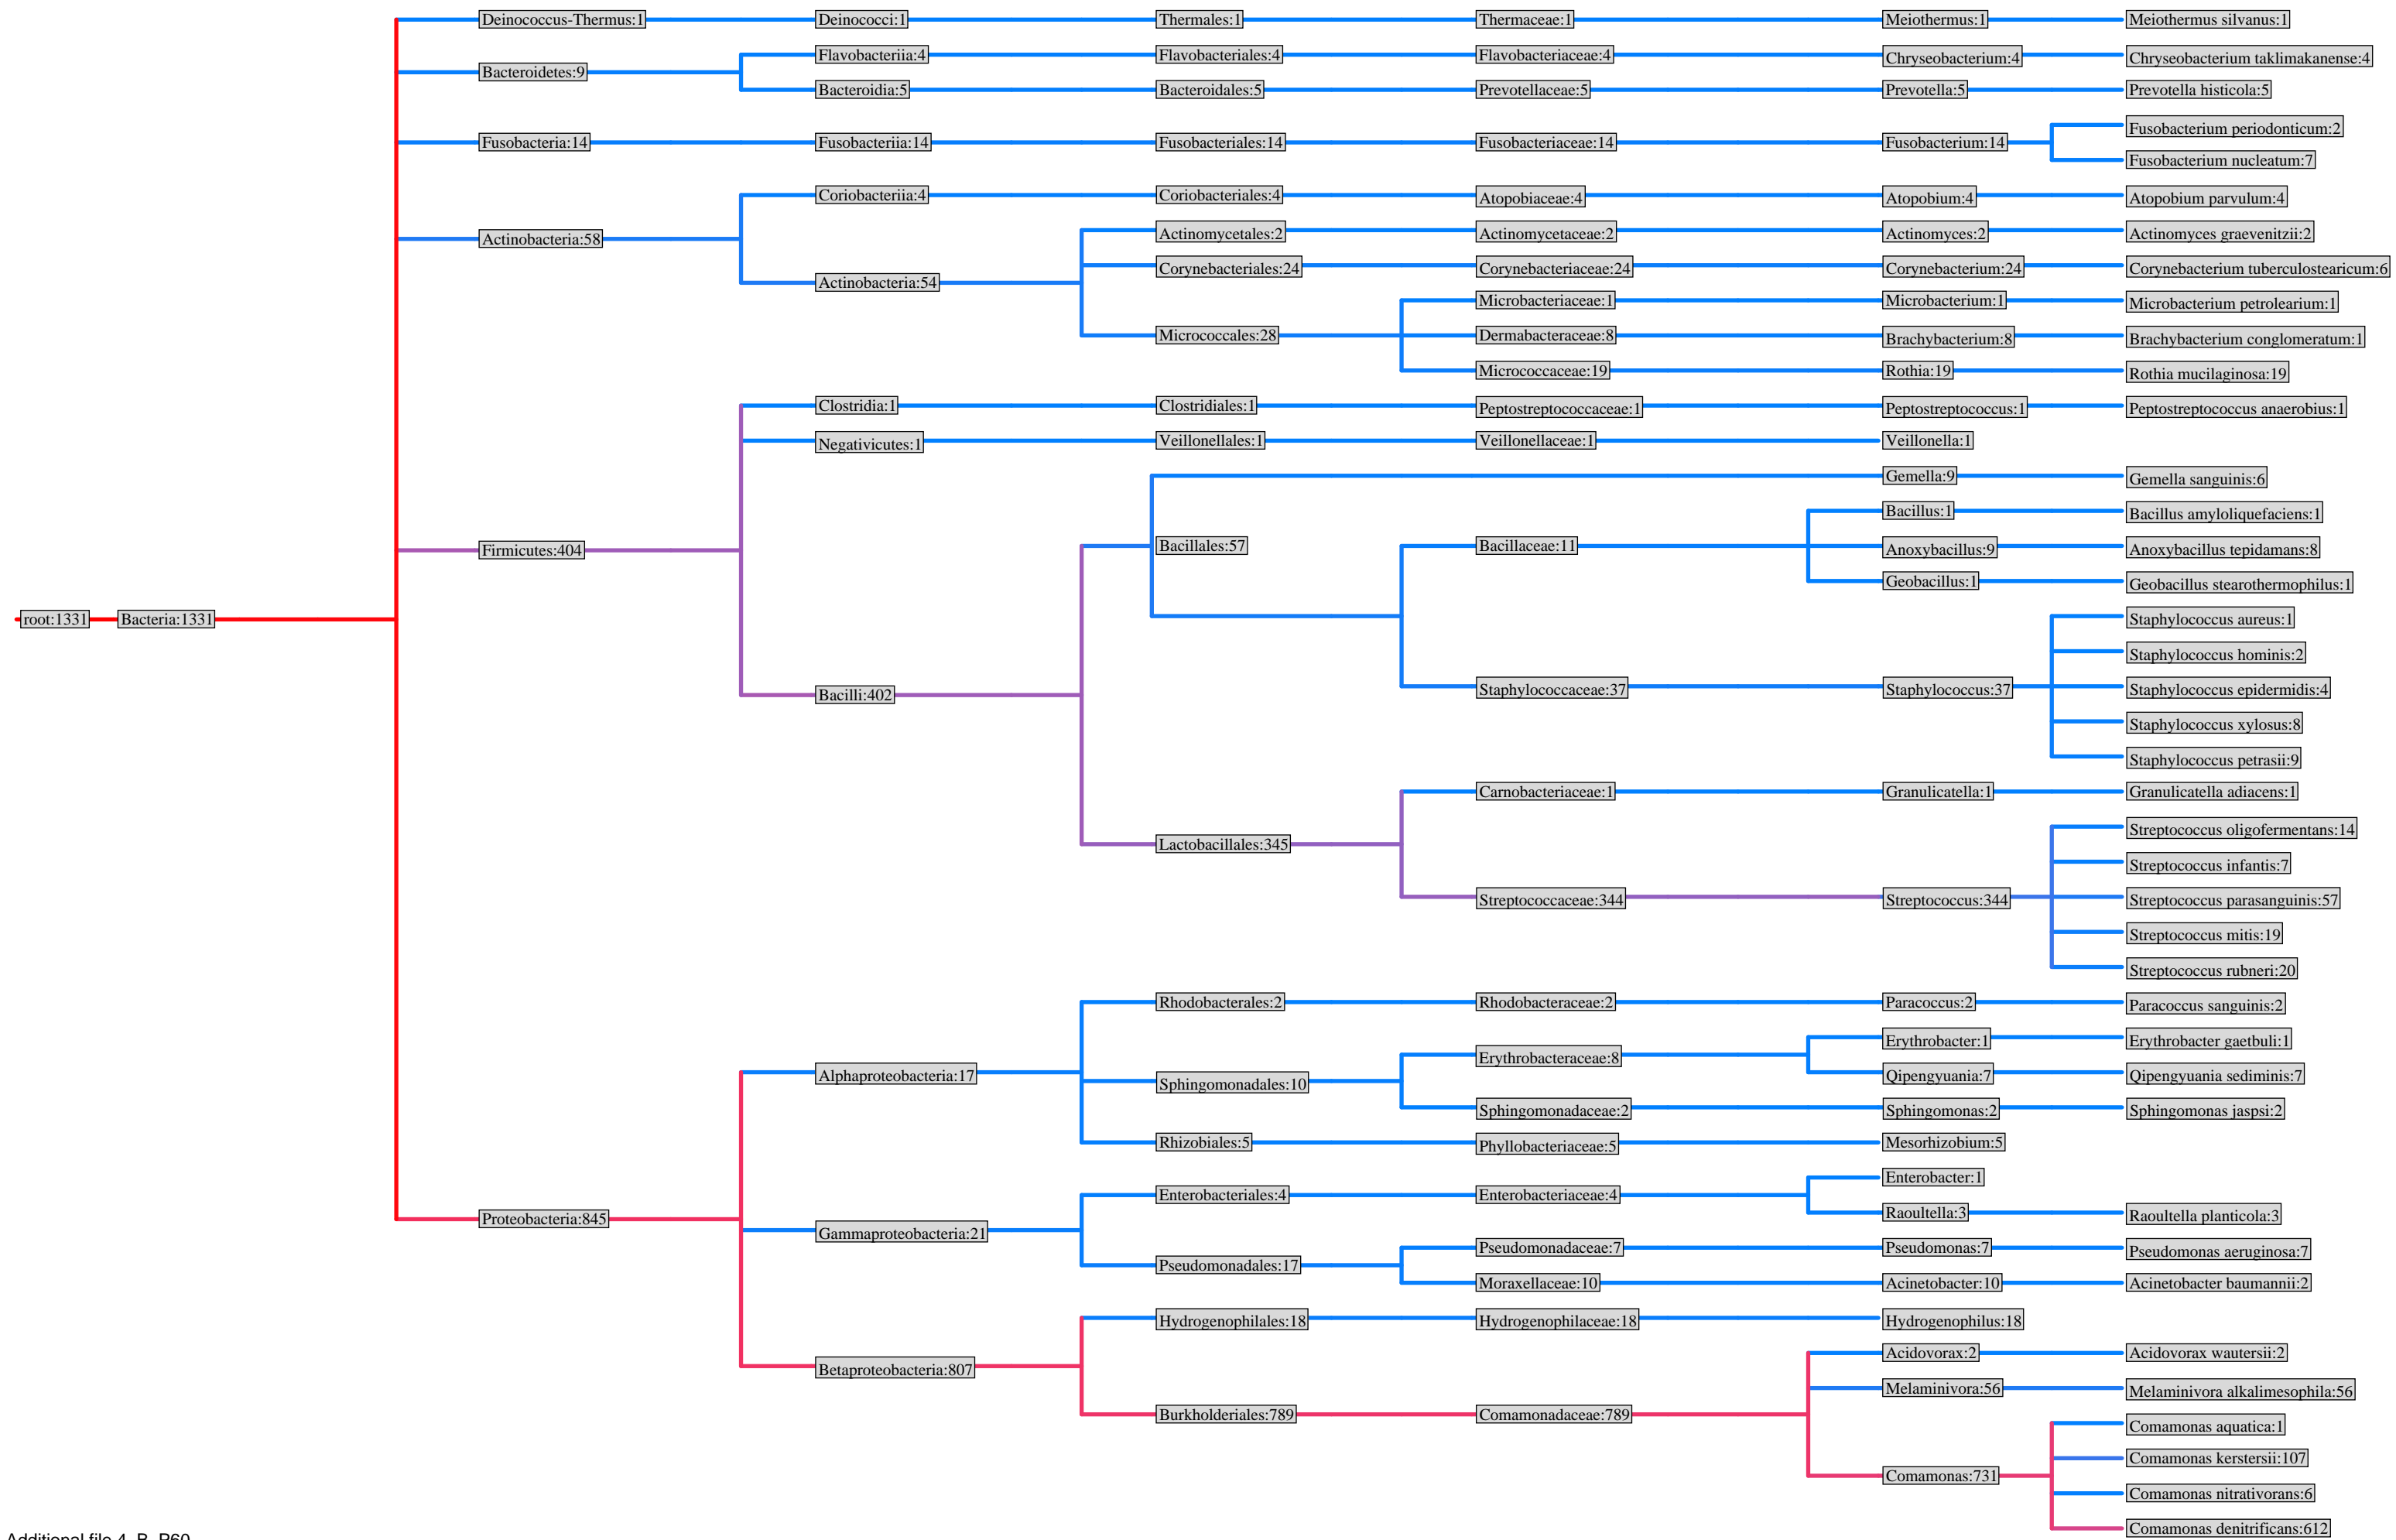

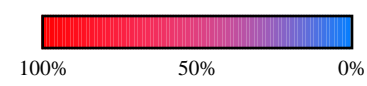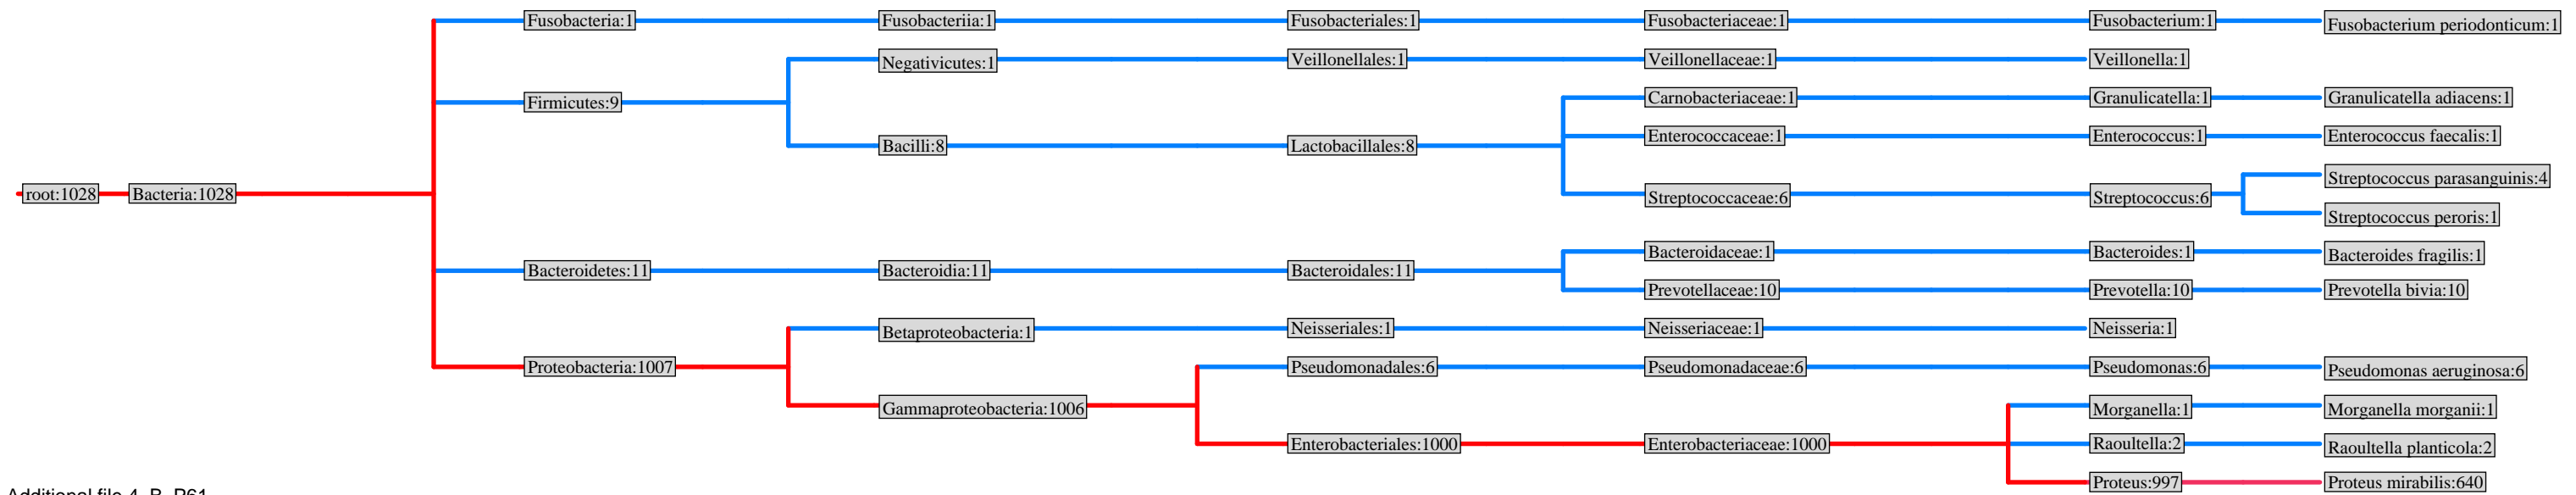

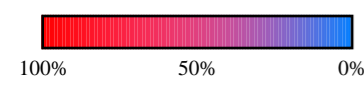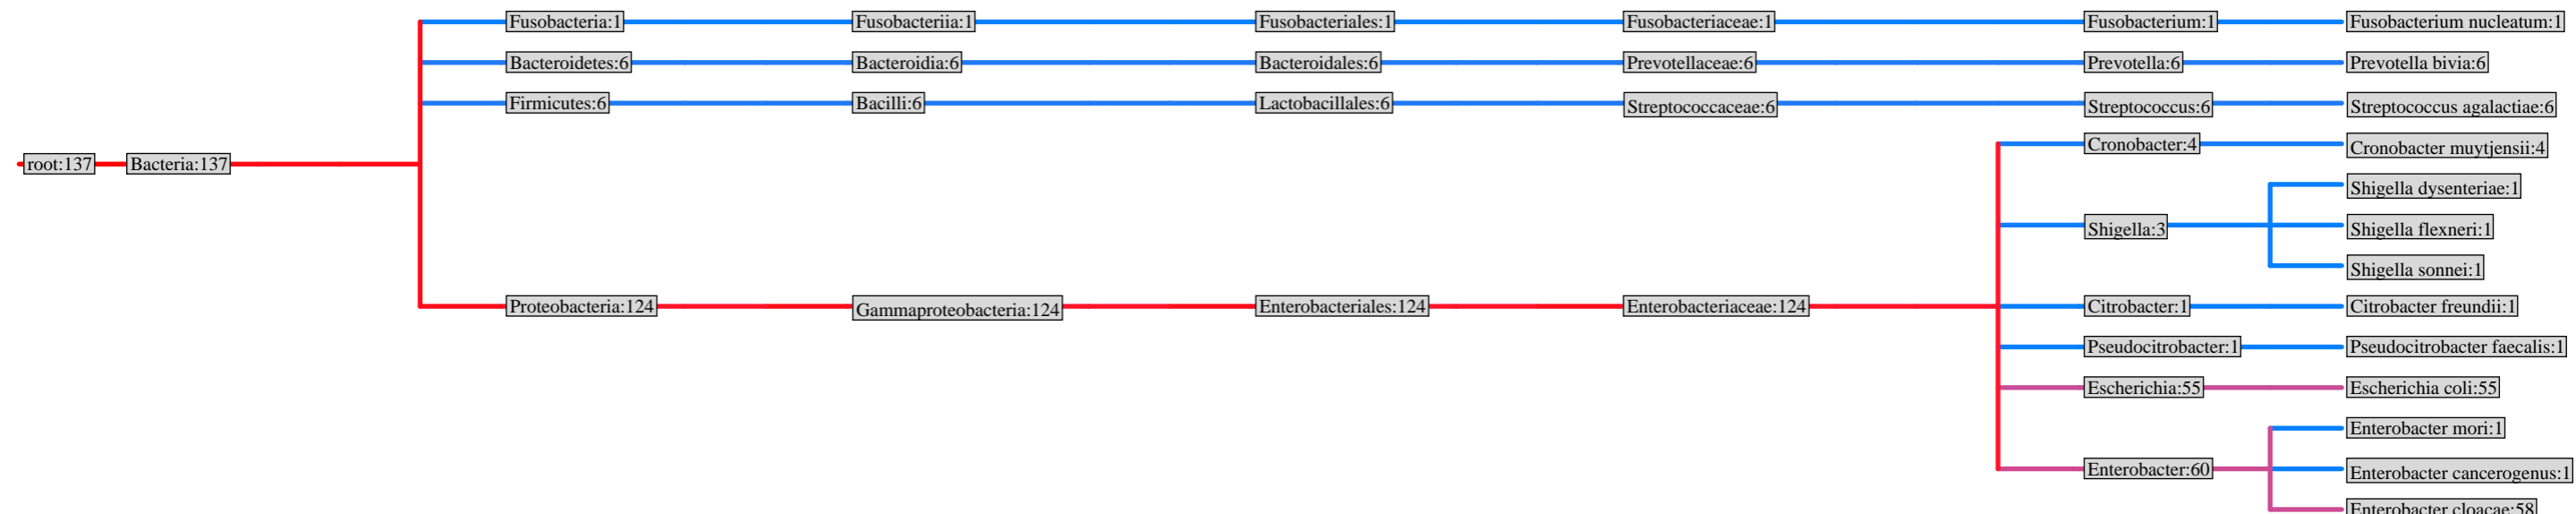

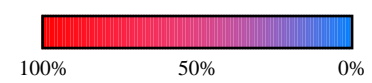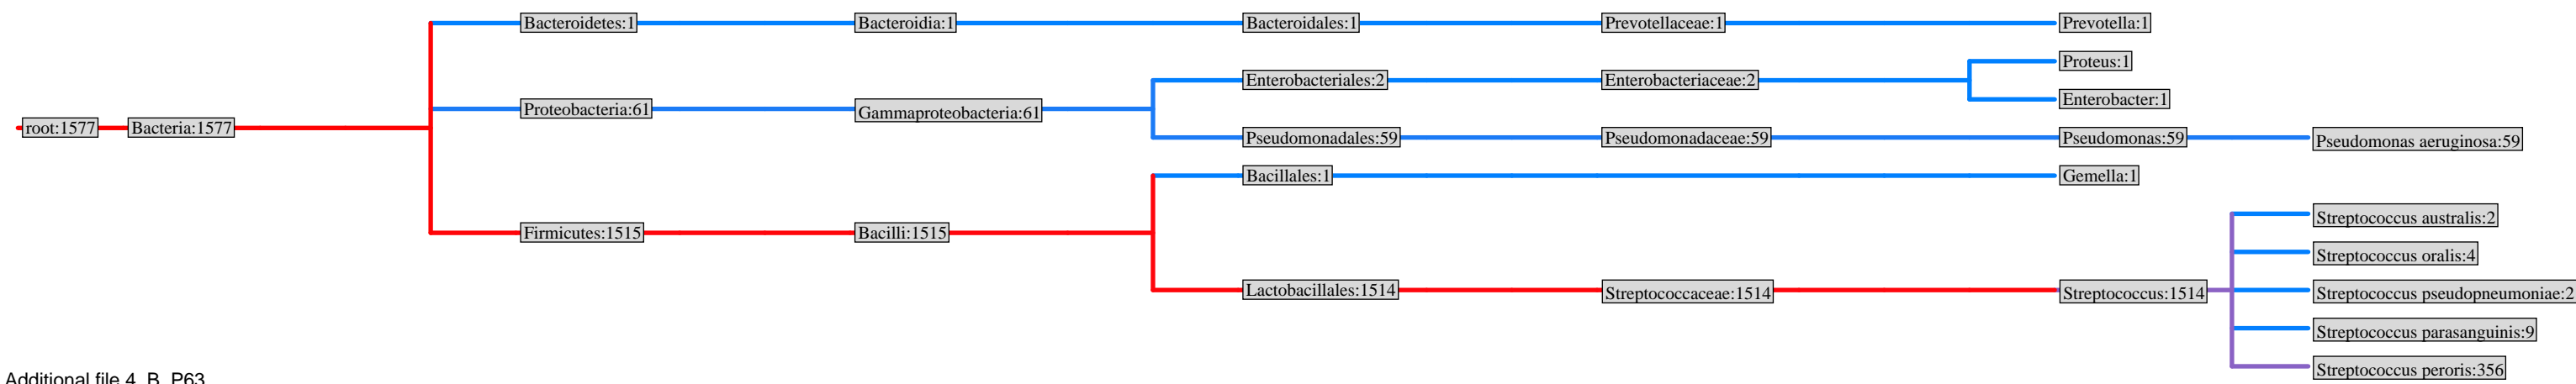

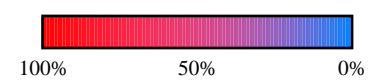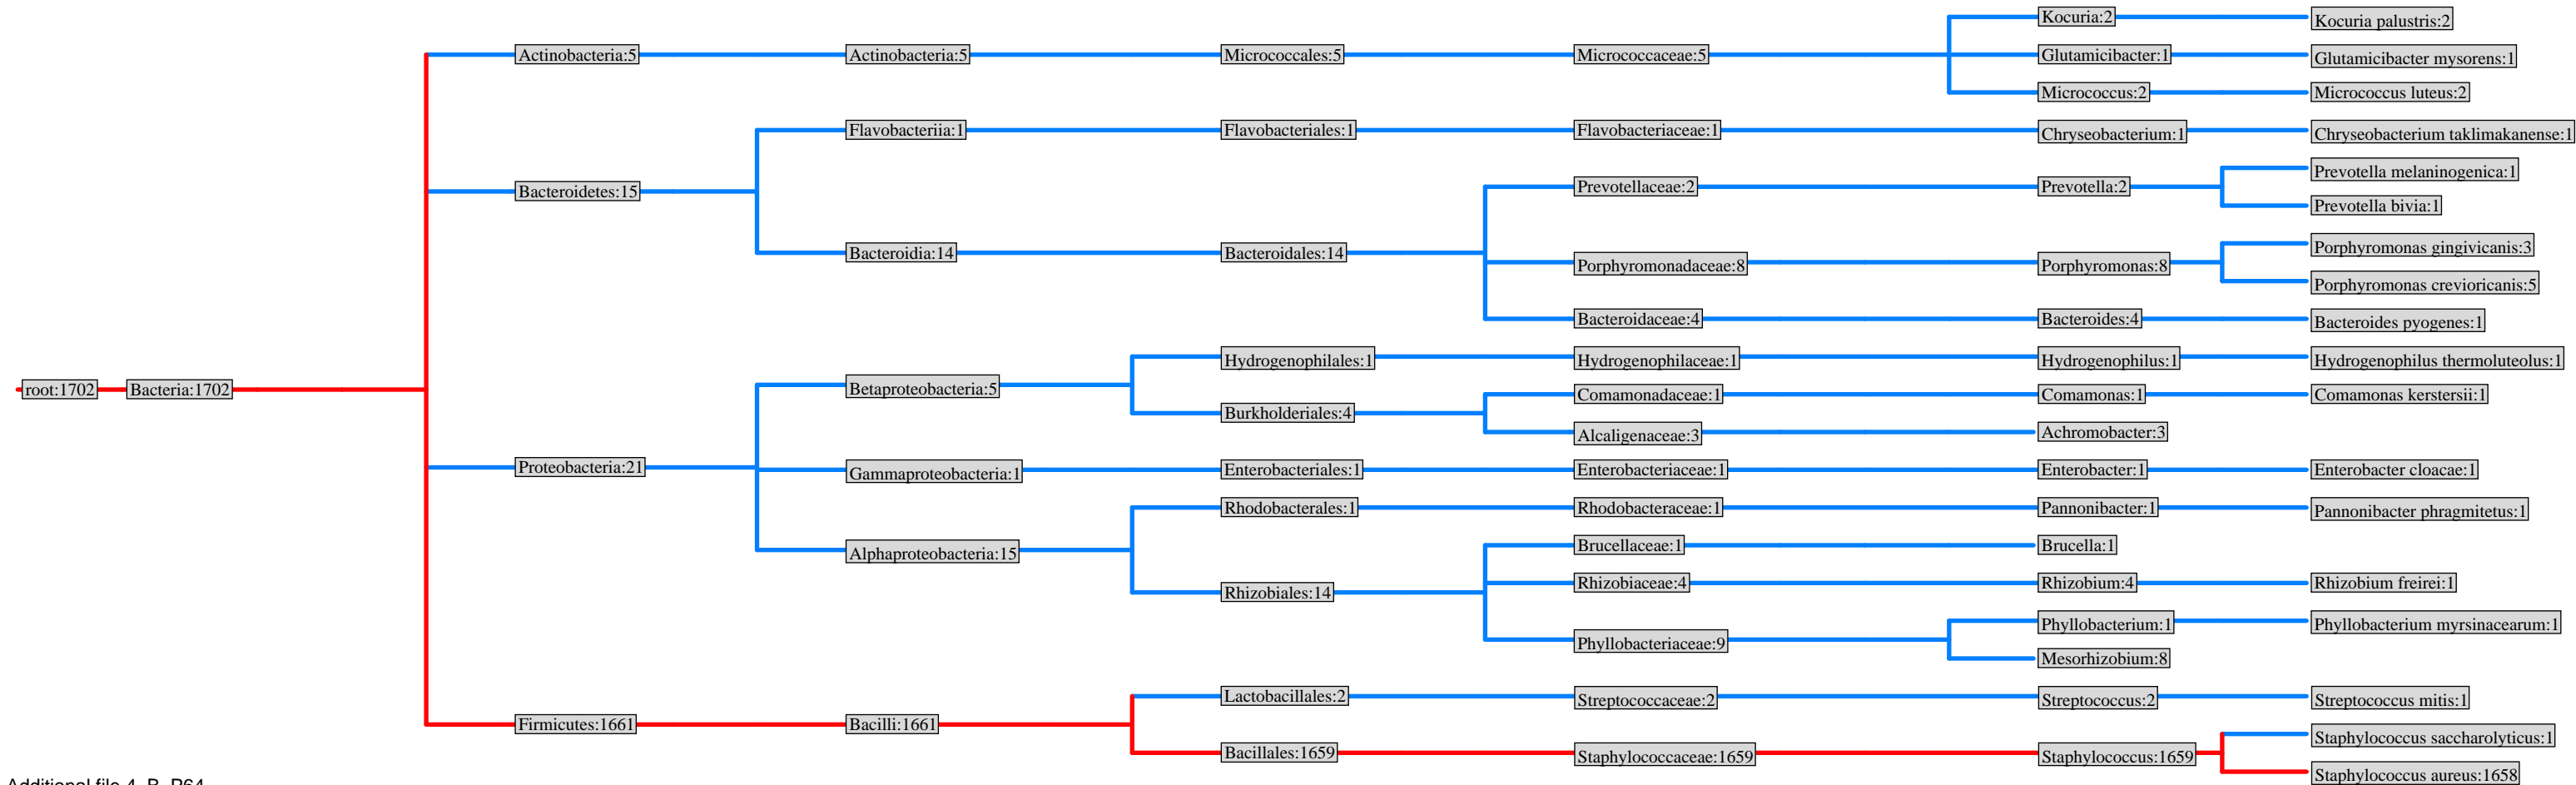

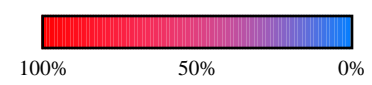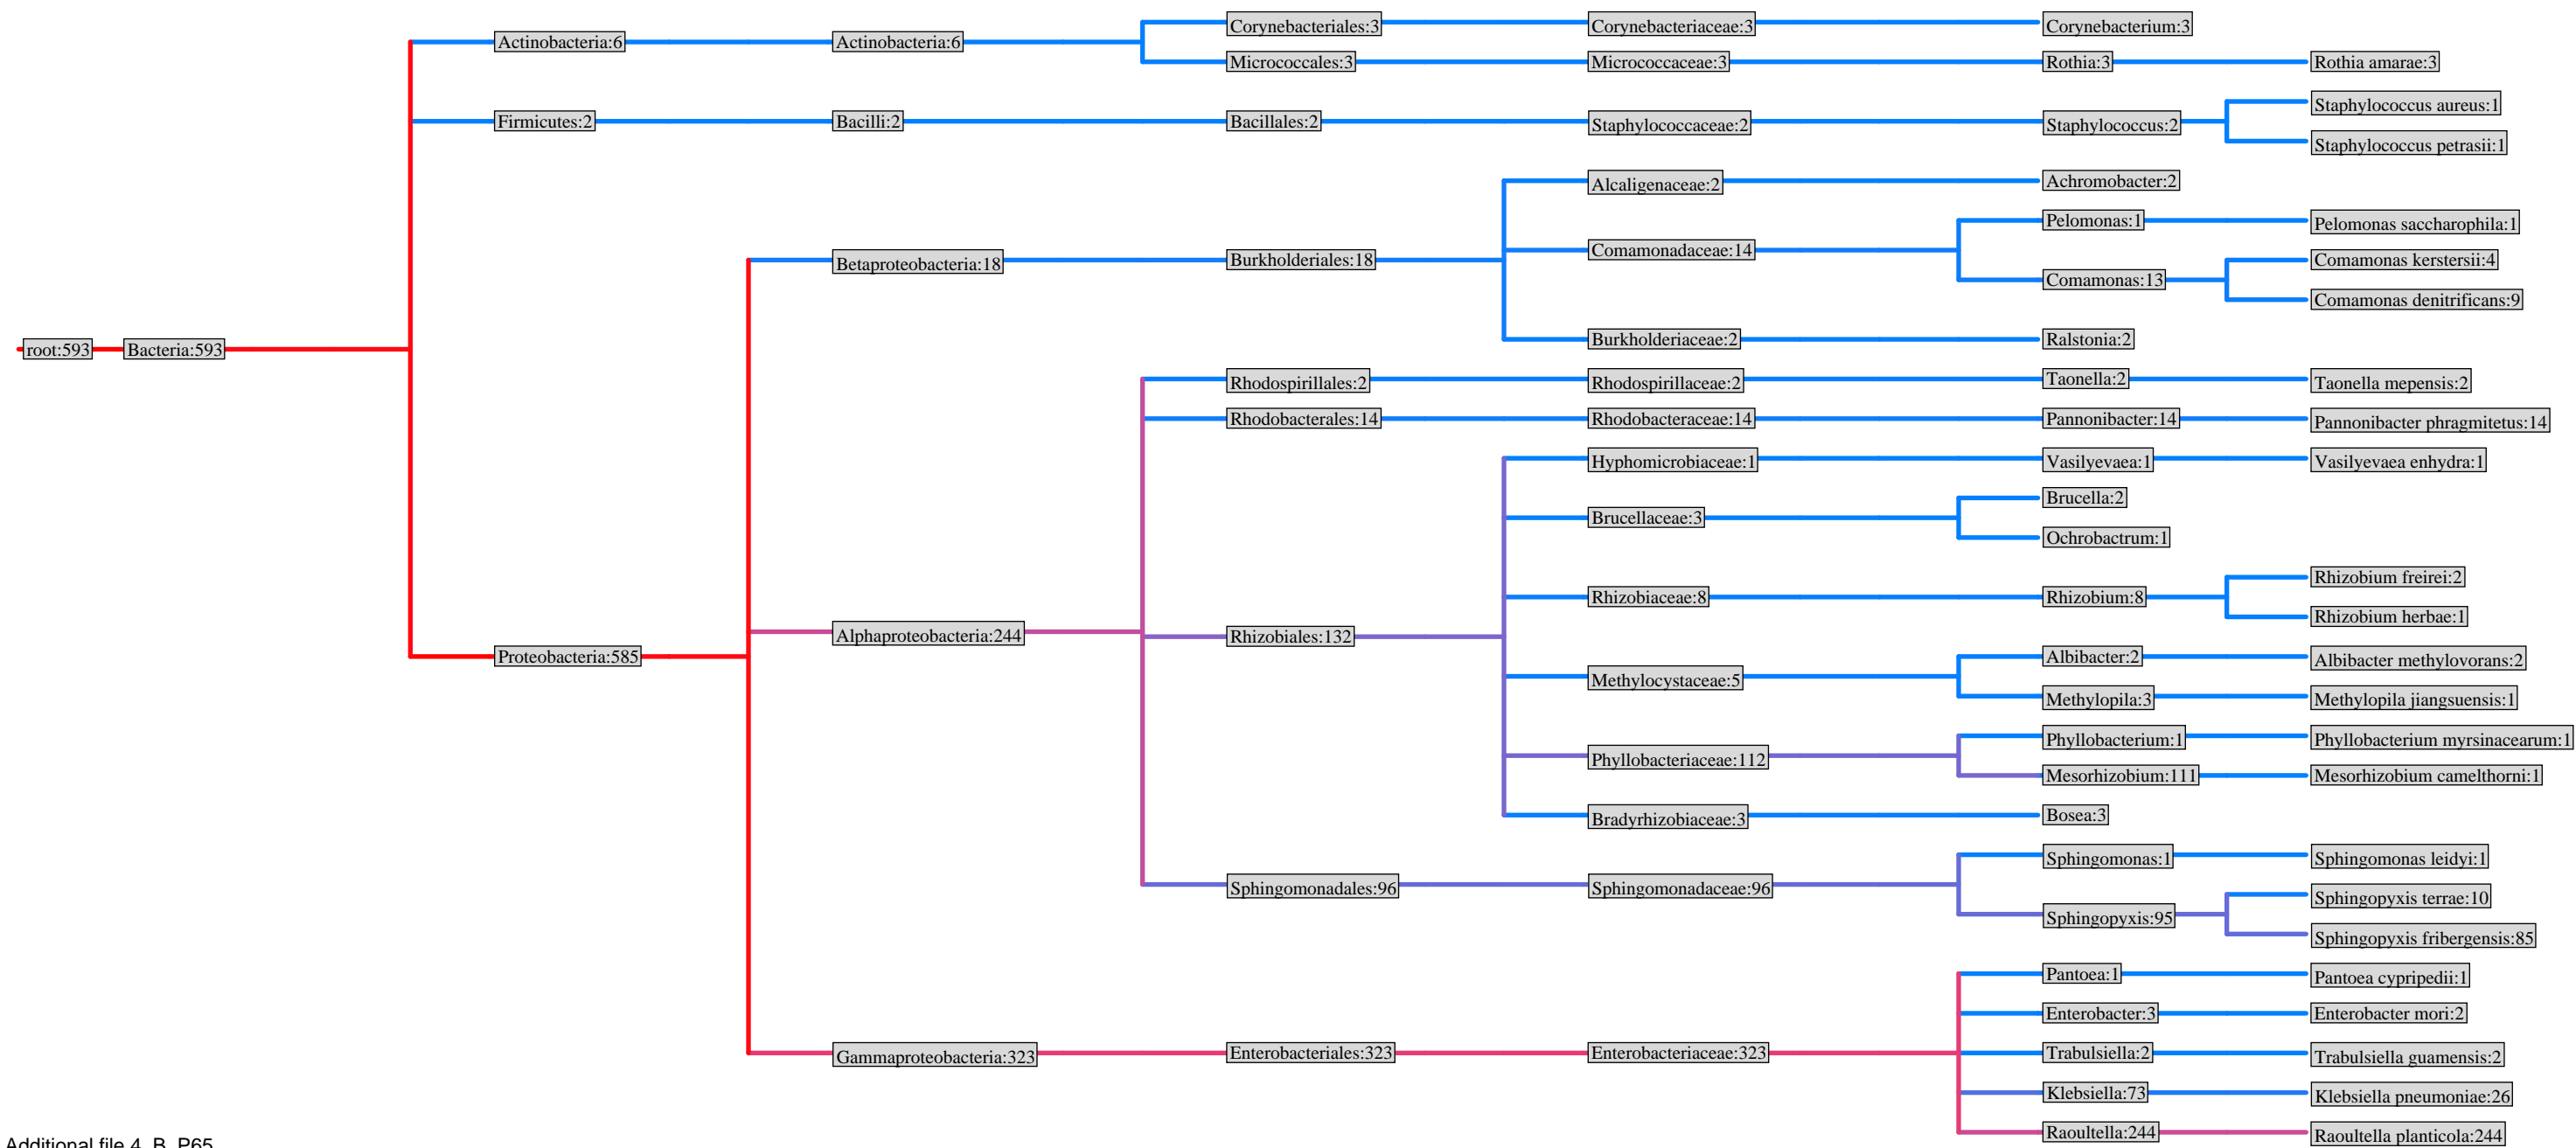



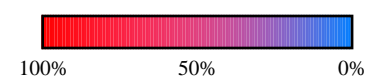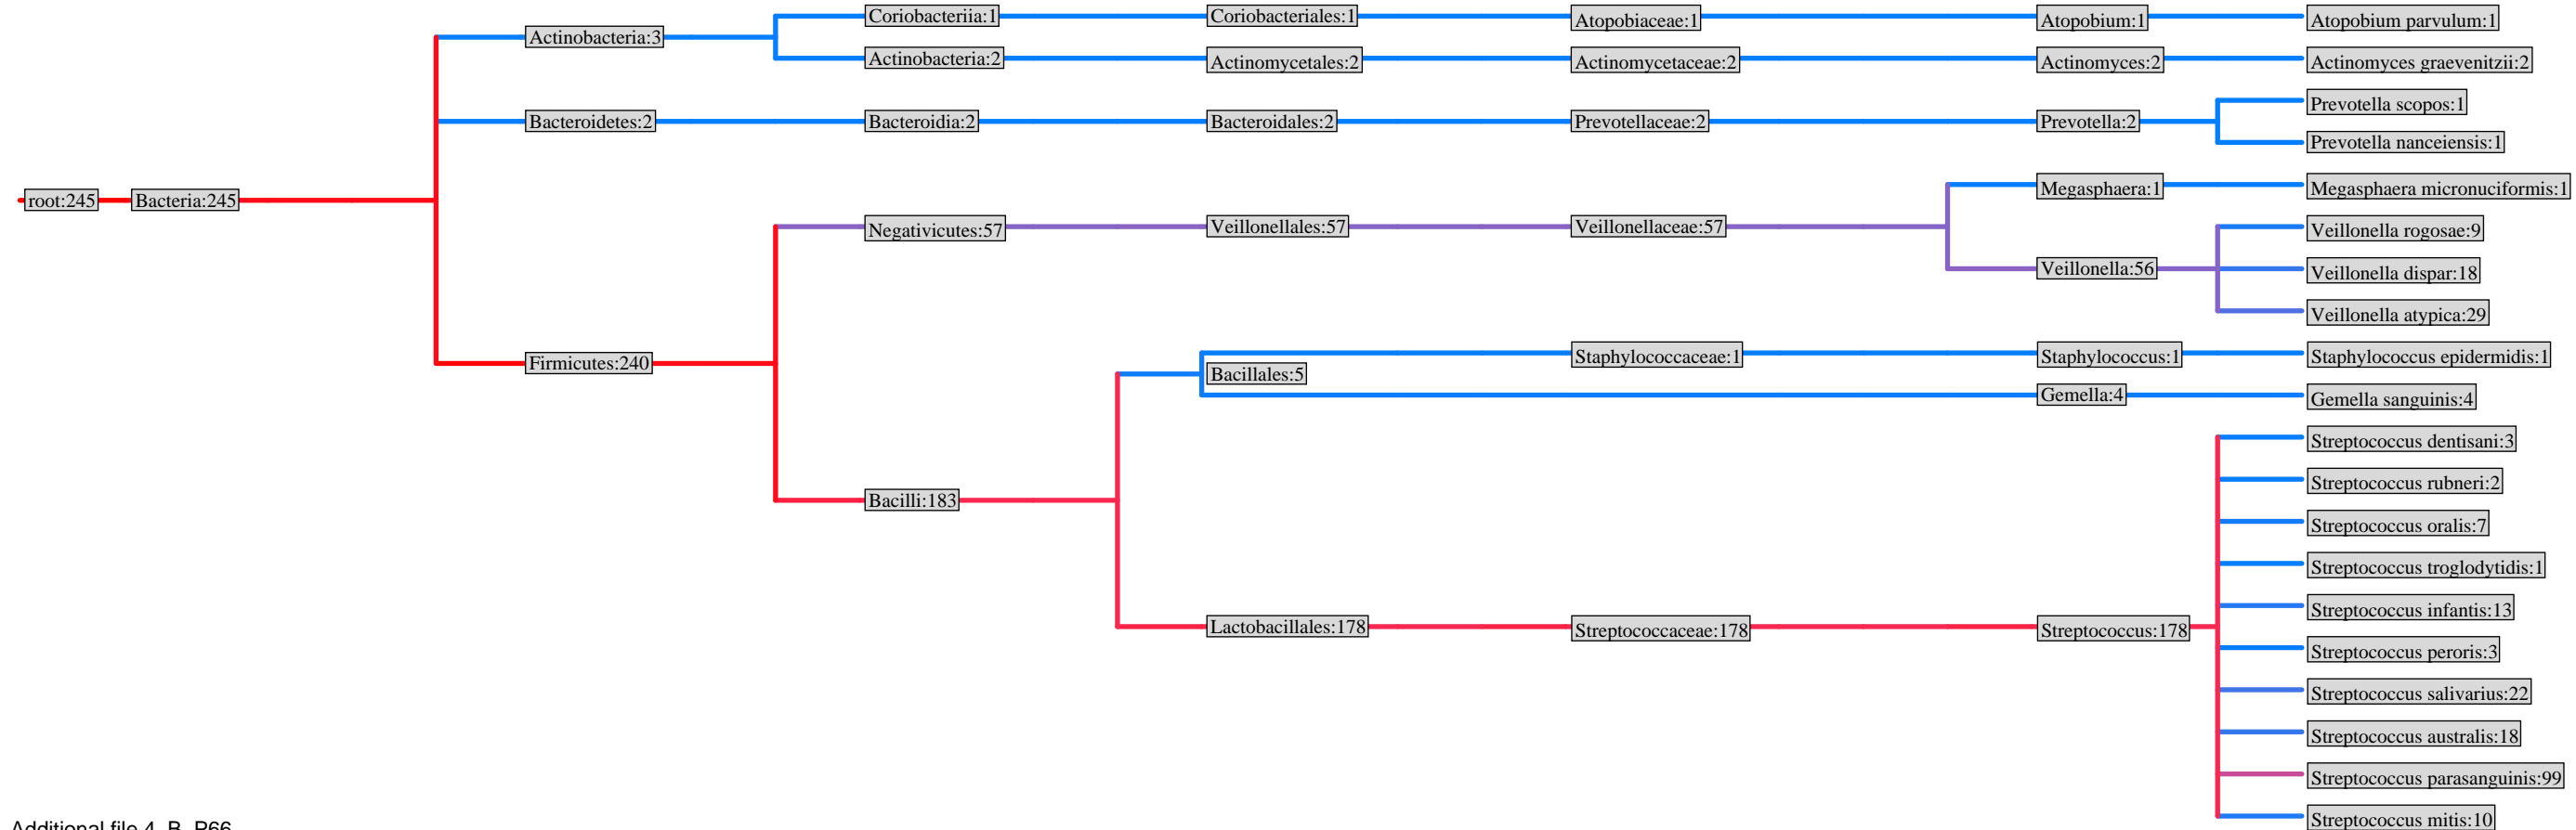

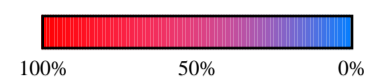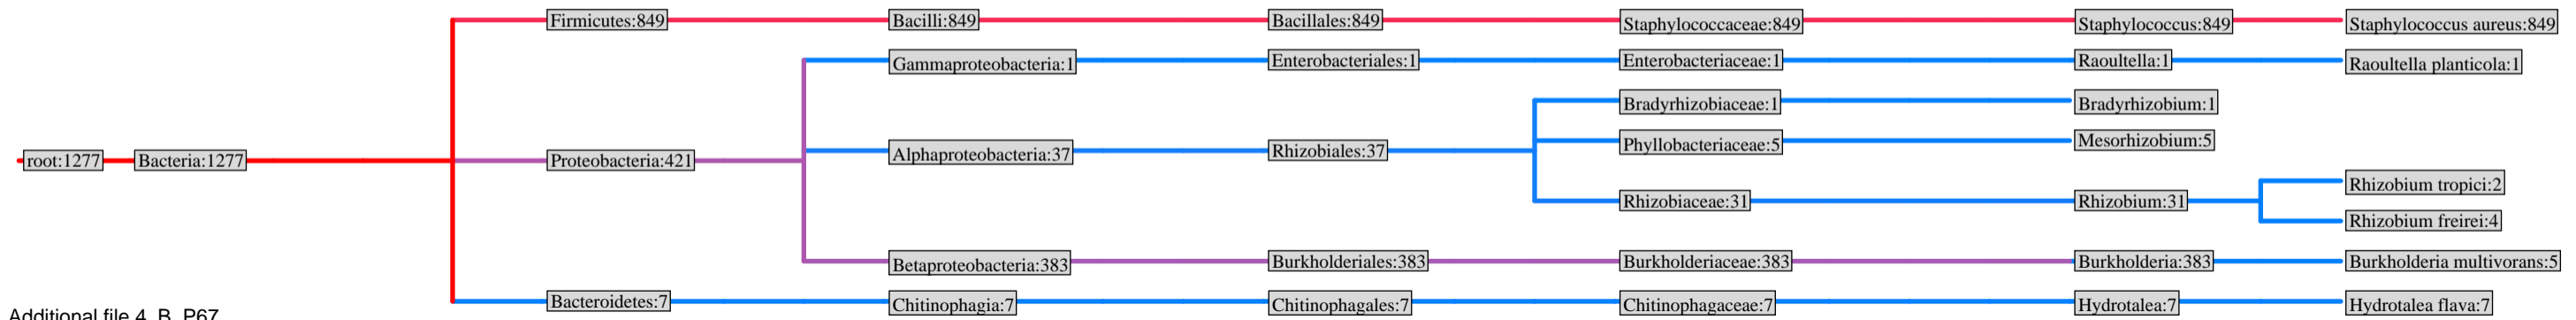

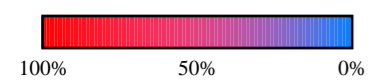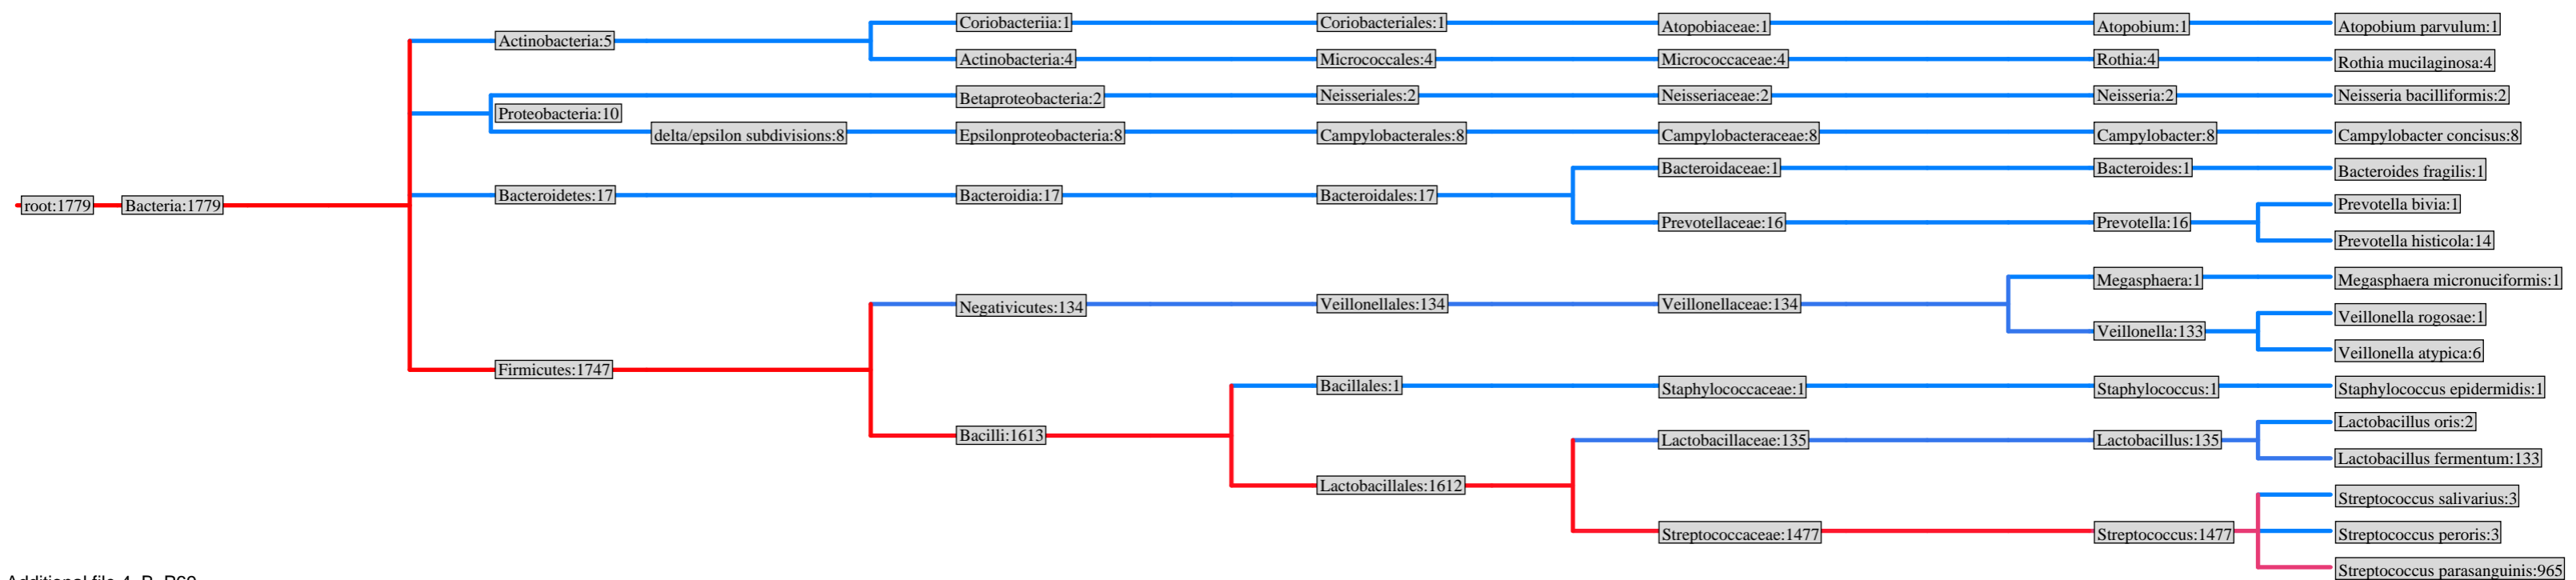

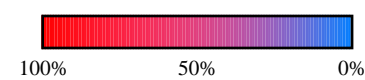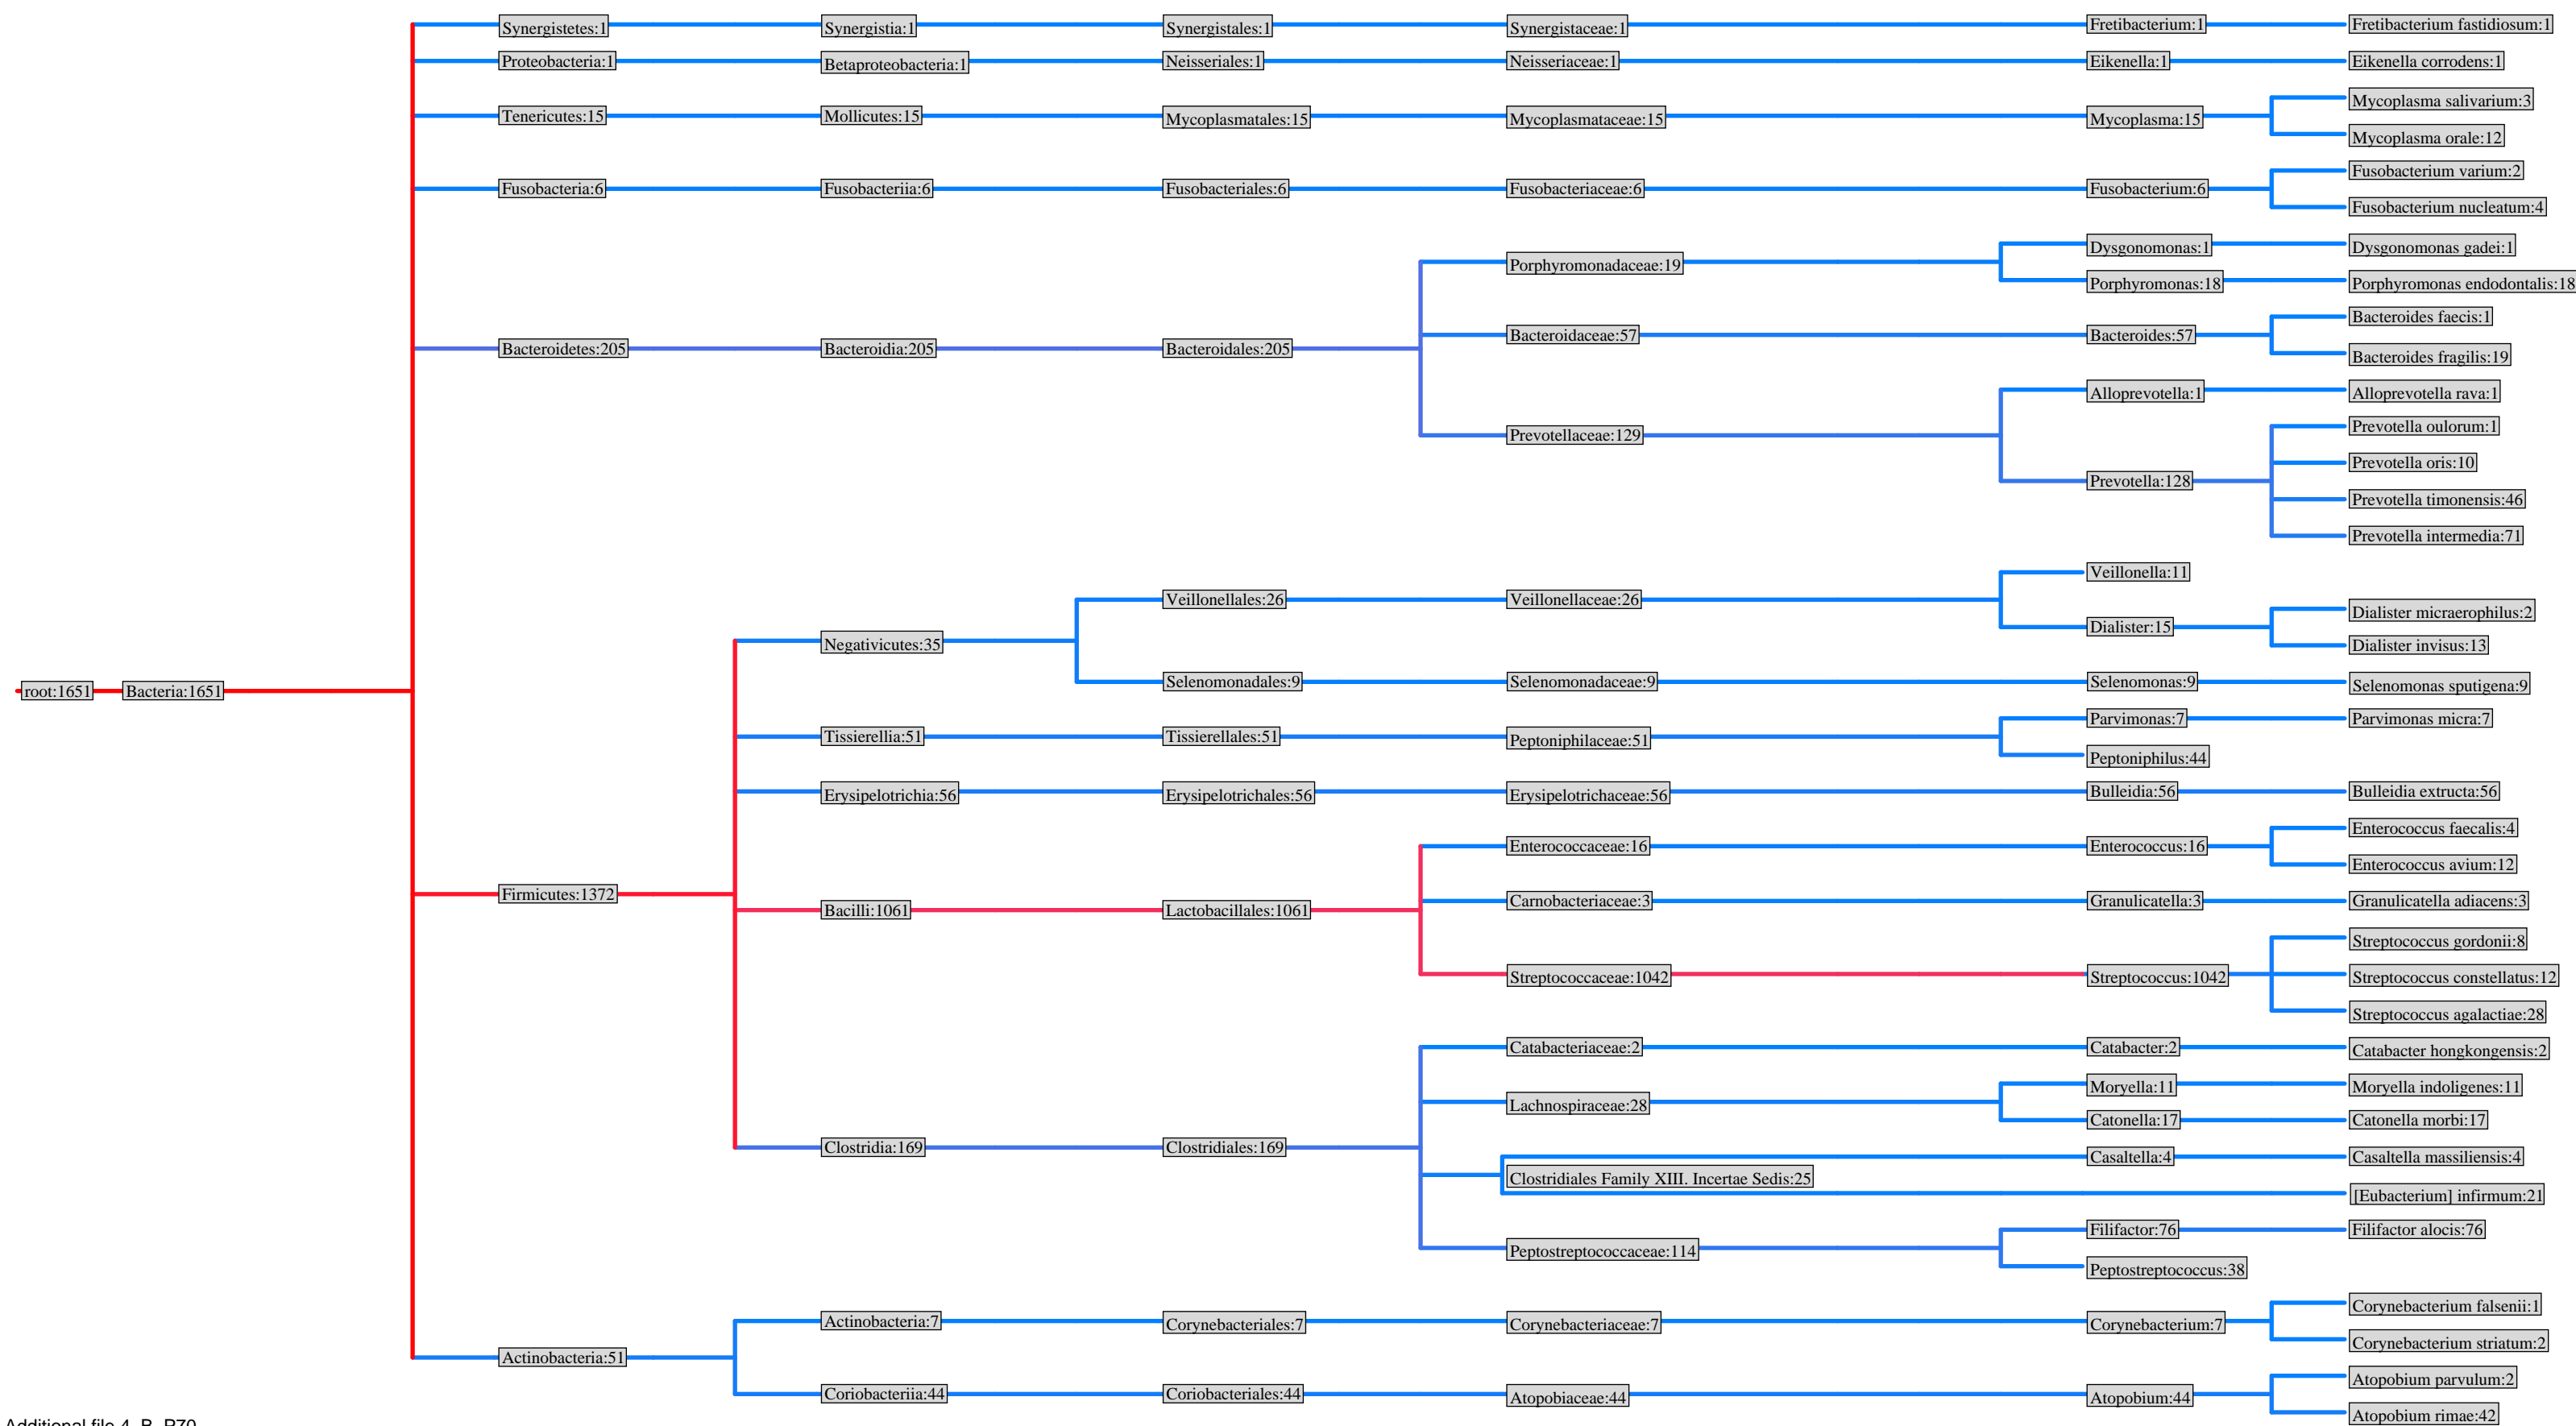

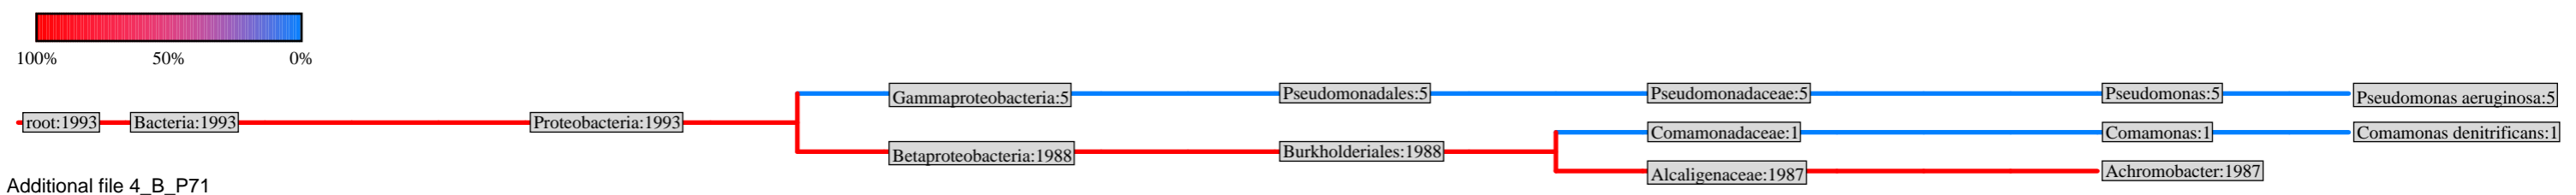

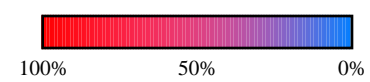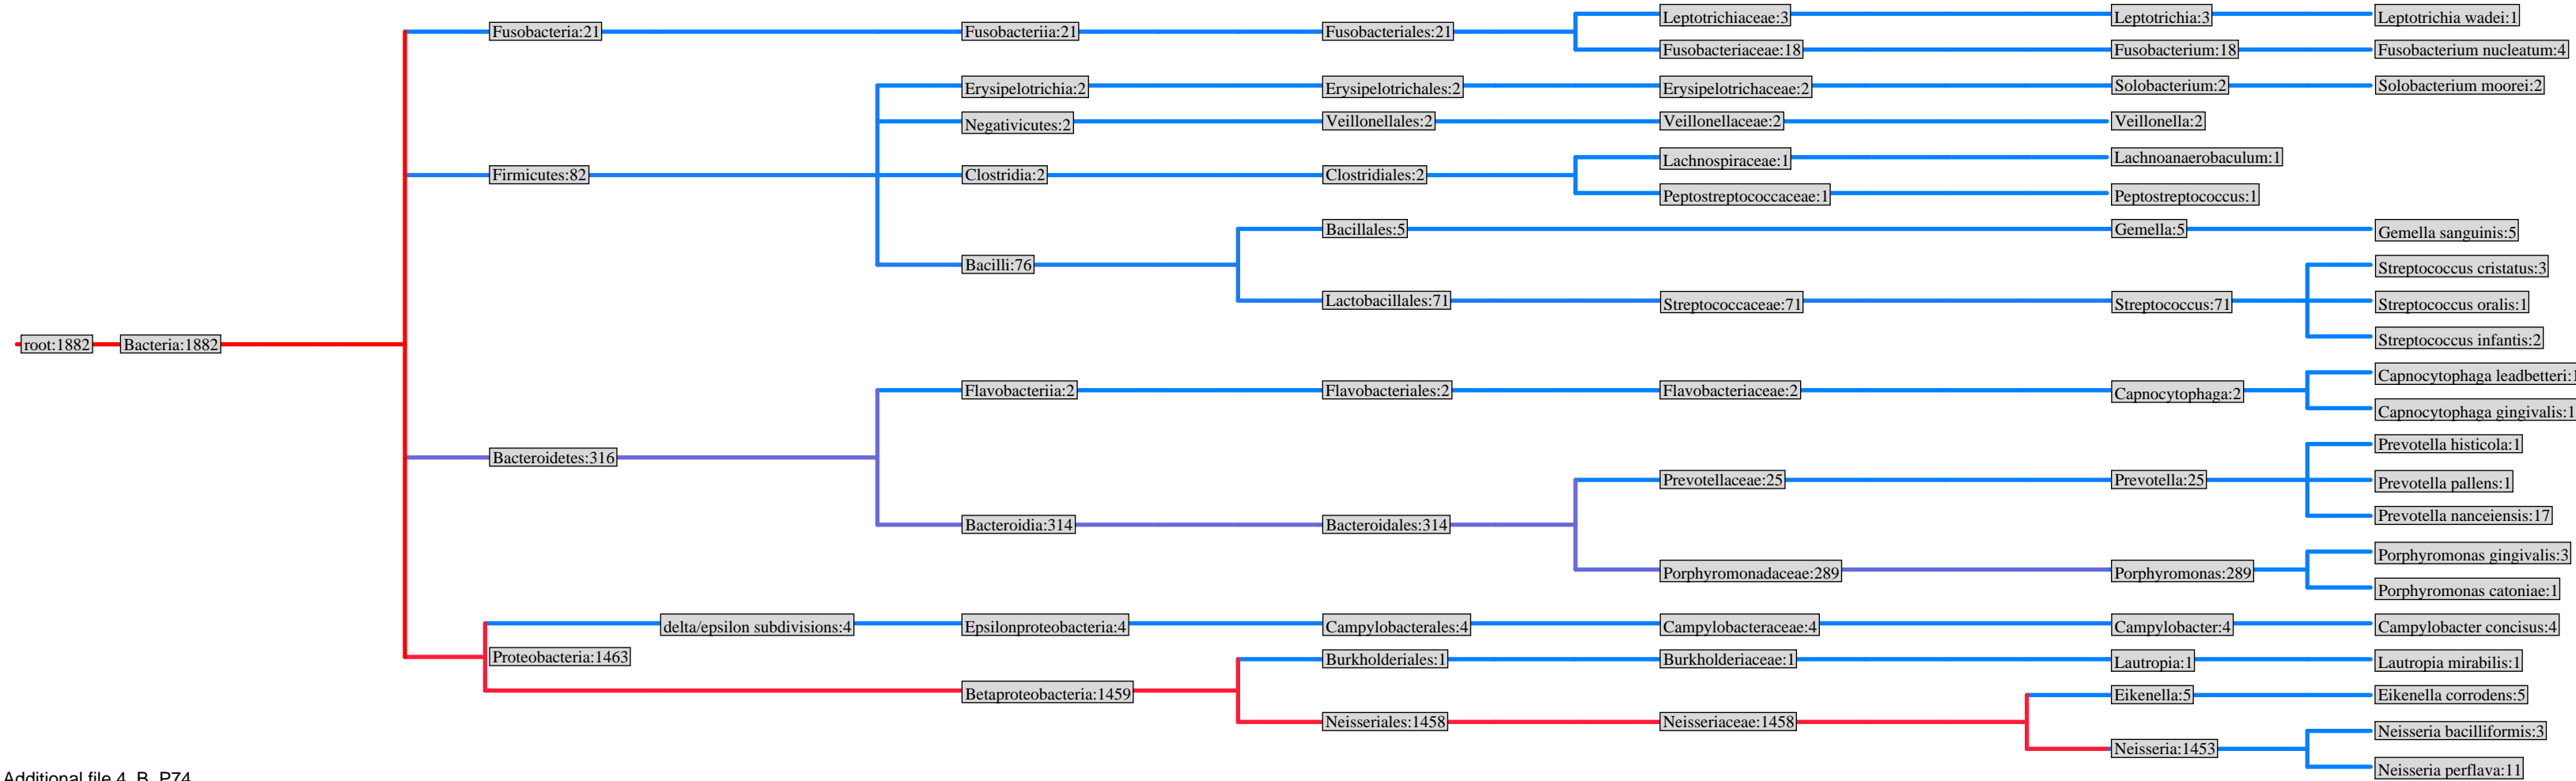

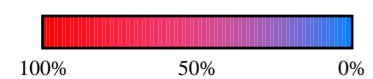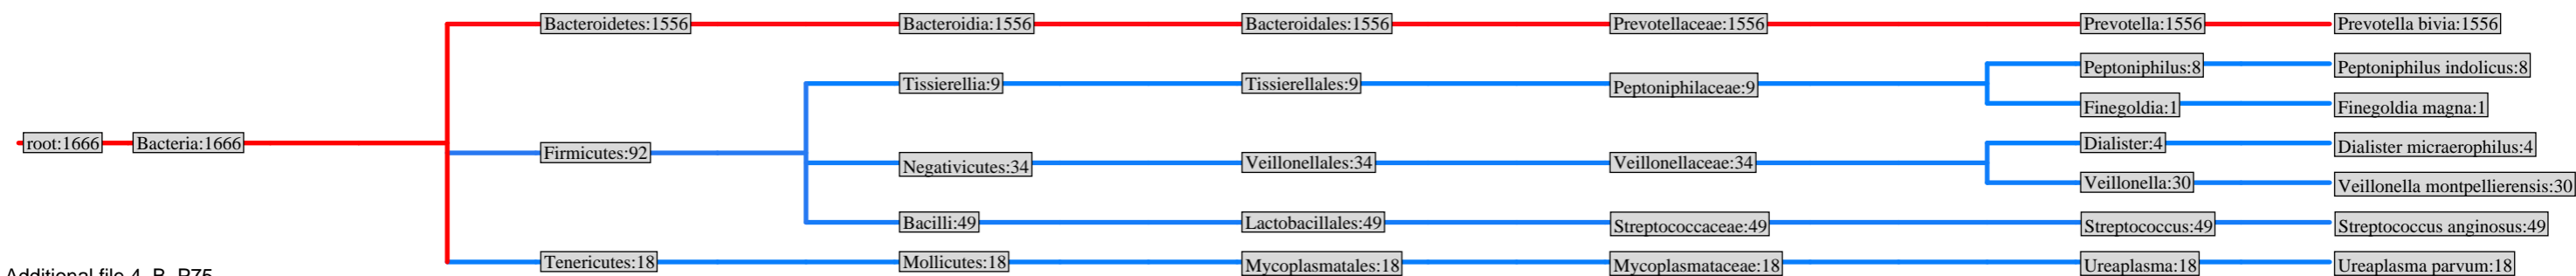

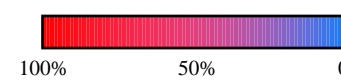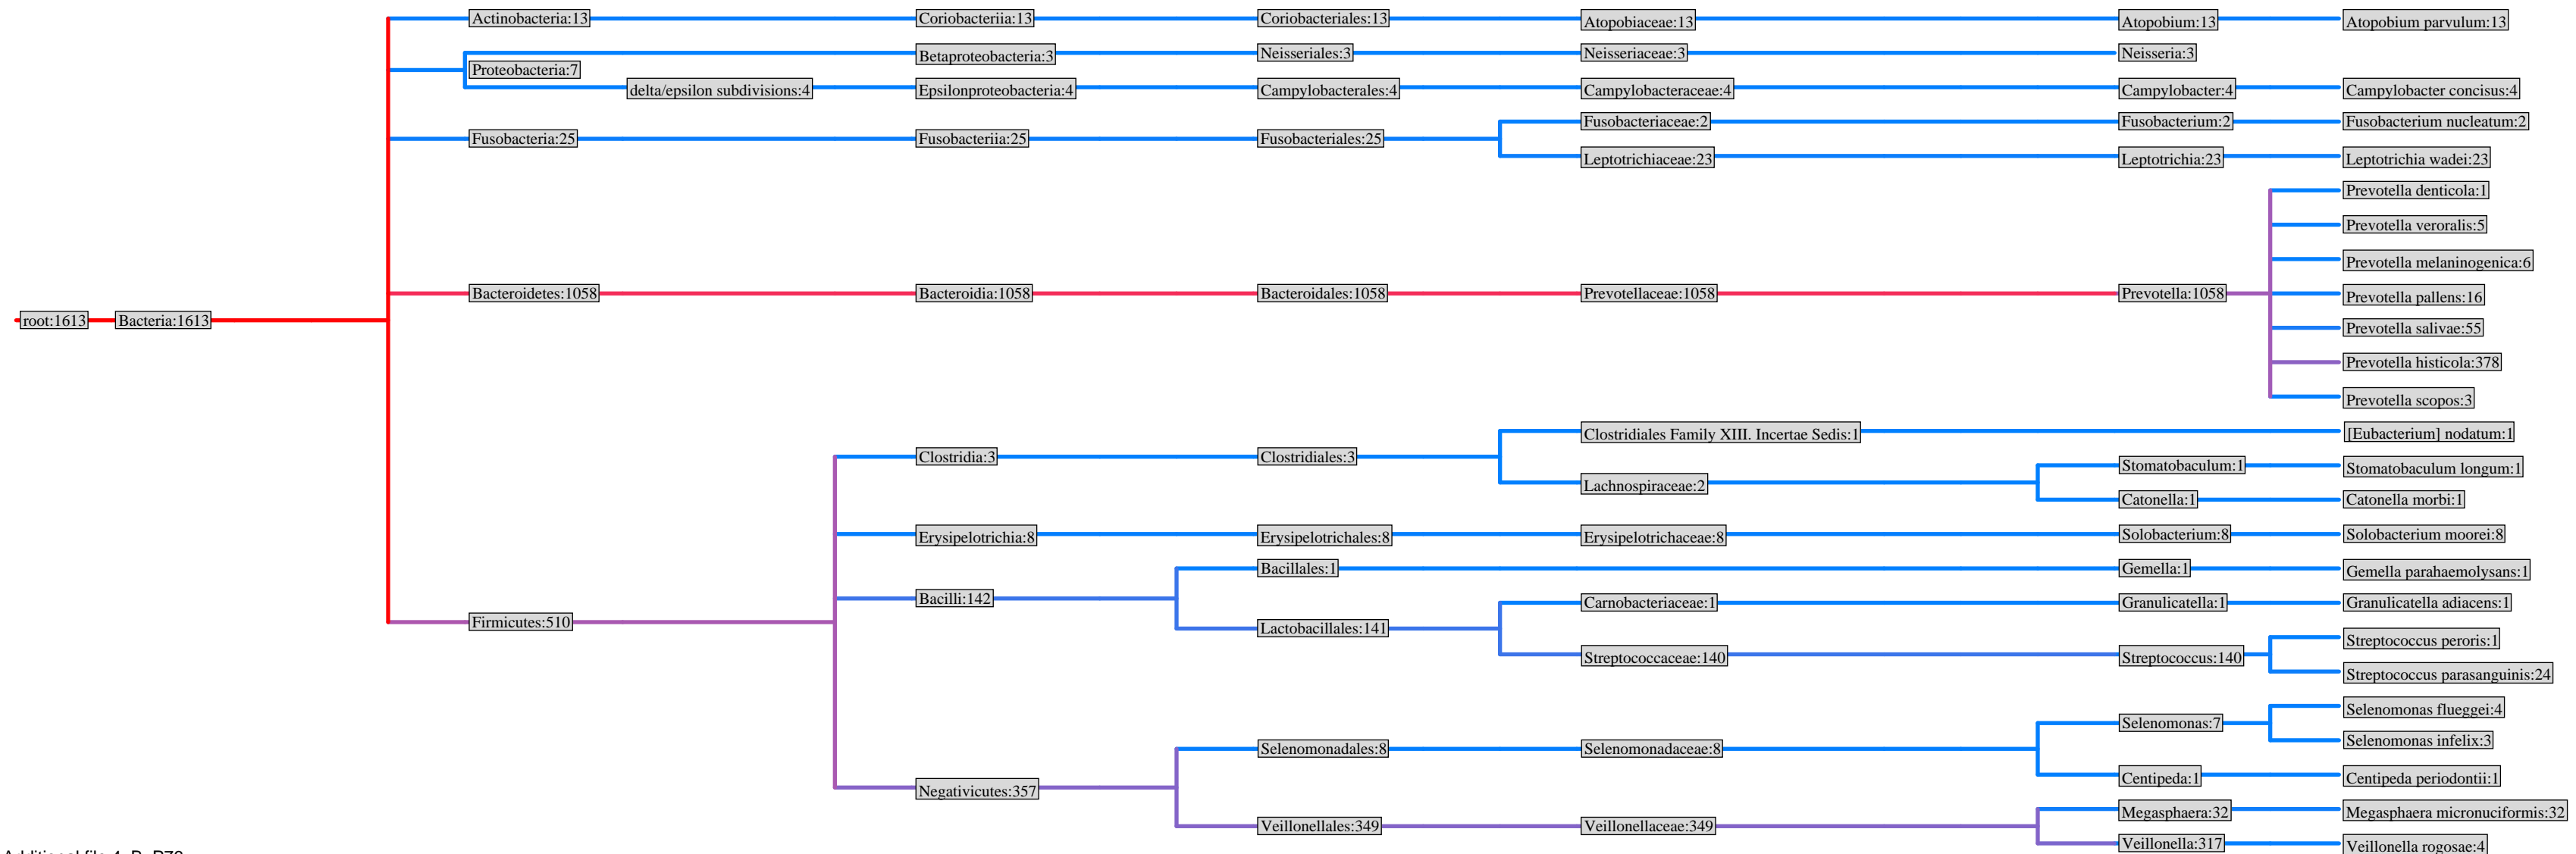



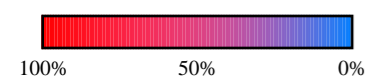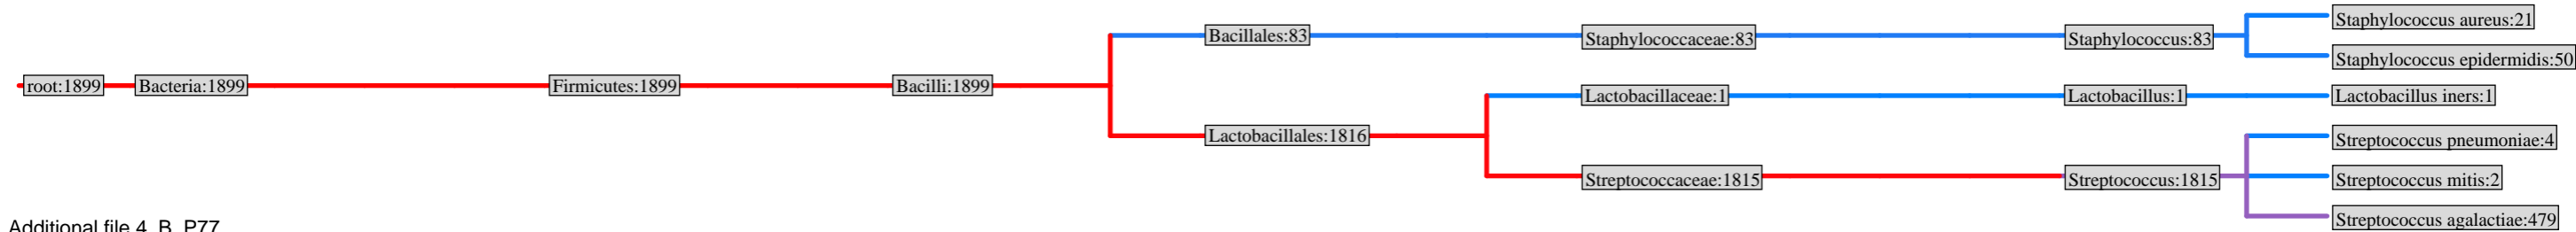

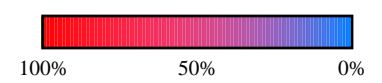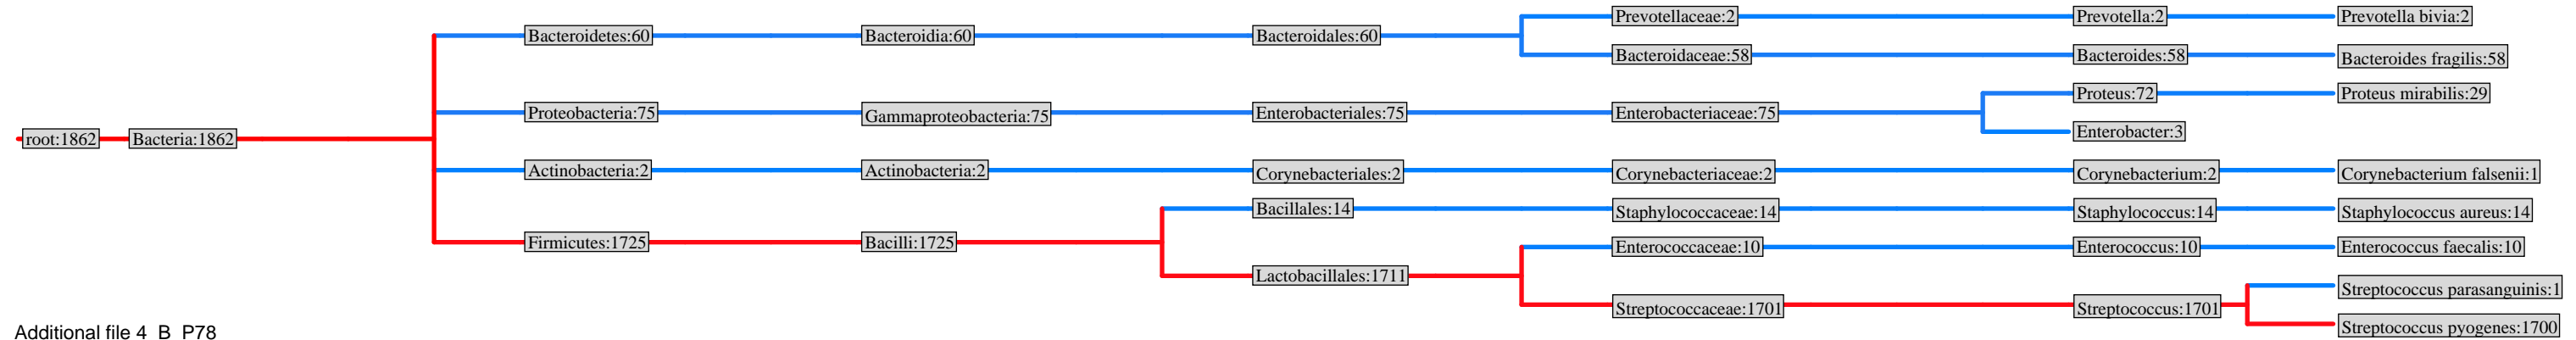

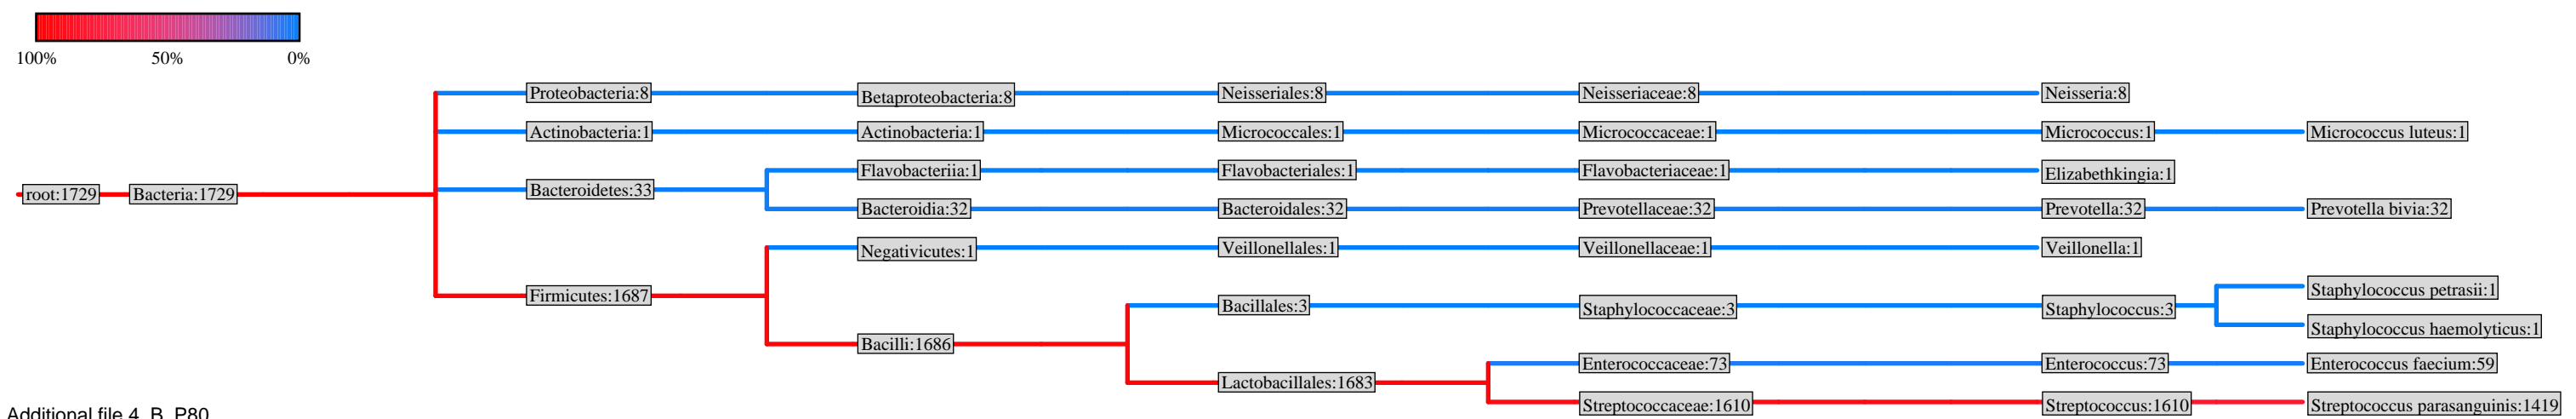

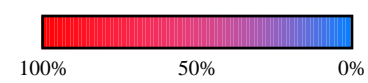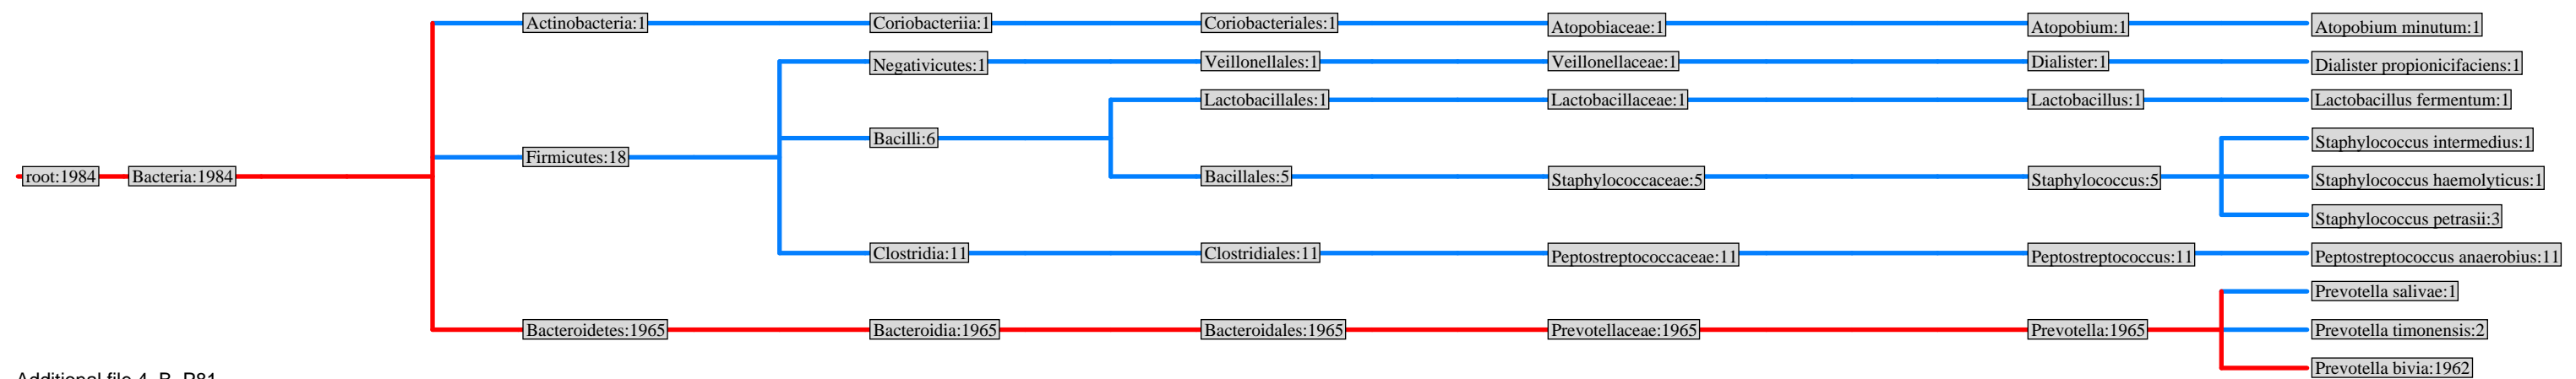

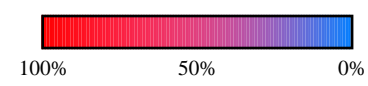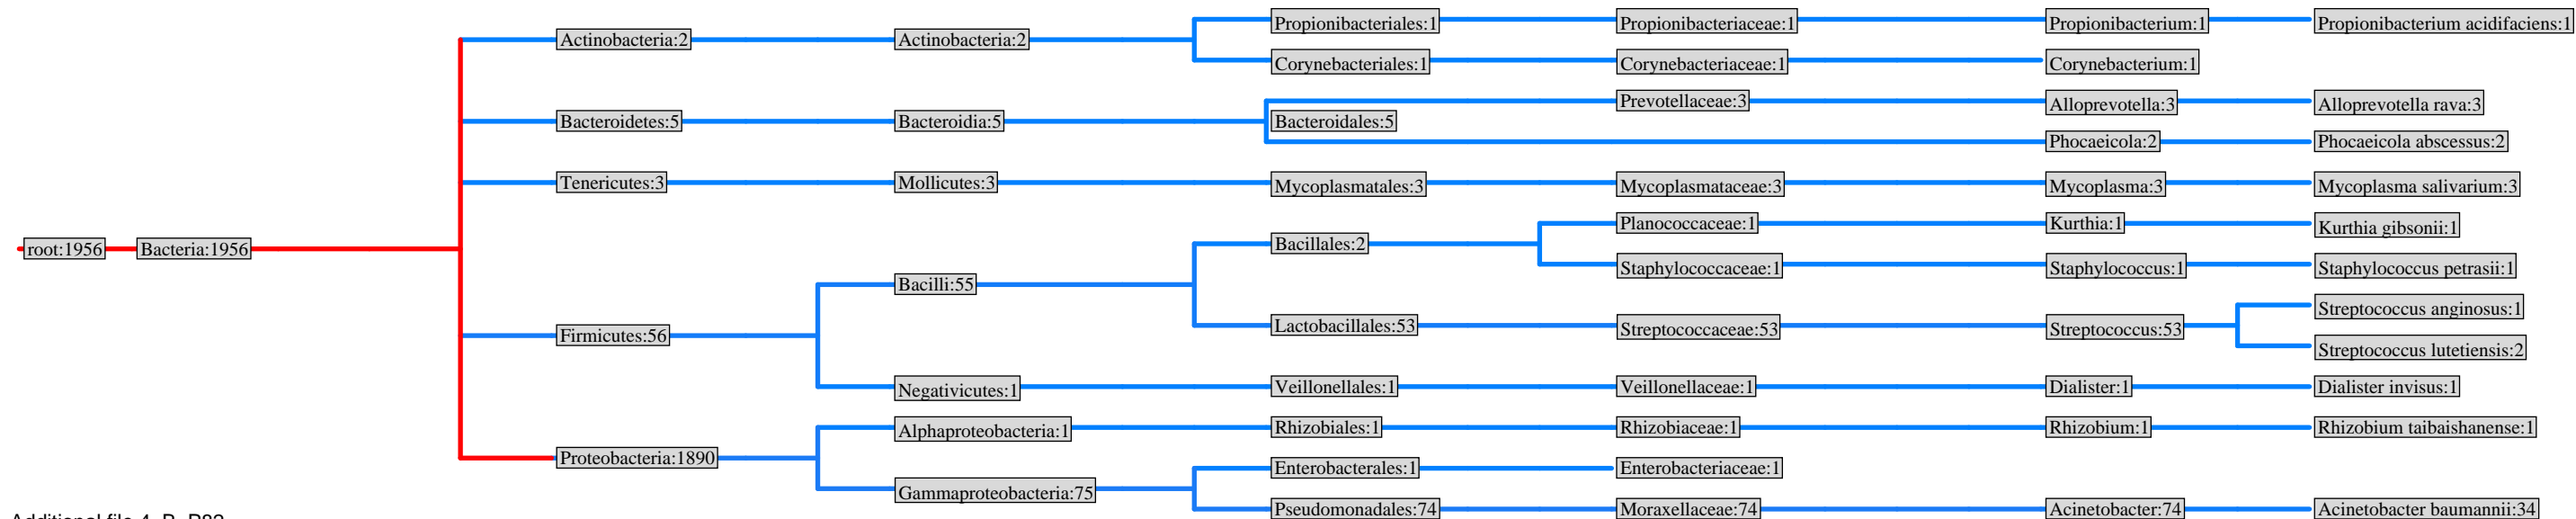

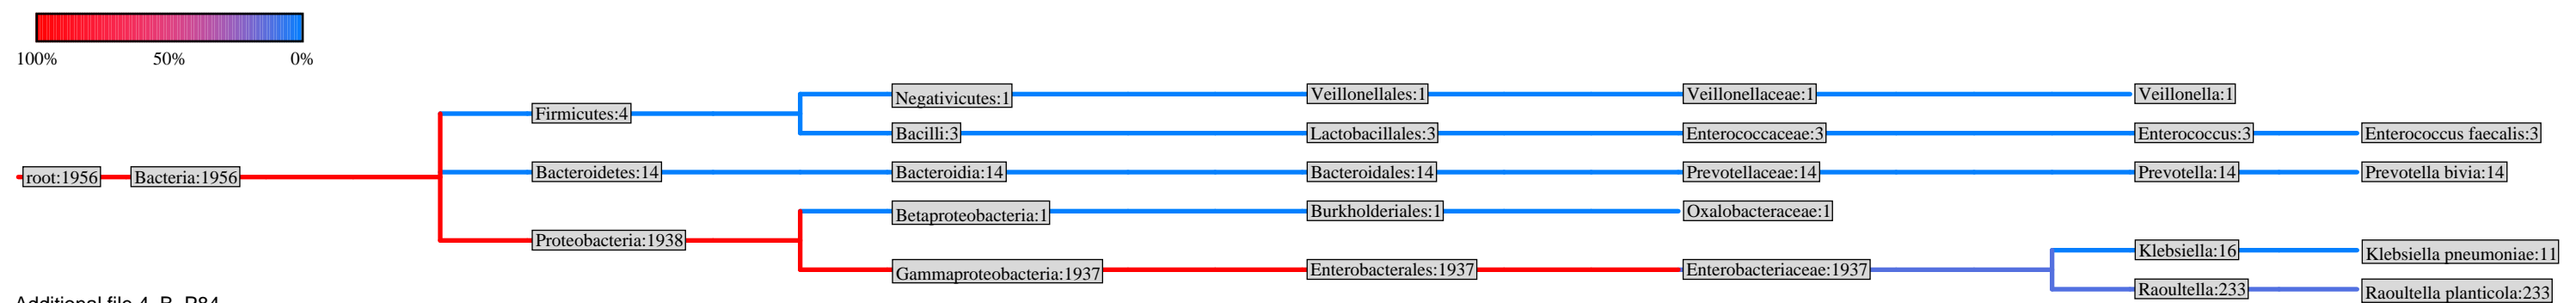

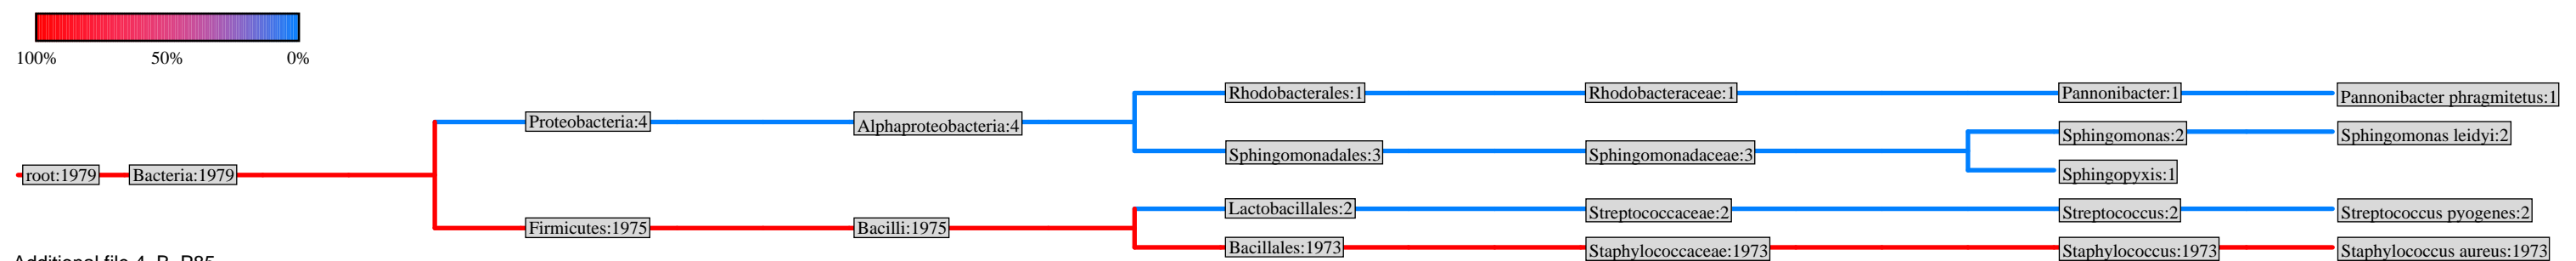

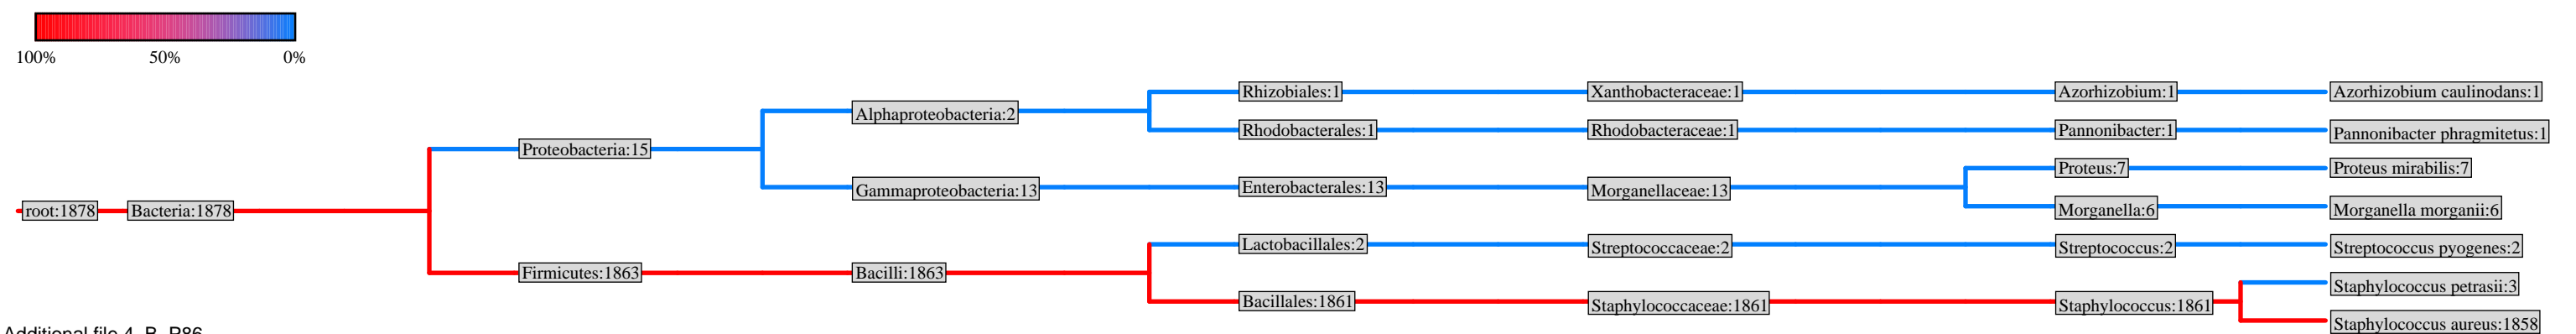



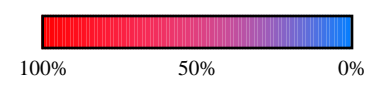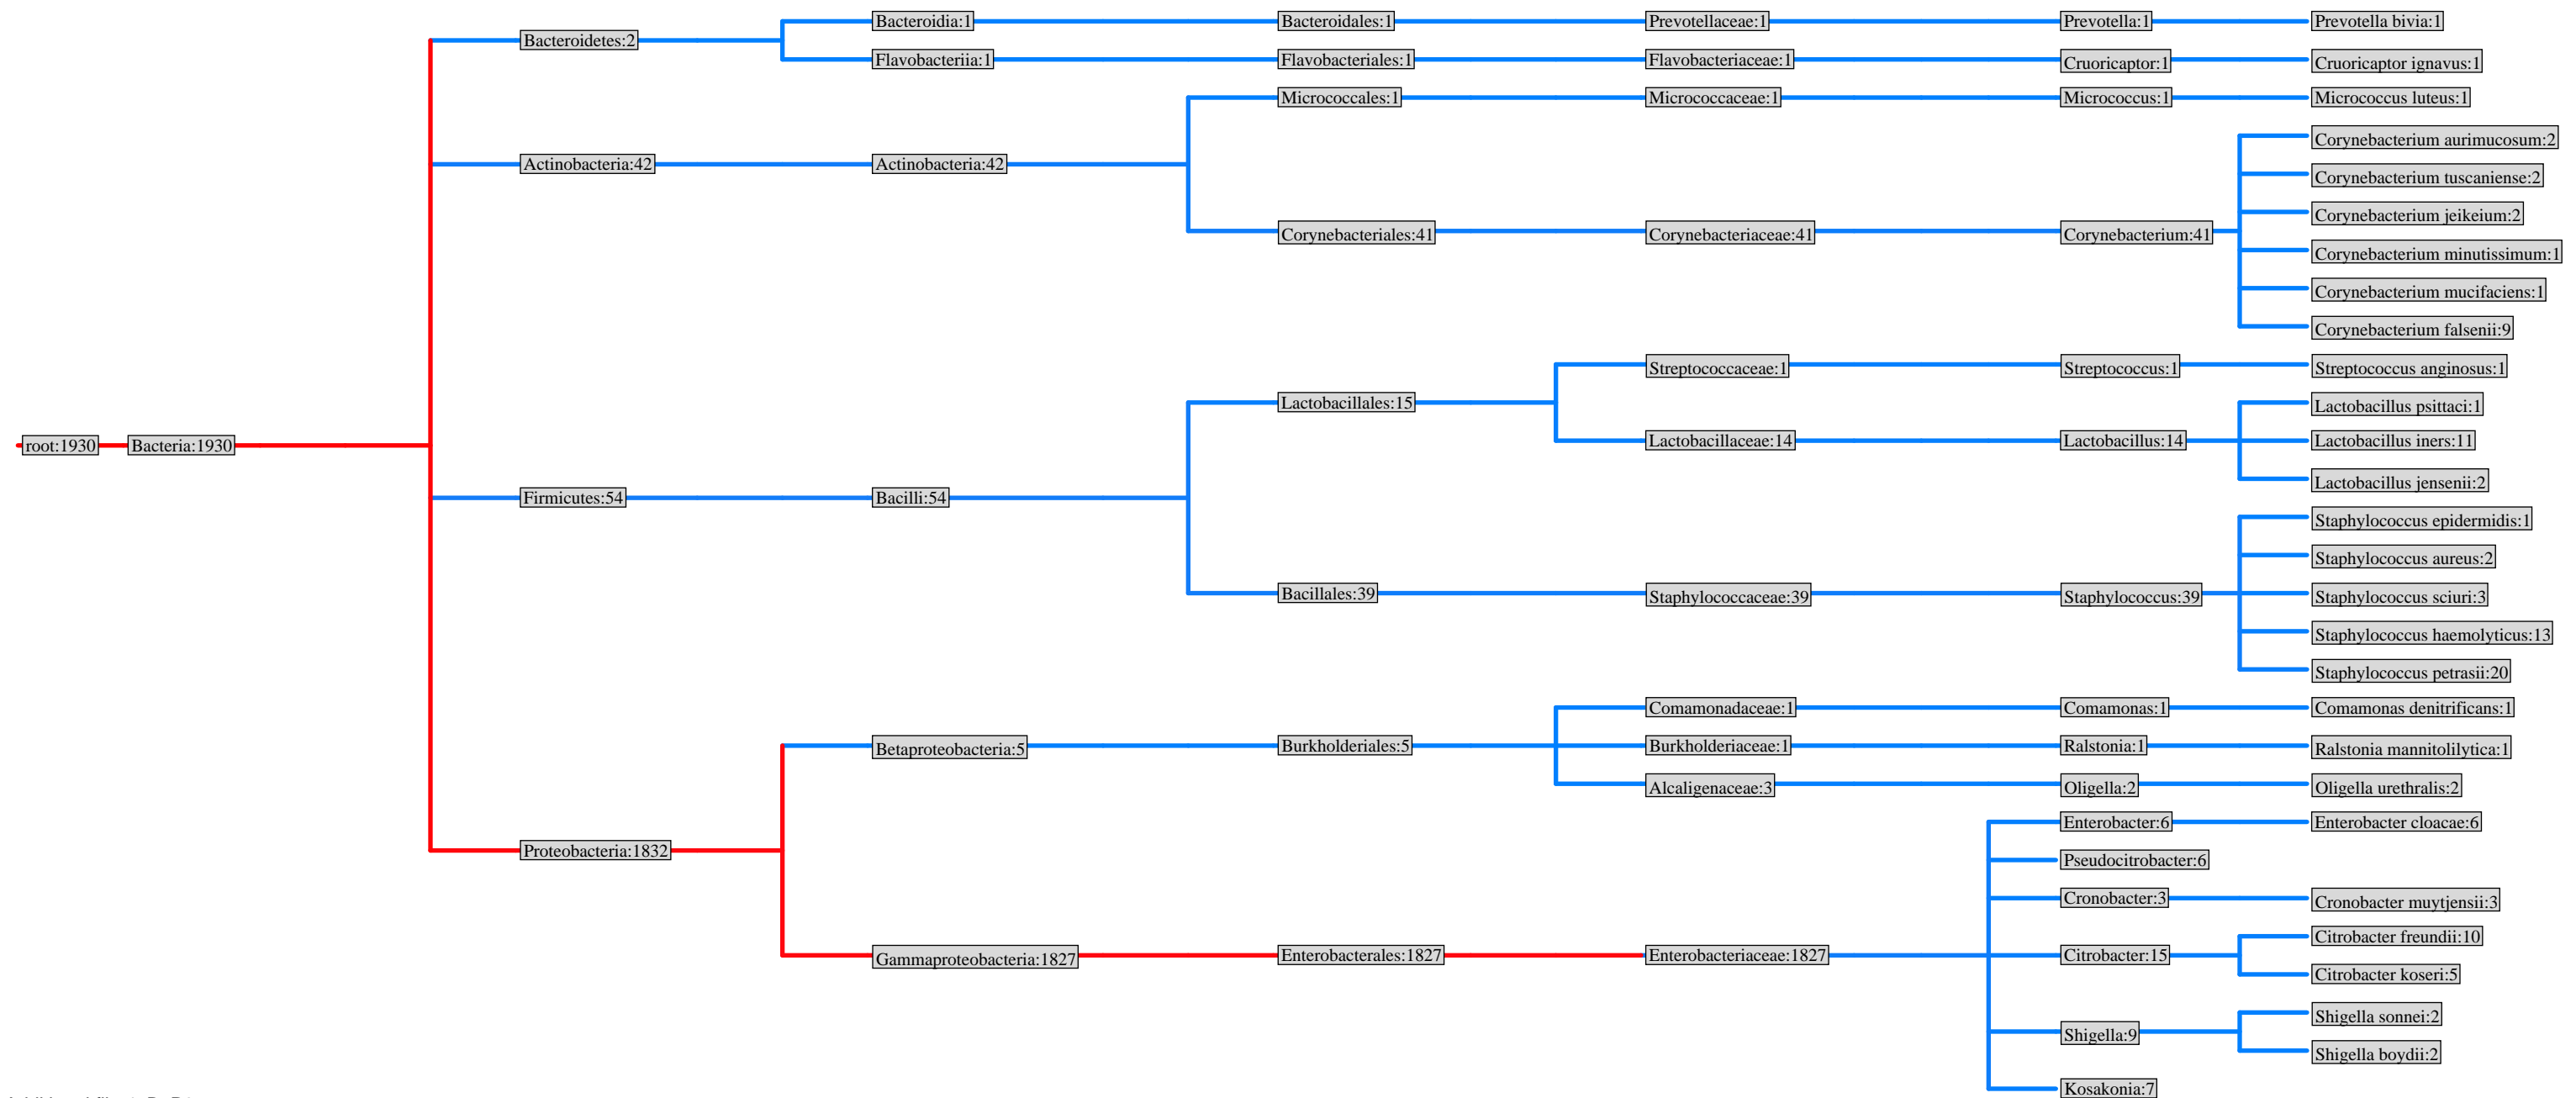

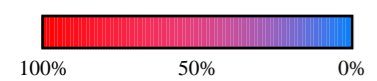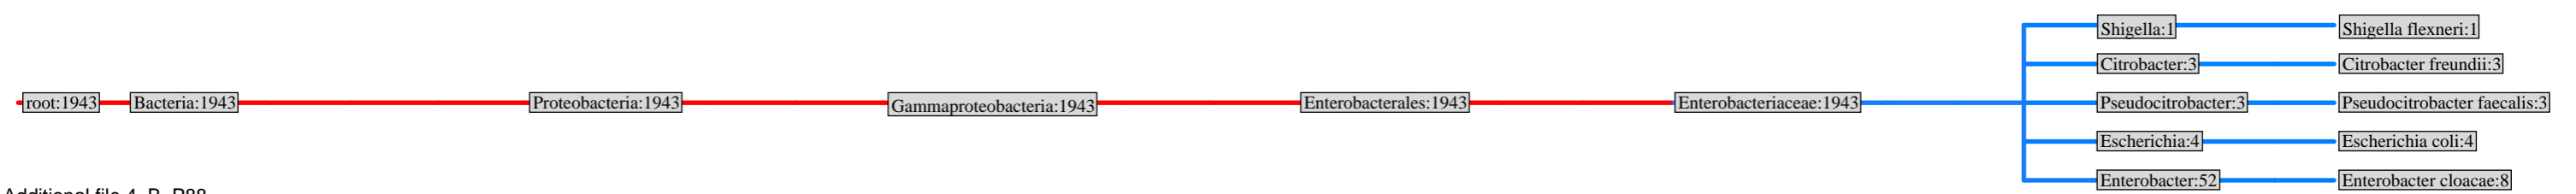

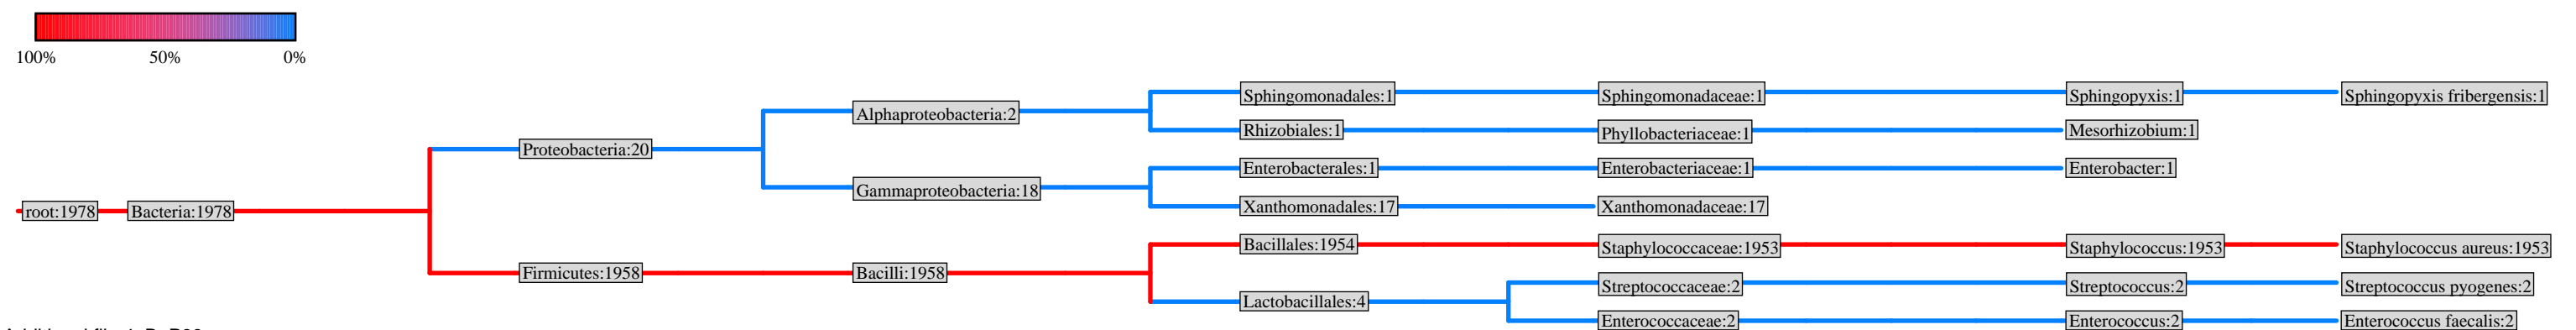

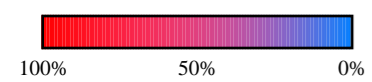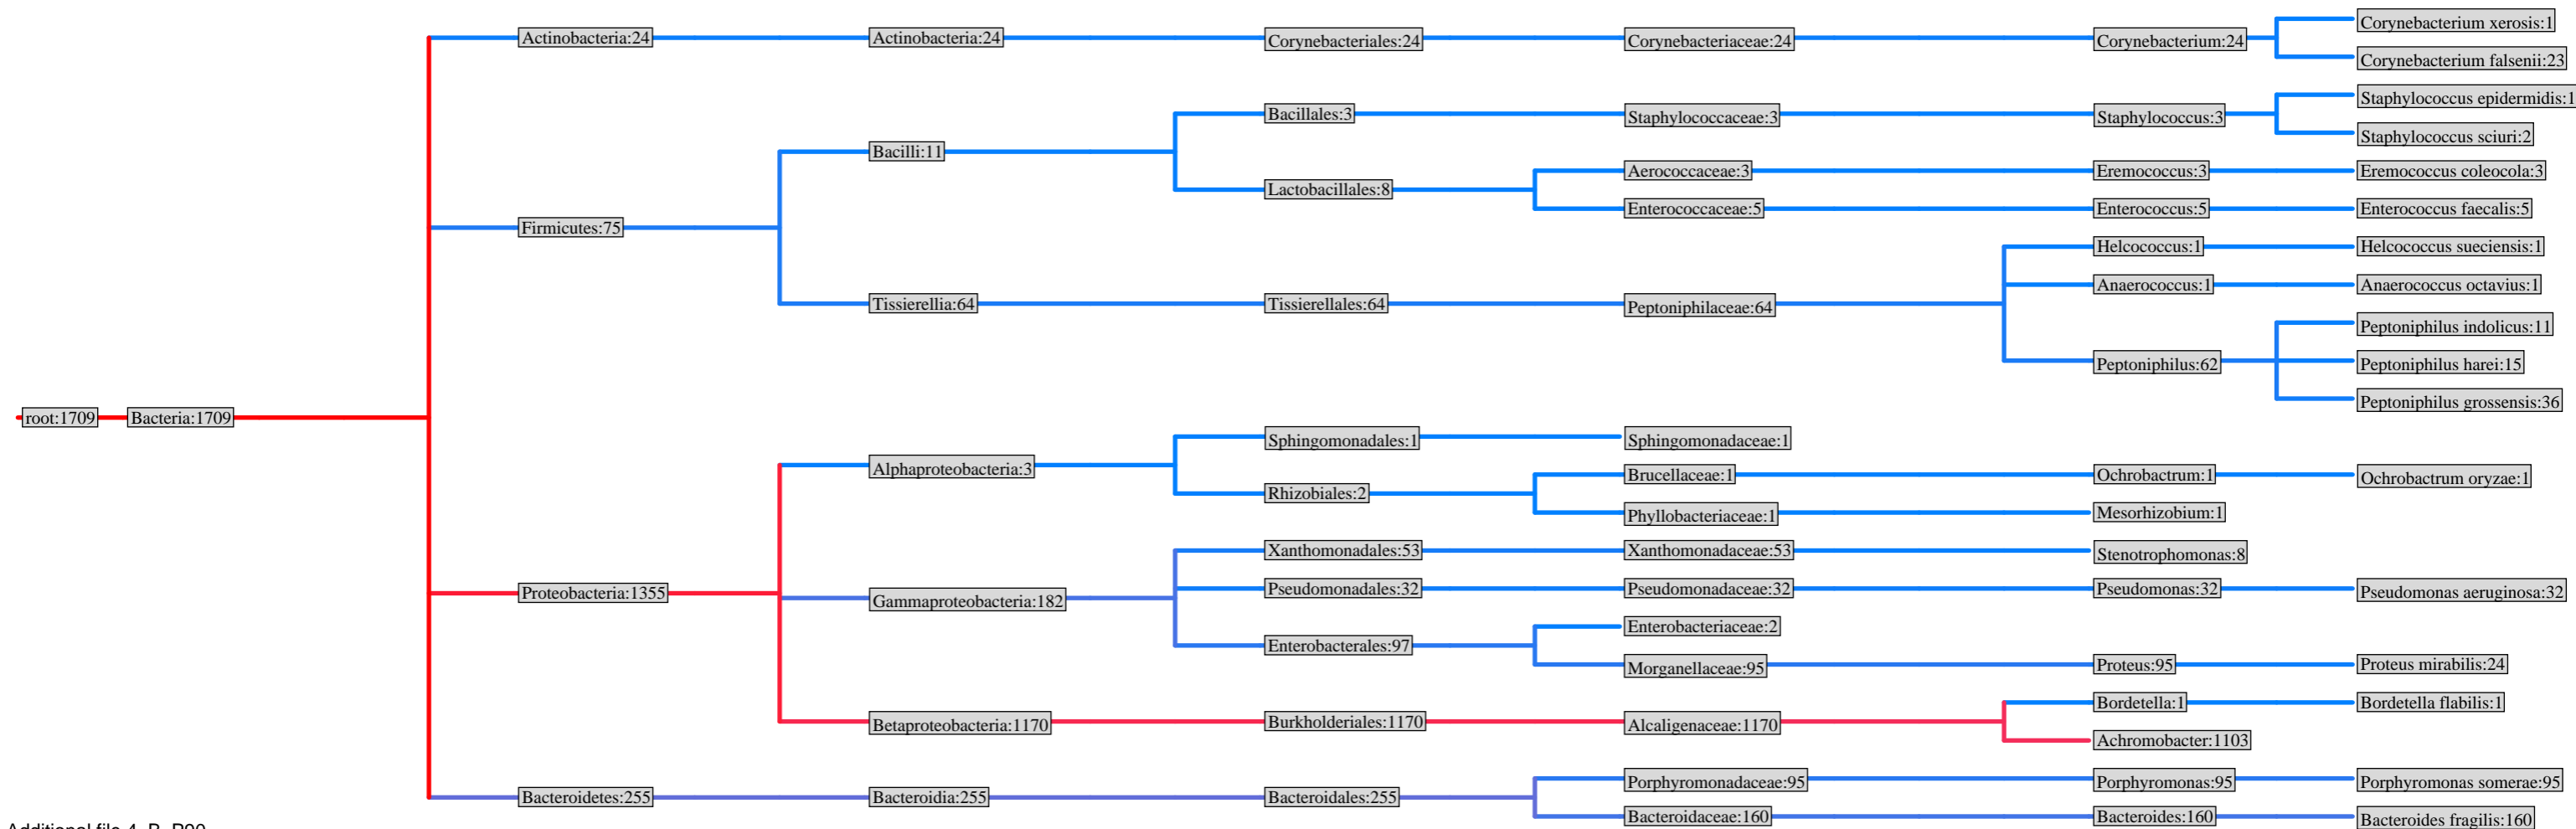

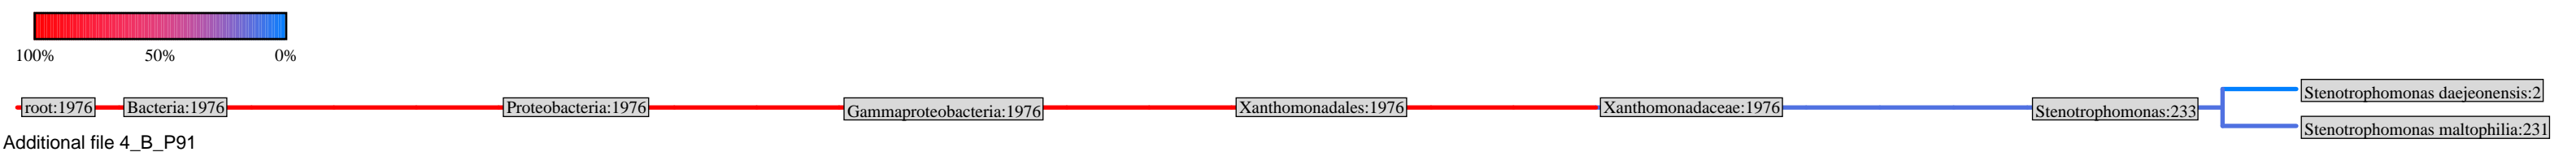

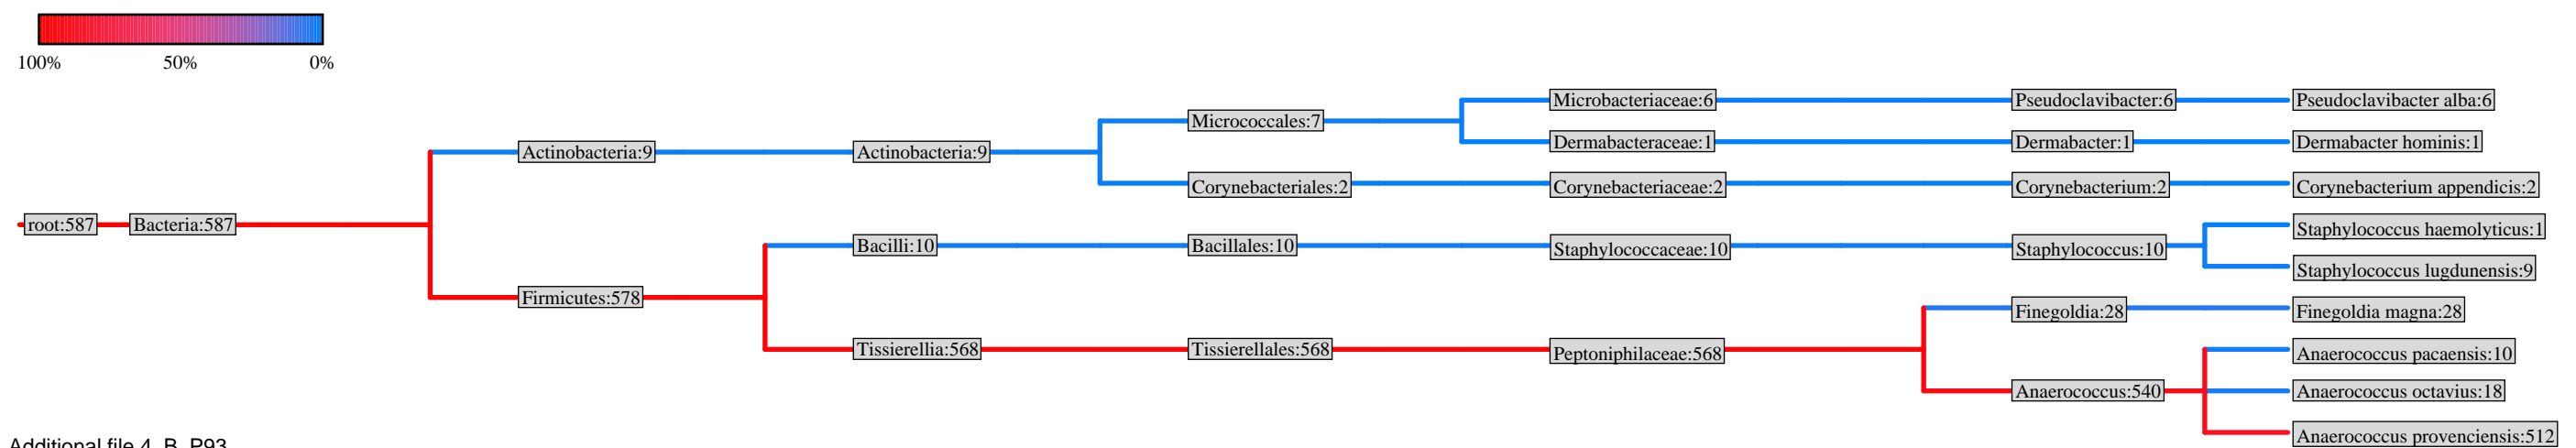

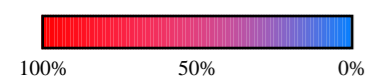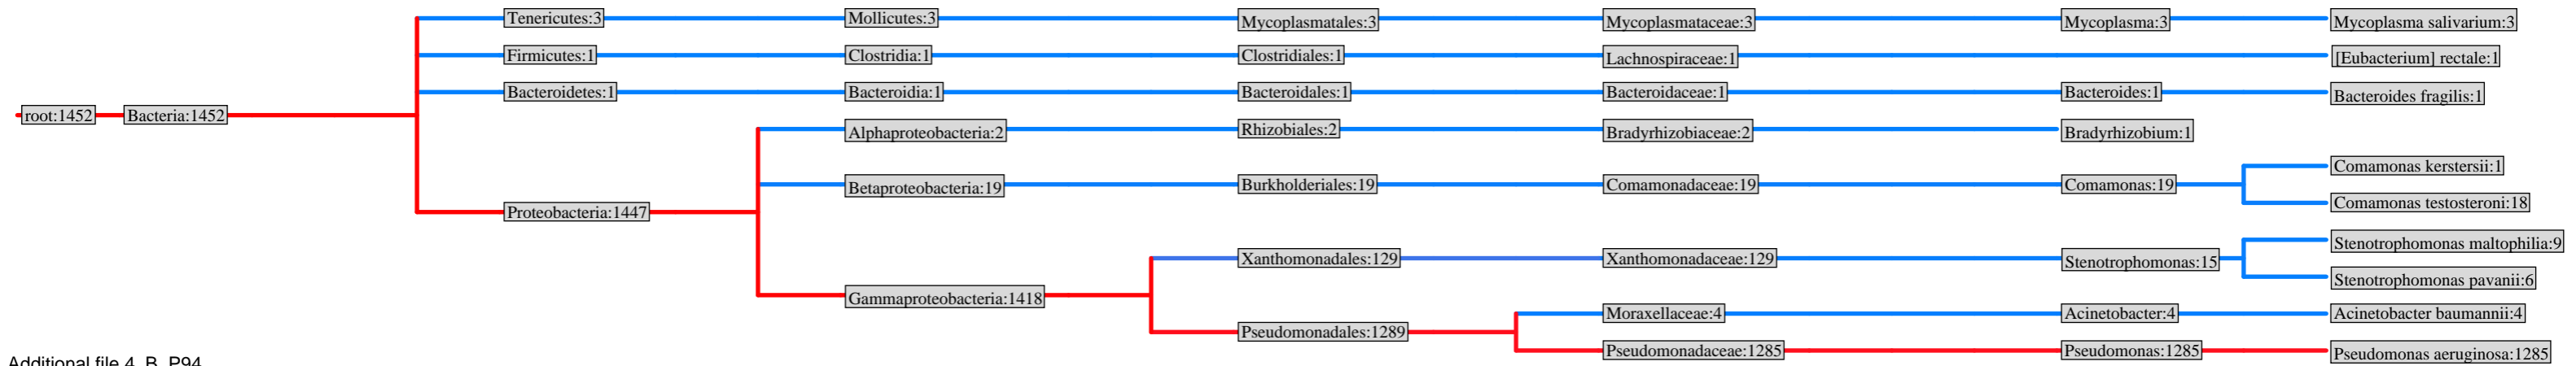

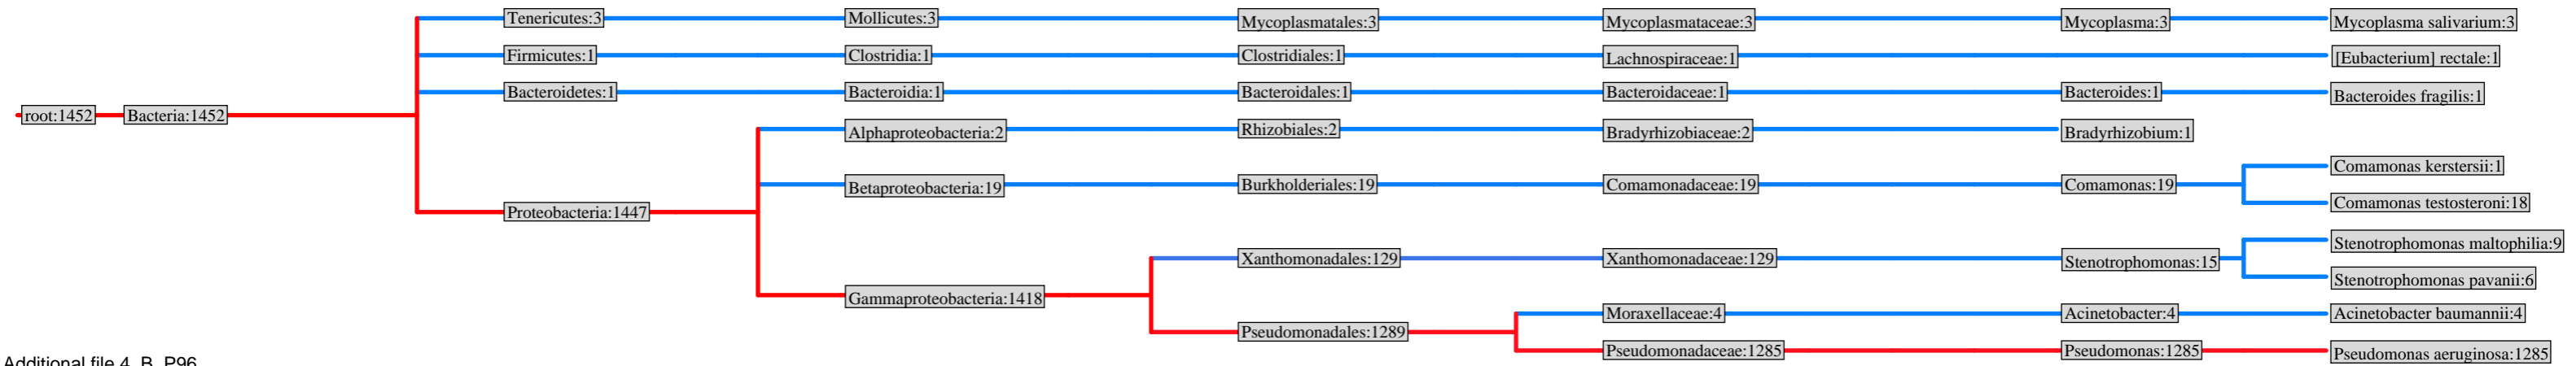



Additional file 4\_F\_P17

100%  
50%  
0%

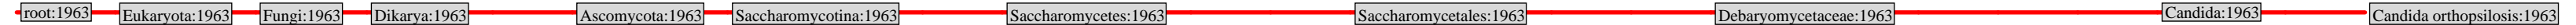

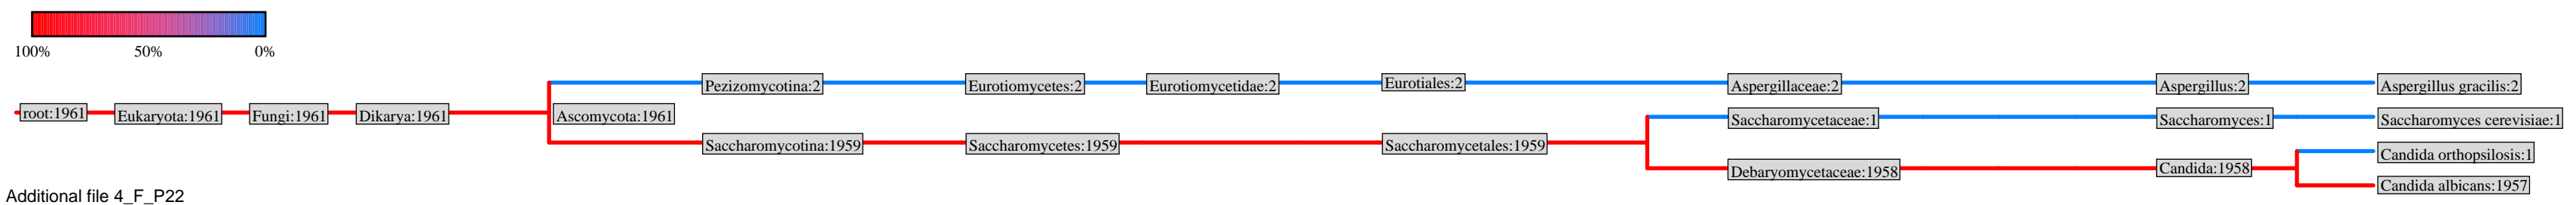

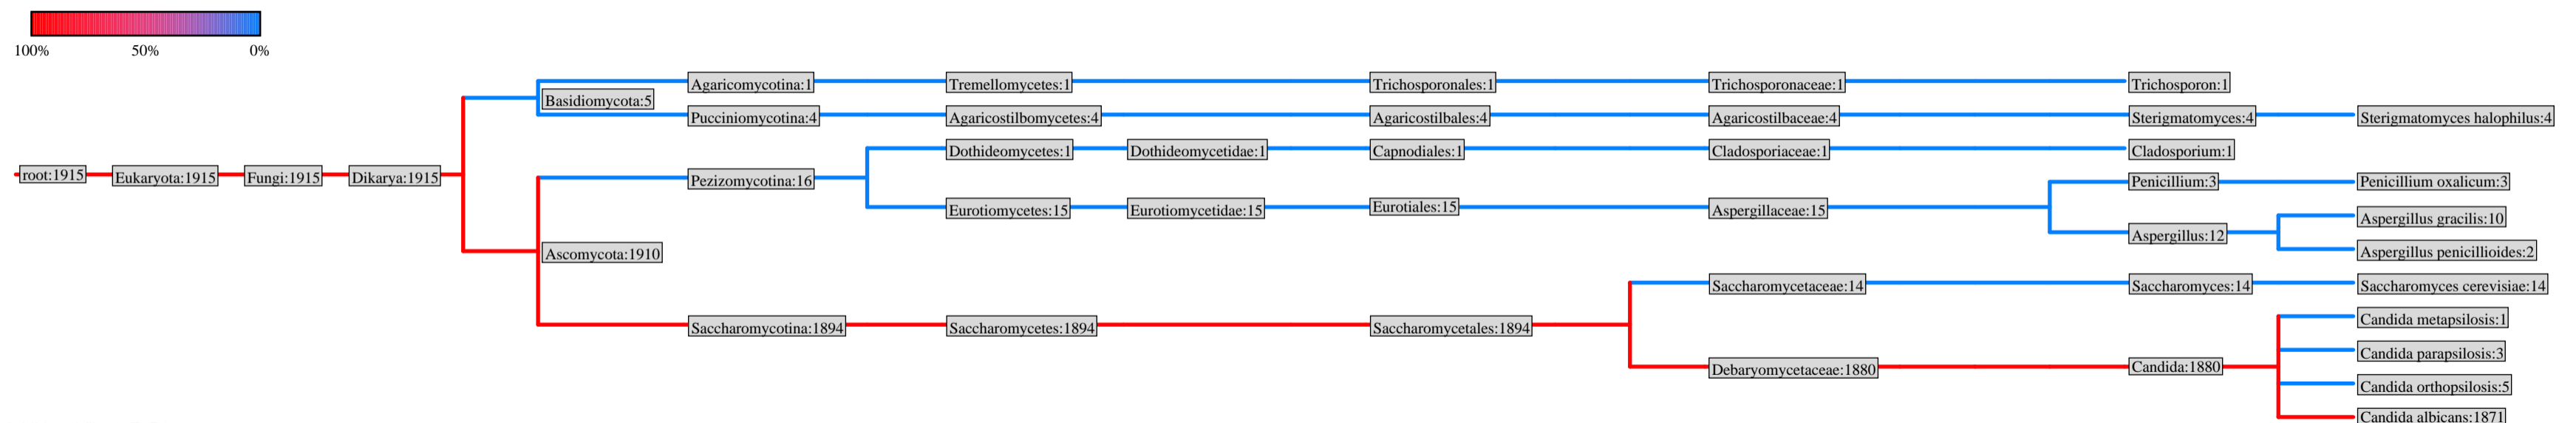

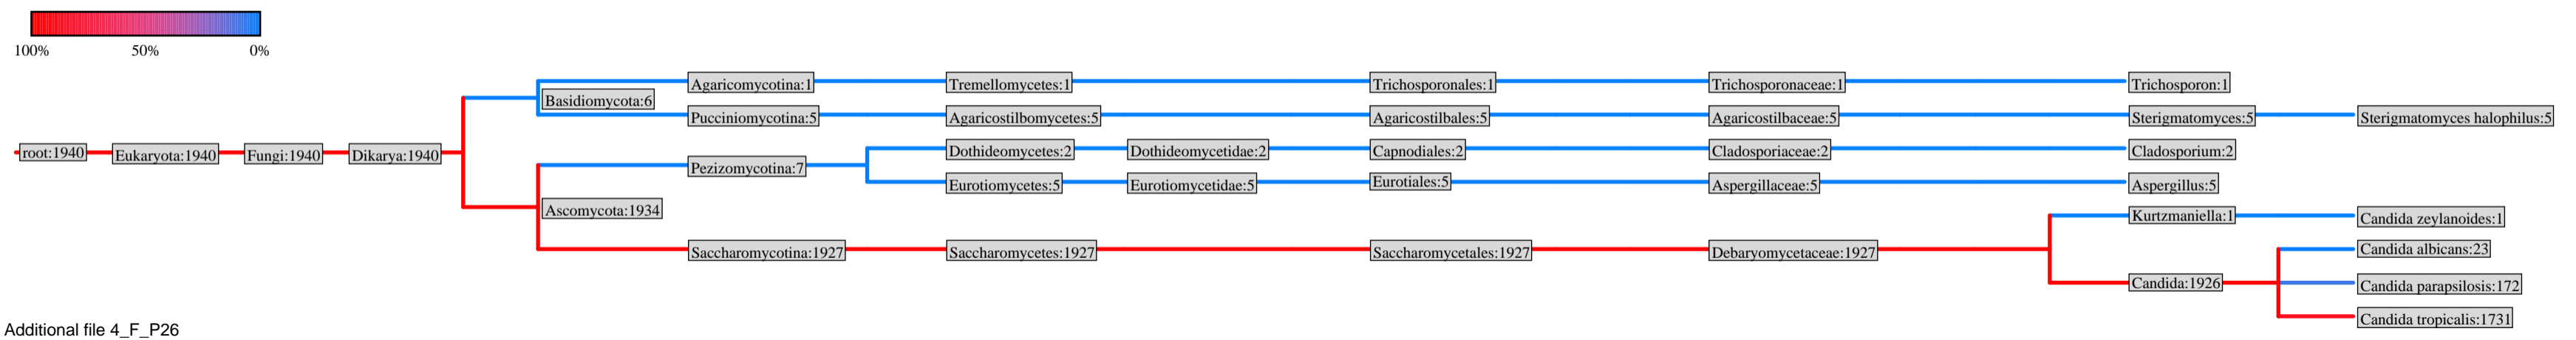

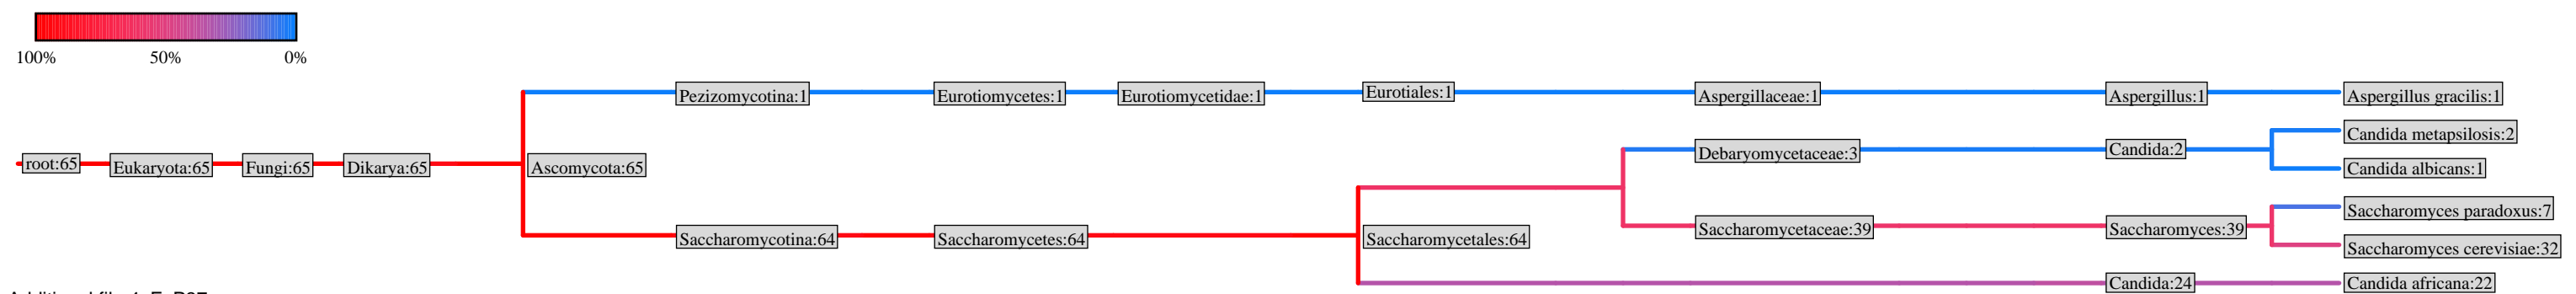

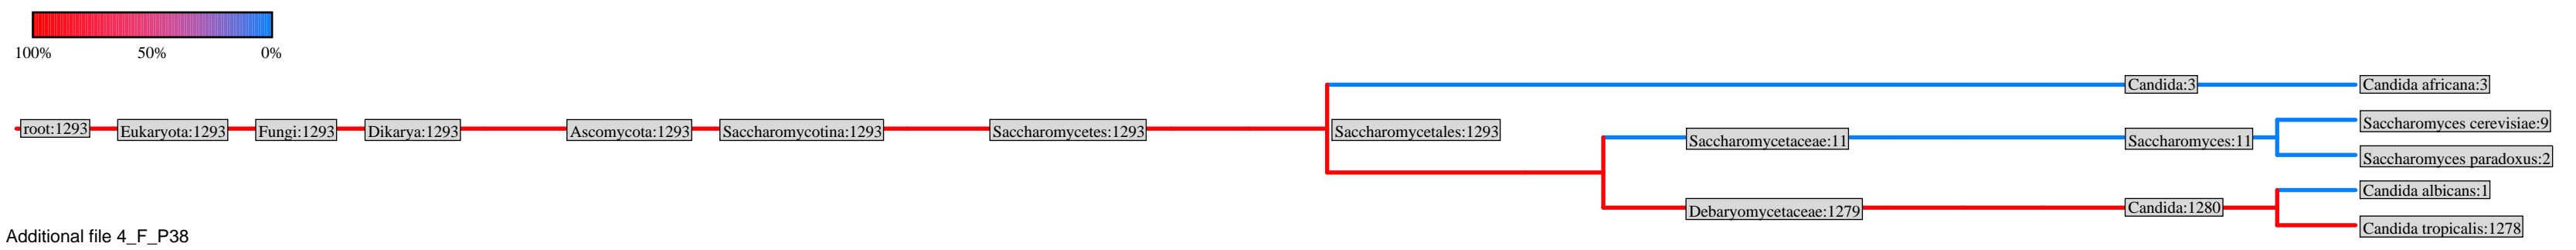

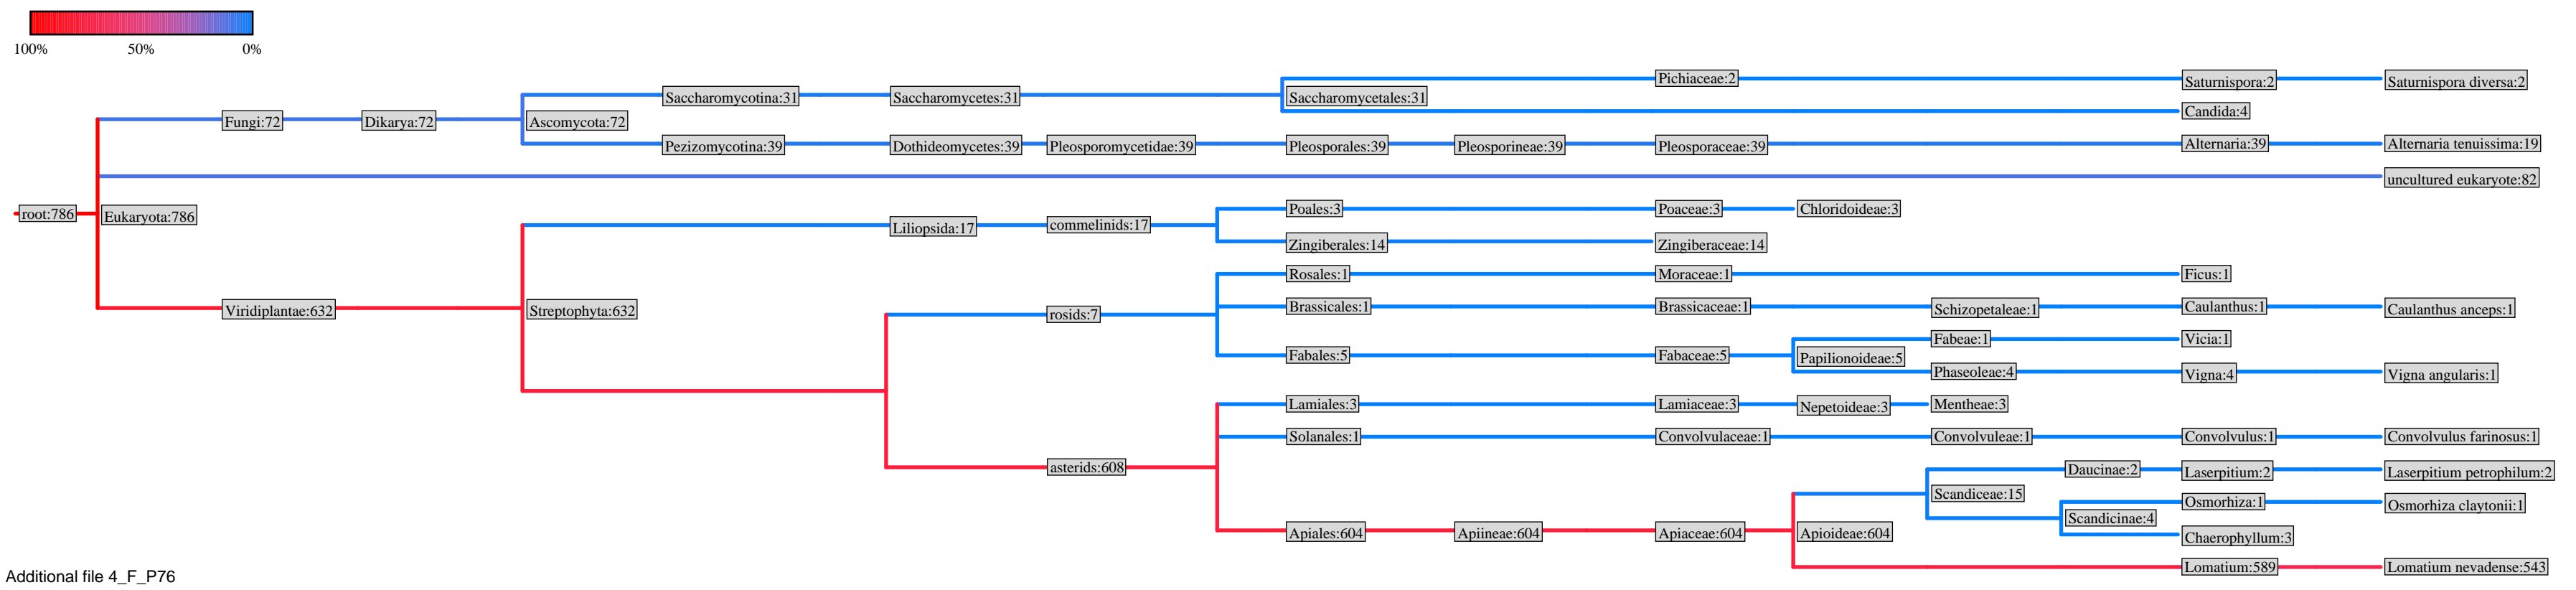

Additional file 4\_F\_P81

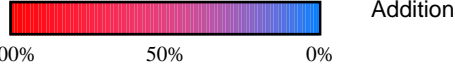

100%      50%      0%

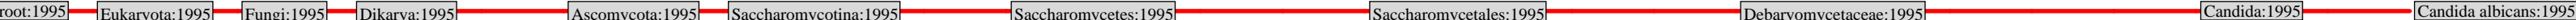



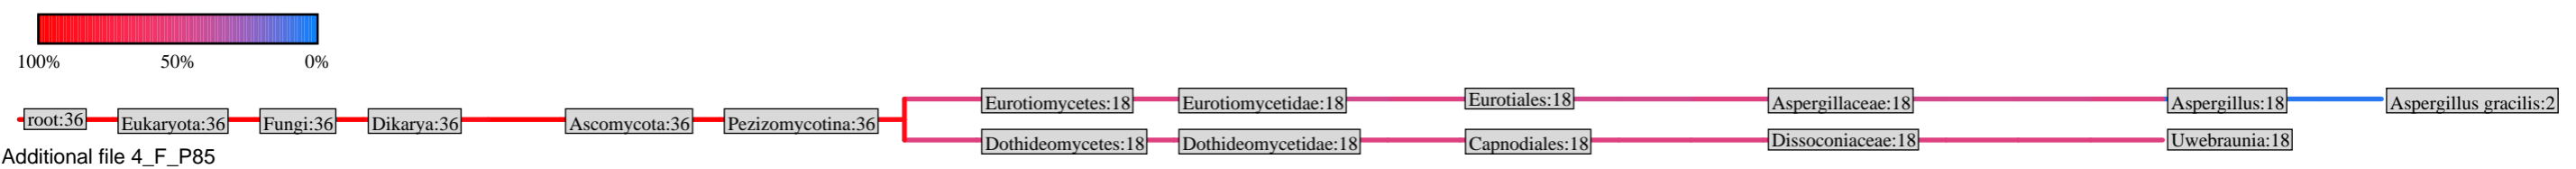

Supplement: 12879_2017_2727_MOESM4_ESM.pdf [file 12879_2017_2727_MOESM4_ESM.pdf]
